# Supplementary material for: The antimicrobial potential of cannabidiol
Source: PubMed Central journal article supplement (PMC7815910; doi:10.1038/s42003-020-01530-y), 2021-01-19
Supplement: 42003_2020_1530_MOESM2_ESM.pdf [file 42003_2020_1530_MOESM2_ESM.pdf]

## Supplementary Material

### The antimicrobial potential of cannabidiol

---

Mark A.T. Blaskovich<sup>1\*</sup>, Angela M. Kavanagh<sup>1</sup>, Alysha G. Elliott<sup>1</sup>, Bing Zhang<sup>1</sup>, Soumya Ramu<sup>1</sup>, Maite Amado<sup>1</sup>, Gabrielle J. Lowe<sup>1</sup>, Alexandra O. Hinton<sup>1</sup>, Do Minh Thu Pham<sup>1</sup>, Johannes Zuegg<sup>1</sup>, Neil Beare<sup>2</sup>, Diana Quach<sup>3</sup>, Marc D. Sharp<sup>3</sup>, Joe Pogliano<sup>3,4</sup>, Ashleigh P. Rogers<sup>5</sup>, Dena Lyras<sup>5</sup>, Lendl Tan<sup>6</sup>, Nicholas P. West,<sup>6</sup> David W. Crawford<sup>7</sup>, Marnie Peterson<sup>7</sup>, Matthew Callahan<sup>8</sup>, and Michael Thurn<sup>8</sup>

---

<sup>1</sup> Centre for Superbug Solutions, Institute for Molecular Bioscience, The University of Queensland, St. Lucia, Queensland 4072, Australia

<sup>2</sup> BDG Synthesis, Wellington 5045, New Zealand

<sup>3</sup> Linnaeus Bioscience Inc., 3210 Merryfield Row, San Diego, CA 92121, USA

<sup>4</sup> Division of Biological Sciences, University of California, San Diego, CA 92093, USA

<sup>5</sup> Infection and Immunity Program, Monash Biomedicine Discovery Institute and Department of Microbiology, Monash University, Clayton, Victoria 3800, Australia

<sup>6</sup> School of Chemistry and Molecular Biosciences, The University of Queensland, St Lucia, Queensland 4072, Australia

<sup>7</sup> Extherid Biosciences, 3545 S Park Dr, Jackson, WY83001 USA

<sup>8</sup> Botanix Pharmaceuticals Ltd, Level 1, 50 Angove Street North Perth, Western Australia 6005, Australia

## Supplementary figures

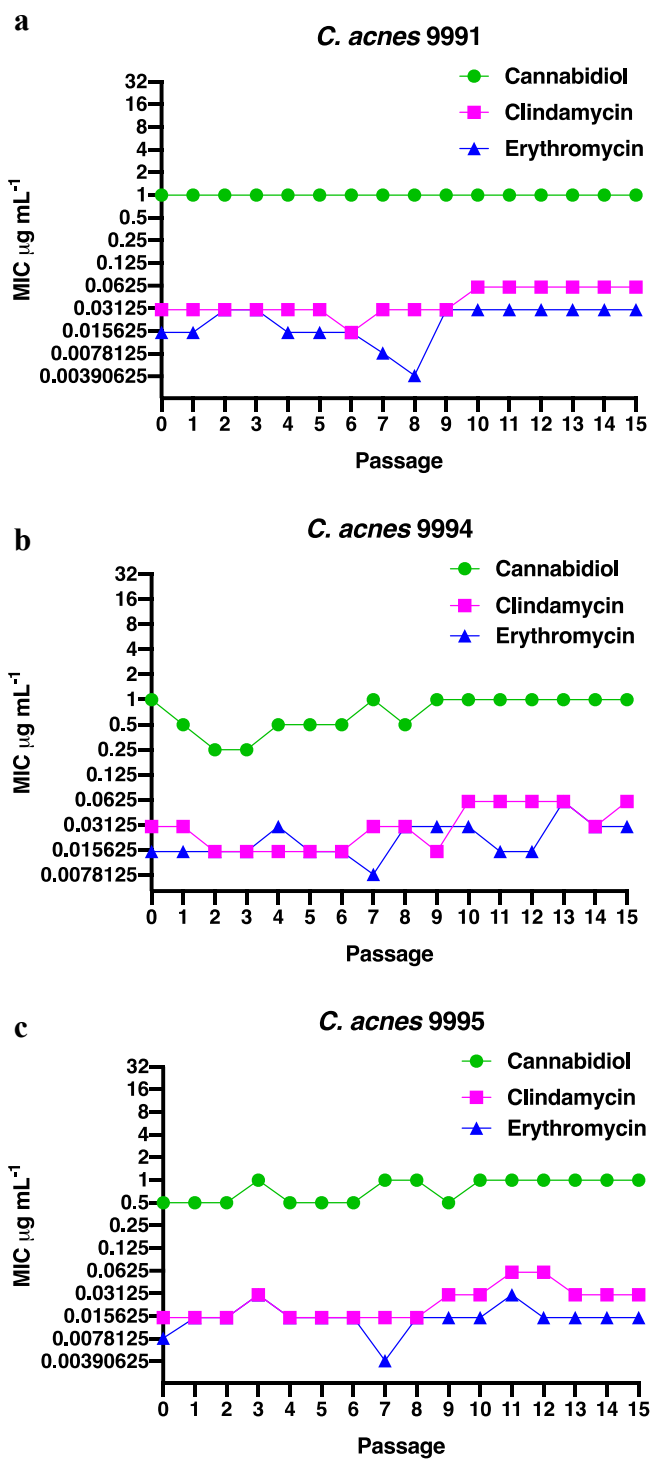

**Supplementary Fig. 1: Broth microdilution serial passage resistance induction studies.**

**a, b, c** Induction studies performed for three *C. acnes* strains over 15 passages, with each passage requiring anaerobic incubation for 46–48 h at 35–37 °C; n = 1.

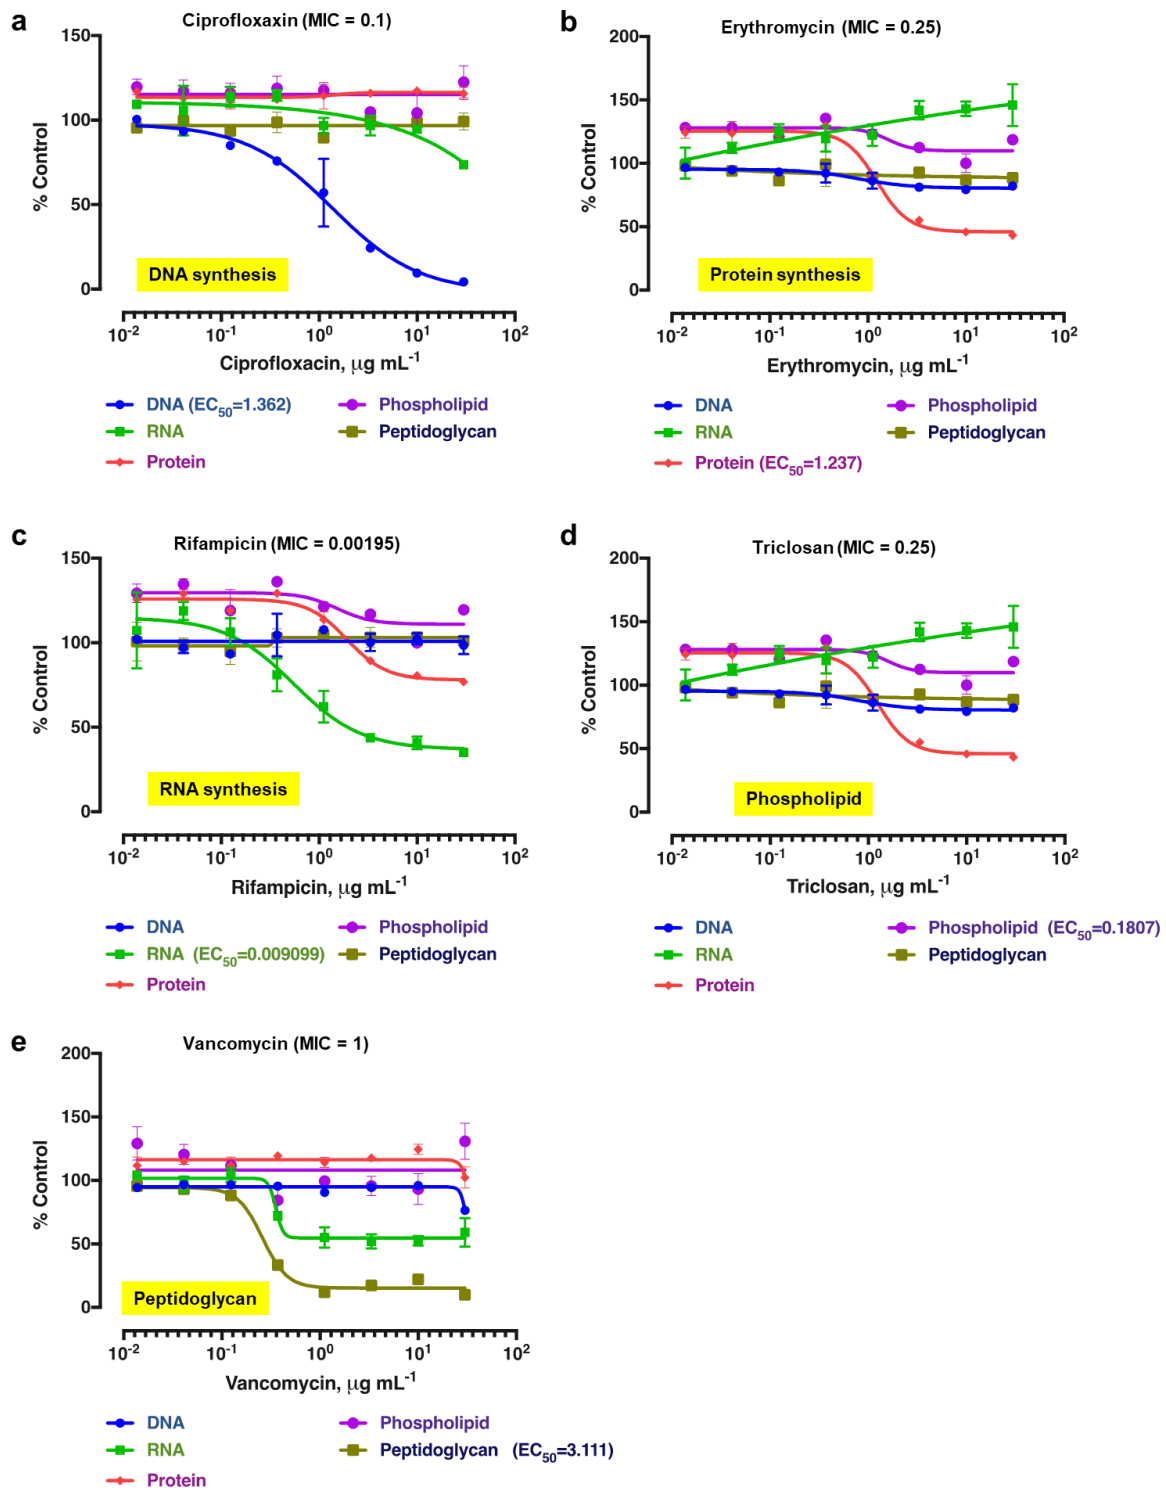

### Supplementary Fig. 2: Macromolecular synthesis.

Control antibiotics tested in macromolecular synthesis assay in *S. aureus* RN42200 showing inhibition of radiolabelled substrate uptake in (a) DNA ([2-<sup>14</sup>C]-thymidine), (b) protein (L-[4,5-<sup>3</sup>H]-leucine), (c) RNA ([5,6-<sup>3</sup>H]-uracil), (d) phospholipid ([2-<sup>3</sup>H]-glycerol) and (e) peptidoglycan ([<sup>14</sup>C(U)]-glycine) synthesis pathways after 35 min incubation. MIC values are displayed as  $\mu\text{g mL}^{-1}$ . Data are mean  $\pm$  SD for n=2 biologically independent samples.

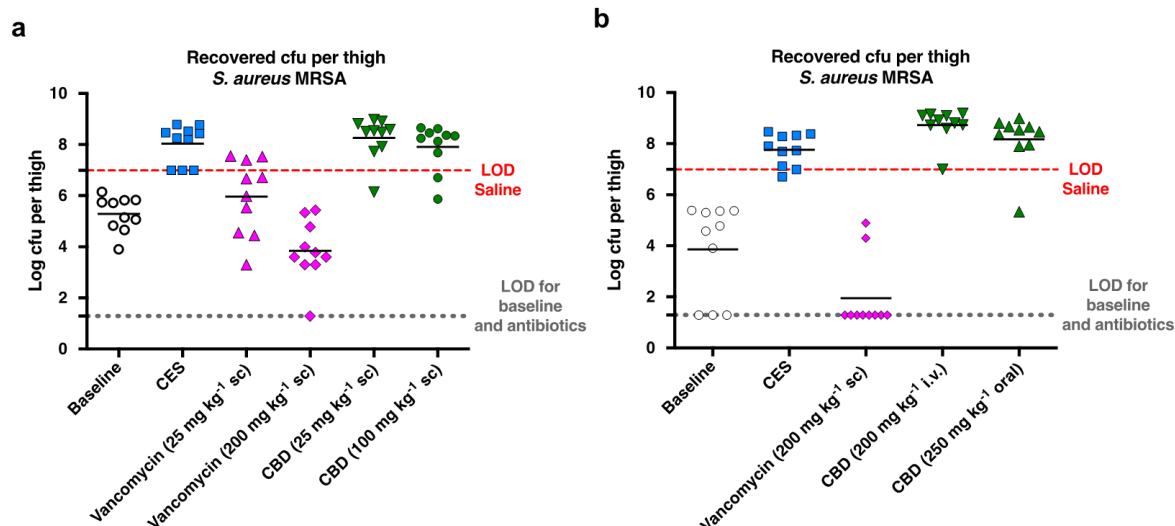

### Supplementary Fig. 3: MRSA murine thigh infection model.

Immunocompromised mice (n=5 group) were inoculated in both thighs with  $1 \times 10^6$  CFU of *S. aureus* ATCC 43300 (MRSA) bacteria. One group was sacrificed 2 h after infection for a baseline measurement, at the same time as treatment was initiated with (a) subcutaneous doses of saline, vancomycin (25 and 200 mg kg<sup>-1</sup>) and CBD (25 and 100 mg kg<sup>-1</sup>), or (b) subcutaneous saline and vancomycin (200 mg kg<sup>-1</sup>), oral CBD (250 mg kg<sup>-1</sup>) and intraperitoneal (ip) CBD (200 mg kg<sup>-1</sup>). Animals were sacrificed 24 h after dosing, thighs were excised and homogenised, then diluted and plated to determine CFU/thigh levels. Data are n = 5 animals, with n = 2 biological samples per mouse (both thighs). Errors are mean  $\pm$  SEM. CES, saline negative control; LOD, level of detection.

**Supplementary Table 1.** Minimum inhibitory concentrations (MICs) of CBD ( $\mu\text{g mL}^{-1}$ ) against Gram-positive bacteria.

| Species                                          | Strain                                        | Vanco-<br>mycin | Dapto-<br>mycin | Trimeth-<br>oprim | Mupir-<br>ocin | Clinda-<br>mycin | CBD   |
|--------------------------------------------------|-----------------------------------------------|-----------------|-----------------|-------------------|----------------|------------------|-------|
| <i>Staphylococcus aureus</i> <sup>1</sup>        | ATCC 25923 MSSA                               | 1–2             | 1–2             | 2–4               | 0.25–0.5       | 0.06–0.25        | 1–2   |
| <i>Staphylococcus aureus</i> <sup>1</sup>        | ATCC 29213 MSSA                               | 0.5–1           | 0.5–2           | 2–4               | 0.25–0.5       | 0.06–0.25        | 1–2   |
| <i>Staphylococcus aureus</i> <sup>1</sup>        | ATCC 43300 MRSA                               | 0.5–1           | 0.5–1           | 2                 | 0.125–0.5      | >64              | 1–2   |
| <i>Staphylococcus aureus</i> <sup>1</sup>        | ATCC 33591 MRSA                               | 0.5–2           | 1–2             | 1–2               | 0.125–0.5      | >64              | 1–2   |
| <i>Staphylococcus aureus</i> <sup>1</sup>        | Clinical isolate MRSA<br>Daptomycin resistant | 1–2             | 2–4             | >64               | 0.125–0.25     | >64              | 2–8   |
| <i>Staphylococcus aureus</i> <sup>1</sup>        | ATCC 700699, NRS-<br>1 MRSA VISA              | 2–4             | 4–8             | 2–4               | 0.125–0.5      | 64               | 1–4   |
| <i>Staphylococcus aureus</i> <sup>1</sup>        | VRS1 VRSA                                     | >64             | 1–4             | >64               | 32–64          | >64              | 1–2   |
| <i>Staphylococcus capitis</i> <sup>1</sup>       | ATCC 27840                                    | 0.5–1           | 1               | 2–4               | 0.125–0.25     | 0.06–0.125       | 1–2   |
| <i>Staphylococcus epidermidis</i> <sup>1</sup>   | ATCC 12228                                    | 1–2             | 1–8             | 1–4               | 0.25–0.5       | 0.06–0.25        | 1–2   |
| <i>Staphylococcus epidermidis</i> <sup>1</sup>   | ATCC 14990                                    | 1–2             | 1               | 0.25–0.5          | 0.125–0.25     | 0.03–0.125       | 1–2   |
| <i>Staphylococcus epidermidis</i> <sup>1</sup>   | NRS 60 VISE                                   | 2–4             | 1–4             | >64               | 0.125–0.5      | 0.06–0.125       | 4–8   |
| <i>Staphylococcus saprophyticus</i> <sup>1</sup> | ATCC 15305                                    | 1–2             | 1               | 2–1               | ≤0.03          | 0.125–0.25       | 1–2   |
| <i>Staphylococcus warneri</i> <sup>1</sup>       | ATCC 27836                                    | 0.5–2           | 1               | 1–2               | 0.5            | 0.06–0.125       | 2–4   |
| <i>Staphylococcus warneri</i> <sup>1</sup>       | Clinical isolate                              | 0.5–1           | 1               | 0.25–0.5          | 0.25–0.5       | 0.06–0.125       | 2–4   |
| <i>Streptococcus canis</i> <sup>1</sup>          | ATCC 43496                                    | ≤0.03–0.125     | ≤0.03–0.125     | 0.25–1            | ≤0.03          | 0.25             | 0.5–1 |
| <i>Streptococcus pneumoniae</i> <sup>11</sup>    | ATCC 33400                                    | 0.5–1           | 1–4             | 0.5–2             | 0.25–0.5       | 0.06–2           | 1–2   |
| <i>Streptococcus pneumoniae</i> <sup>1</sup>     | ATCC 700677 MDR                               | 1               | 1–4             | 1–2               | 0.25–0.5       | >64              | 1–4   |
| <i>Streptococcus intermedius</i> <sup>1</sup>    | ATCC 43496                                    | 0.5–1           | 0.5             | 4–8               | 0.06–0.125     | 0.125            | 1–2   |
| <i>Streptococcus pyogenes</i> <sup>1</sup>       | ATCC 12344                                    | 0.25–0.5        | 0.125–0.25      | 2–4               | ≤0.03          | 0.125–0.25       | 1     |
| <i>Streptococcus pyogenes</i> <sup>1</sup>       | ATCC 49399                                    | 0.125–0.25      | 0.06            | ≤0.03             | ≤0.03          | 0.125            | 0.5   |
| <i>Streptococcus pyogenes</i> <sup>1</sup>       | ATCC 19615                                    | 0.25            | 0.06            | 0.5               | ≤0.03          | 0.06–0.125       | 1     |
| <i>Streptococcus pyogenes</i> <sup>1</sup>       | ATCC BAA-1412                                 | 0.25            | 0.06            | ≤0.03–0.06        | 32–>64         | ≤0.03–0.06       | 1     |
| <i>Streptococcus pyogenes</i> <sup>1</sup>       | ATCC BAA-1414                                 | 0.125–0.25      | ≤0.03–0.06      | ≤0.06–0.125       | ≤0.03          | ≤0.03–0.06       | 1     |
| <i>Bacillus cereus</i> <sup>1</sup>              | ATCC 11778                                    | 0.125–1         | 1–4             | 0.25–1            | 0.25–0.5       | 0.5–2            | 1–2   |
| <i>Bacillus megaterium</i> <sup>1</sup>          | ATCC 13632                                    | 0.06–0.125      | 1–2             | 2                 | 32–>64         | 8–32             | 1–2   |
| <i>Bacillus subtilis</i> <sup>1</sup>            | ATCC 6633                                     | 0.06–0.5        | 0.5–2           | 0.125–0.25        | 0.25–0.5       | 0.5–2            | 1–2   |
| <i>Corynebacterium minutissimum</i> <sup>1</sup> | ATCC23347                                     | 0.125–0.25      | 0.06–0.125      | >64               | 1              | >64              | 1     |
| <i>Corynebacterium minutissimum</i> <sup>1</sup> | ATCC23348                                     | 0.125–0.25      | 0.06–0.125      | >64               | 1              | >64              | 1–2   |
| <i>Enterococcus faecium</i> <sup>1</sup>         | ATCC 35667                                    | 0.25–0.5        | 4–8             | ≤0.03–<br>0.06    | 1              | ≤0.03–<br>0.06   | 0.5–1 |
| <i>Enterococcus faecium</i>                      | ATCC700221 VRE                                | >64             | 8–16            | 8–16              | 1–2            | >64              | 1–2   |
| <i>Enterococcus faecalis</i> <sup>1</sup>        | ATCC 29212                                    | 1–2             | 4–8             | 0.25–0.5          | 64             | 16–32            | 2     |
| <i>Enterococcus faecalis</i>                     | clinical isolate VRE                          | 32              | 16              | 0.5–1             | >64            | >64              | 2–4   |
| <i>Enterococcus faecalis</i>                     | clinical isolate VRE                          | >64             | 8–16            | >64               | >64            | >64              | 2–4   |
| <i>Kocuria rosea</i> <sup>1</sup>                | ATCC 31251                                    | 1–2             | 1               | 1–2               | 0.06–0.125     | 4–16             | 1–2   |
|                                                  | Strain                                        | Vanco-<br>mycin |                 | Levo-<br>floxacin | Mero-<br>penem | Genta-<br>micin  | CBD   |
| <i>Staphylococcus aureus</i> <sup>2</sup>        | ATCC 29213                                    | 1               |                 | 0.25              | 0.06           | 0.25             | 2     |
| <i>Staphylococcus aureus</i> <sup>2</sup>        | ATCC 25923                                    | 1               |                 | 0.25              | 0.12           | 0.25             | 2     |
| <i>Staphylococcus aureus</i> <sup>2</sup>        | ATCC 43300 MRSA                               | 1               |                 | 0.25              | 8              | 32               | 1     |
| <i>Staphylococcus aureus</i> <sup>2</sup>        | MMX 4665 VISA,<br>DaptoNS                     | 4               |                 | >32               | 32             | 32               | 1     |
| <i>Staphylococcus epidermidis</i> <sup>2</sup>   | MMX 5388 MSSE                                 | 2               |                 | 0.25              | ≤0.03          | ≤0.03            | 1     |
| <i>Staphylococcus epidermidis</i> <sup>2</sup>   | MMX 5139 MRSE                                 | 0.5             |                 | >32               | 0.12           | ≤0.03            | 1     |
| <i>Staphylococcus haemolyticus</i> <sup>2</sup>  | MMX 7665                                      | 0.5             |                 | 0.25              | 0.12           | ≤0.03            | 1     |
| <i>Enterococcus faecalis</i> <sup>2</sup>        | ATCC 29212                                    | 2               |                 | 0.5               | 4              | 8                | 2     |
| <i>Enterococcus faecalis</i> <sup>2</sup>        | MMX 8958                                      | 0.5             |                 | 1                 | 4              | >32              | 2     |
| <i>Enterococcus faecalis</i> <sup>2</sup>        | MMX 486 vanA VRE                              | >32             |                 | >32               | 4              | >32              | 2     |
| <i>Enterococcus faecalis</i> <sup>2</sup>        | MMX 481 vanB VRE                              | >32             |                 | 16                | 4              | >32              | 1     |
| <i>Enterococcus faecium</i> <sup>2</sup>         | ATCC 19434                                    | 0.25            |                 | 4                 | 8              | 4                | 0.5   |
| <i>Enterococcus faecium</i> <sup>2</sup>         | MMX 485 vanA VRE                              | >32             |                 | 2                 | >32            | >32              | 1     |
| <i>Enterococcus gallinarum</i> <sup>2</sup>      | ATCC 700425                                   | 4               |                 | 1                 | 32             | 8                | 1     |
| <i>Streptococcus pneumoniae</i> <sup>2</sup>     | ATCC 49619 PISP                               | 0.12            |                 | 0.5               | ≤0.03          | 8                | 1     |
| <i>Streptococcus pneumoniae</i> <sup>2</sup>     | MMX 7808 PRSP                                 | 0.12            |                 | 1                 | 0.25           | 8                | 8     |
| <i>Streptococcus pneumoniae</i> <sup>2</sup>     | MMX 5440 MDR                                  | 0.25            |                 | 1                 | 0.5            | 4                | 16    |
| <i>Streptococcus pyogenes</i> <sup>2</sup>       | ATCC 19615                                    | 0.25            |                 | 0.5               | ≤0.03          | 4                | 16    |
| <i>Streptococcus pyogenes</i> <sup>2</sup>       | MMX 3820 ERY <sup>R</sup>                     | 0.25            |                 | 0.25              | ≤0.03          | 8                | 16    |

|                                                |                           |      |  |      |       |       |    |
|------------------------------------------------|---------------------------|------|--|------|-------|-------|----|
| <i>Streptococcus agalactiae</i> <sup>2</sup>   | MMX 4088                  | 0.5  |  | 1    | ≤0.03 | 32    | 16 |
| <i>Streptococcus agalactiae</i> <sup>2</sup>   | MMX 4115 MLS              | 0.5  |  | 1    | ≤0.03 | 16    | 16 |
| Group C <i>Streptococcus</i> <sup>2</sup>      | MMX 5125 ERY <sup>R</sup> | 0.5  |  | 0.5  | ≤0.03 | 8     | 1  |
| Group G <i>Streptococcus</i> <sup>2</sup>      | MMX 5121                  | 0.25 |  | 0.5  | ≤0.03 | 8     | 16 |
| <i>Streptococcus constellatus</i> <sup>2</sup> | MMX 5677                  | 0.25 |  | 1    | ≤0.03 | 2     | 8  |
| <i>Streptococcus oralis</i> <sup>2</sup>       | MMX 5821 ERY <sup>R</sup> | 0.25 |  | 1    | ≤0.03 | 4     | 16 |
| <i>Streptococcus mutans</i> <sup>2</sup>       | ATCC 25175                | 0.5  |  | 1    | ≤0.03 | 1     | 16 |
| <i>Corynebacterium jeikeium</i> <sup>2</sup>   | ATCC 43734                | 0.5  |  | 0.25 | 1     | >32   | 16 |
| <i>Corynebacterium striatum</i> <sup>2</sup>   | ATCC 6940                 | 0.25 |  | 0.25 | 0.12  | ≤0.03 | 16 |
| <i>Listeria monocytogenes</i> <sup>2</sup>     | ATCC 19115                | 1    |  | 1    | 0.12  | 0.25  | 32 |

### Gram-Positive: Anaerobic Conditions

| Species                                                                                                                                                                                      | Strain          | Vanco-<br>mycin | Erythro-<br>mycin | Tetra-<br>cycline | Mupir-<br>ocin     | Clinda-<br>mycin | CBD |
|----------------------------------------------------------------------------------------------------------------------------------------------------------------------------------------------|-----------------|-----------------|-------------------|-------------------|--------------------|------------------|-----|
| <i>Staphylococcus aureus</i> <sup>1</sup>                                                                                                                                                    | ATCC 43300 MRSA | 0.5-1           | >32               | 0.06-0.25         | 0.03-0.06          | >32              | 1-2 |
| <i>Propionibacterium acnes</i> <sup>1</sup>                                                                                                                                                  | ATCC 6919       | 0.25            | 0.125-0.25        | 0.125-0.5         | >32                | 0.125            | 1-2 |
| <i>Acidipropionibacterium acidipropionici</i> <sup>1</sup>                                                                                                                                   | ATCC 25562      | 0.125-0.25      | 2-4               | 0.125-0.5         | >32                | 0.125            | 0.5 |
| <i>Cutibacterium granulosum</i> <sup>1</sup>                                                                                                                                                 | ATCC 25564      | 0.25            | 0.125             | 0.125-0.25        | >32                | 0.03-0.125       | 2-4 |
|                                                                                                                                                                                              | Strain          |                 |                   |                   | Metro-<br>nidazole | Clinda-<br>mycin | CBD |
| <i>Clostridium difficile</i> <sup>2</sup>                                                                                                                                                    | ATCC 700057     |                 |                   |                   | 0.12               | 1                | 32  |
| <i>Clostridium perfringens</i> <sup>2</sup>                                                                                                                                                  | MMX 9784        |                 |                   |                   | 2                  | 1                | 32  |
| <i>Gemella morbillorum</i> <sup>2</sup>                                                                                                                                                      | MMX 3433        |                 |                   |                   | >32                | 16               | 16  |
| <i>Actinomyces naeslundii</i> <sup>2</sup>                                                                                                                                                   | MMX 627         |                 |                   |                   | 32                 | 0.5              | 8   |
| <i>Eggerthella lenta</i> <sup>2</sup>                                                                                                                                                        | ATCC 43055      |                 |                   |                   | 0.25               | 0.12             | 32  |
| <i>Lactobacillus acidophilus</i> <sup>2</sup>                                                                                                                                                | ATCC 4356       |                 |                   |                   | >32                | 1                | 32  |
| <i>Bifidobacterium longum</i> <sup>2</sup>                                                                                                                                                   | MMX 9739        |                 |                   |                   | >32                | ≤0.03            | 16  |
| <i>Clostridium difficile</i><br>Canadian hypervirulent ribotype 027 human <sup>3</sup>                                                                                                       |                 |                 | M7404             |                   |                    |                  | 2-4 |
| <i>Clostridium difficile</i><br>U.K. hypervirulent ribotype 027 human strain <sup>3</sup>                                                                                                    |                 |                 | R20291            |                   |                    |                  | 2-4 |
| <i>Clostridium difficile</i><br>variant toxin B ribotype 017 human (no Toxin A) <sup>3</sup>                                                                                                 |                 |                 | 1470              |                   |                    |                  | 2-4 |
| <i>Clostridium difficile</i> ribotype RT078, US animal strain, infects humans. Produces third toxin, CDT <sup>3</sup>                                                                        |                 |                 | JGS6133           |                   |                    |                  | 2-4 |
| <i>Clostridium difficile</i> ribotype RT237 Australian animal strain, infects humans. Uncommon toxin profile of Toxin A negative, Toxin B positive, CDT (binary toxin) positive <sup>3</sup> |                 |                 | AI35              |                   |                    |                  | 2-4 |
|                                                                                                                                                                                              | Strain          |                 |                   | CBD +<br>5%LHB    | Erythro-<br>mycin  | Clinda-<br>mycin | CBD |
| <i>Cutibacterium acnes</i> <sup>2</sup>                                                                                                                                                      | MMX 9991        |                 |                   | 8                 | 0.03               | 0.12             | 1   |
| <i>Cutibacterium acnes</i> <sup>2</sup>                                                                                                                                                      | MMX 9994        |                 |                   | 16                | 4                  | 0.03             | 1   |
| <i>Cutibacterium acnes</i> <sup>2</sup>                                                                                                                                                      | MMX 9995        |                 |                   | 16                | 0.03               | 0.06             | 2   |
| <i>Cutibacterium acnes</i> <sup>2</sup>                                                                                                                                                      | MMX 9997        |                 |                   | 16                | 0.03               | 0.03             | 2   |
| <i>Cutibacterium acnes</i> <sup>2</sup>                                                                                                                                                      | MMX 9999        |                 |                   | 16                | 0.03               | 0.5              | 1   |
| <i>Bacteroides fragilis</i> <sup>2</sup>                                                                                                                                                     | ATCC 25285      |                 |                   | 32                | 4                  | 0.5              | 2   |
| <i>Bacteroides thetaiotaomicron</i> <sup>2</sup>                                                                                                                                             | ATCC 29741      |                 |                   | 64                | 8                  | 4                | 4   |

<sup>1</sup>MIC assays at UQ (n = ≥ 4, ≥ 2 independent duplicates)

<sup>2</sup>MIC assays at Micromyx (n = 3, triplicate independent inocula)

<sup>3</sup>MIC assays at Monash (n = 2)

ERY<sup>R</sup>, erythromycin resistant; MDR, multi-drug resistant; MLS, macrolide-lincosamide-streptoramin resistant; MRSA, methicillin-resistant *S. aureus*; MRSE, methicillin-resistant *S. epidermidis*; MSSA, methicillin-susceptible *S. aureus*; MSSE, methicillin-susceptible *S. epidermidis*; PISP, penicillin-intermediate *S. pneumoniae*; PRSP, penicillin-resistant *S. pneumoniae*; VRE, vancomycin-resistant enterococci; VSE, vancomycin-susceptible enterococci;

Supplementary Table 2. *S. aureus* MIC90 (ATCC and Australian clinical isolates, n = 4)

| Strain |             |                             | MIC ( $\mu\text{g mL}^{-1}$ ) (individual values, and average) |     |     |            |      |     |           |   |     |             |      |       |       | CBD   |      |       |       |       |       |       |       |       |   |     |   |   |   |
|--------|-------------|-----------------------------|----------------------------------------------------------------|-----|-----|------------|------|-----|-----------|---|-----|-------------|------|-------|-------|-------|------|-------|-------|-------|-------|-------|-------|-------|---|-----|---|---|---|
|        |             |                             | Vancomycin                                                     |     |     | Daptomycin |      |     | Mupirocin |   |     | Clindamycin |      |       |       |       |      |       |       |       |       |       |       |       |   |     |   |   |   |
| MSSA   | ATCC 25923  | Control                     | 2                                                              | 1   | 1   | 8          | 2    | 2   | 2         | 2 | 2   | 0.5         | 0.5  | 0.5   | 1     | 0.5   | 0.06 | 0.06  | 0.06  | 0.125 | 0.06  | 2     | 2     | 1     | 1 | 2   |   |   |   |
| MSSA   | 404556145   | Clinical Isolate            | 2                                                              | 1   | 1   | 1          | 1    | 4   | 2         | 2 | 2   | 2           | 0.5  | 0.5   | 0.5   | 0.5   | 0.5  | 64    | 64    | 64    | 64    | 64    | 2     | 2     | 2 | 2   | 2 |   |   |
| MSSA   | 405575036   | Clinical Isolate            | 1                                                              | 1   | 1   | 1          | 1    | 2   | 2         | 1 | 2   | 2           | 0.25 | 0.25  | 0.5   | 0.5   | 0.5  | 0.5   | 0.125 | 0.125 | 0.125 | 0.125 | 0.125 | 2     | 2 | 1   | 1 | 2 |   |
| MSSA   | 406626061   | Clinical Isolate            | 0.5                                                            | 0.5 |     |            | 0.5  | 2   | 2         |   |     | 2           | 0.25 | 0.5   |       |       | 0.5  | 0.125 | 0.06  |       | 0.125 | 0.125 | 2     | 2     |   |     | 2 |   |   |
| MSSA   | 422940878   | Clinical Isolate            | 1                                                              | 1   | 2   | 1          | 1    | 2   | 2         | 2 |     | 2           | 0.5  | 0.5   | 0.25  | 0.25  | 0.5  | 0.125 | 0.125 | 0.125 | 0.125 | 0.125 | 2     | 2     | 1 | 1   | 2 |   |   |
| MSSA   | 405573757   | Clinical Isolate            | 1                                                              | 1   | 1   | 1          | 1    | 2   | 2         | 2 | 2   | 2           | 0.5  | 0.5   | 0.25  | 0.25  | 0.25 | 0.125 | 0.125 | 0.06  | 0.06  | 0.125 | 2     | 2     | 2 | 2   | 2 |   |   |
| MSSA   | ATCC 29213  | Control                     | 1                                                              | 1   | 1   | 1          | 1    | 2   | 2         | 2 | 1   | 2           | 0.25 | 0.25  | 0.25  | 0.5   | 0.25 | 0.06  | 0.06  | 0.06  | 0.125 | 0.06  | 2     | 2     | 1 | 1   | 2 |   |   |
| MSSA   | M30538      | Clinical Isolate            | Trachey swab                                                   | 1   | 1   | 1          | 1    | 1   | 2         | 1 | 1   | 1           | 1    | 0.5   | 0.5   | 0.5   | 0.5  | 0.5   | 0.125 | 0.06  | 0.125 | 0.125 | 0.125 | 2     | 2 | 1   | 1 | 2 |   |
| MSSA   | M31394      | Clinical Isolate            | Finger                                                         | 1   | 1   | 1          | 1    | 1   | 1         | 1 | 2   | 2           | 1    | 0.25  | 0.25  | 0.5   | 0.5  | 0.5   | 0.03  | 0.03  | 0.125 | 0.125 | 0.125 | 2     | 2 | 1   | 1 | 2 |   |
| MSSA   | M31634      | Clinical Isolate            | Toe                                                            | 1   | 0.5 | 1          | 1    | 1   | 1         | 1 | 1   | 1           | 1    | 0.25  | 0.25  | 0.5   | 0.25 | 0.25  | 0.03  | 0.06  | 0.06  | 0.125 | 0.06  | 1     | 1 | 1   | 1 | 1 |   |
| MSSA   | M31907      | Clinical Isolate            | Abdo fluid                                                     | 1   | 1   | 1          | 1    | 1   | 1         | 1 | 2   | 2           | 2    | 0.25  | 0.25  | 0.25  | 0.25 | 0.25  | 0.06  | 0.125 | 0.06  | 0.05  | 0.06  | 2     | 2 | 2   | 1 | 2 |   |
| MSSA   | M32158      | Clinical Isolate            | Pressure Area                                                  | 1   | 1   | 1          | 1    | 1   | 1         | 1 | 2   | 2           | 2    | 0.25  | 0.25  | 0.5   | 0.25 | 0.25  | 0.03  | 0.03  | 0.06  | 0.125 | 0.125 | 2     | 2 | 2   | 2 | 2 |   |
| MSSA   | M32158      | Clinical Isolate            | Toe                                                            | 0.5 | 1   | 1          | 1    | 1   | 2         | 1 | 2   | 2           | 2    | 0.5   | 0.5   | 1     | 0.5  | 0.5   | 0.125 | 0.125 | 0.06  | 0.125 | 0.125 | 2     | 2 | 1   | 1 | 2 |   |
| MSSA   | M34027      | Clinical Isolate            | Ankle                                                          | 0.5 | 0.5 | 1          | 1    | 1   | 2         | 1 | 4   | 4           | 4    | 0.25  | 0.25  | 0.25  | 0.25 | 0.25  | 0.125 | 0.125 | 0.125 | 0.125 | 0.125 | 2     | 2 | 1   | 1 | 2 |   |
| MSSA   | M34575      | Clinical Isolate            | Wound                                                          | 1   | 1   | 1          | 1    | 1   | 2         | 2 | 2   | 2           | 2    | 0.25  | 0.25  | 0.5   | 0.5  | 0.5   | 0.03  | 0.03  | 0.125 | 0.06  | 0.125 | 2     | 2 | 1   | 1 | 2 |   |
| MSSA   | M34591      | Clinical Isolate            | Neck                                                           | 1   | 1   | 1          | 1    | 1   | 1         | 2 | 2   | 2           | 2    | 0.5   | 0.5   | 0.5   | 0.25 | 0.5   | 0.125 | 0.125 | 0.06  | 0.125 | 0.125 | 2     | 2 | 1   | 1 | 2 |   |
| MSSA   | M34593      | Clinical Isolate            | Wound                                                          | 1   | 1   | 1          | 1    | 1   | 2         | 2 | 2   | 2           | 2    | 0.5   | 0.5   | 0.5   | 0.5  | 0.5   | 0.125 | 0.125 | 125   | 0.125 | 0.125 | 2     | 2 | 1   | 1 | 2 |   |
| MSSA   | M35252      | Clinical Isolate            | ETA                                                            | 1   | 1   | 1          | 2    | 1   | 1         | 1 | 1   | 2           | 1    | 0.5   | 0.5   | 0.5   | 0.25 | 0.5   | 0.25  | 0.25  | 0.125 | 0.25  | 0.125 | 2     | 2 | 1   | 1 | 2 |   |
| MSSA   | M35254      | Clinical Isolate            | ETA                                                            | 0.5 | 1   | 1          | 1    | 1   | 1         | 1 | 1   | 1           | 1    | 0.5   | 0.5   | 0.5   | 0.25 | 0.5   | 0.125 | 0.03  | 0.06  | 0.06  | 0.06  | 2     | 2 | 2   | 1 | 2 |   |
| MSSA   | M35255      | Clinical Isolate            | ETA                                                            | 1   | 1   |            |      | 1   | 1         | 1 |     |             | 1    | 0.5   | 0.25  |       |      | 0.5   | 0.06  | 0.03  |       | 0.06  | 0.06  | 2     | 2 |     |   | 2 |   |
| MSSA   | M35264      | Clinical Isolate            | Arm                                                            | 1   | 1   | 1          |      | 1   | 2         | 2 | 2   |             | 2    | 0.25  | 0.25  | 0.5   |      | 0.25  | 0.125 | 0.03  | 0.06  |       | 0.06  | 2     | 2 | 2   |   | 2 |   |
| MSSA   | M35268      | Clinical Isolate            | Trachey swab                                                   | 1   | 1   | 1          |      | 1   | 2         | 2 | 2   |             | 2    | 0.5   | 0.25  | 2     |      | 0.5   | 0.125 | 0.125 | 0.5   |       | 0.125 | 2     | 2 | 1   |   | 2 |   |
| MSSA   | M35491      | Clinical Isolate            | Fluid Neck                                                     | 1   | 1   | 1          | 1    | 1   | 2         | 2 | 1   | 2           | 2    | 0.5   | 0.5   | 0.5   | 0.5  | 0.5   | 0.125 | 0.06  | 0.125 | 0.125 | 0.125 | 0.125 | 2 | 2   | 2 | 2 | 2 |
| MSSA   | M35953      | Clinical Isolate            | Abscess                                                        | 1   | 1   | 1          | 1    | 1   | 1         | 1 | 1   | 1           | 1    | 0.5   | 1     | 0.5   | 0.5  | 0.5   | 0.06  | 0.125 | 0.03  | 0.03  | 0.03  | 0.125 | 2 | 2   | 1 | 1 | 2 |
| MSSA   | M36523      | Clinical Isolate            | Urine                                                          | 1   | 1   | 2          | 1    | 1   | 2         | 2 | 2   | 2           | 2    | 0.125 | 0.125 | 0.06  | 0.06 | 0.125 | 0.06  | 0.06  | 0.03  | 0.03  | 0.06  | 1     | 1 | 0.5 | 1 | 1 |   |
| MSSA   | M37410      | Clinical Isolate            | Abscess                                                        | 1   | 1   | 1          | 1    | 1   | 1         | 1 | 2   | 2           | 2    | 64    | 64    | 64    | 64   | 64    | 64    | 64    | 64    | 64    | 64    | 2     | 2 | 2   | 1 | 2 |   |
| MRSA   | 414149225   | Clinical Isolate            |                                                                | 1   | 1   | 1          | 0.25 | 1   | 2         | 2 | 0.5 | 0.25        | 2    | 2     | 0.5   | 0.125 | 0.25 | 2     | 0.125 | 0.125 | 0.06  | 0.125 | 0.125 | 2     | 2 | 1   | 1 | 2 |   |
| MRSA   | 405574456   | Clinical Isolate; Resistant |                                                                | 2   | 1   | 2          | 1    | 2   | 2         | 4 | 2   | 2           | 2    | 0.5   | 0.5   | 0.5   | 0.5  | 0.5   | 64    | 64    | 64    | 64    | 64    | 2     | 2 | 1   | 1 | 2 |   |
| MRSA   | ATCC 43300  | Resistant                   |                                                                | 1   | 1   | 1          | 1    | 1   | 2         | 2 | 1   | 1           | 2    | 0.5   | 0.5   | 0.5   | 0.5  | 0.5   | 64    | 64    | 64    | 64    | 64    | 2     | 2 | 1   | 1 | 2 |   |
| MRSA   | ATCC 33591  | Resistant                   |                                                                | 2   | 2   | 1          | 1    | 2   | 2         | 2 | 2   | 2           | 2    | 0.5   | 0.5   | 0.5   | 0.5  | 0.5   | 64    | 64    | 64    | 64    | 64    | 2     | 2 | 2   | 2 | 2 |   |
| MRSA   | NRS 119     | Resistant                   |                                                                | 2   | 2   | 1          | 2    | 2   | 4         | 4 | 2   | 4           | 4    | 0.25  | 0.25  | 0.5   | 0.5  | 0.5   | 1     | 1     | 1     | 1     | 1     | 2     | 2 | 1   | 1 | 2 |   |
| MRSA   | NRS 384     | Resistant                   |                                                                | 1   | 1   | 1          | 1    | 1   | 2         | 2 | 2   | 1           | 2    | 0.5   | 0.25  | 0.25  | 0.5  | 0.5   | 0.03  | 0.06  | 0.06  | 0.06  | 0.06  | 2     | 2 | 1   | 1 | 2 |   |
| MRSA   | 581101692:1 | Clinical Isolate; Resistant |                                                                | 1   | 2   | 2          |      | 2   | 2         | 4 | 4   |             | 4    | 0.5   | 0.5   | 0.5   |      | 0.5   | 64    | 64    | 64    |       | 64    | 2     | 2 | 2   |   | 2 |   |
| MRSA   | 581101692:2 | Clinical Isolate; Resistant |                                                                | 4   | 2   | 2          | 2    | 2   | 4         | 2 | 4   | 4           | 4    | 0.5   | 0.5   | 0.25  | 0.5  | 0.5   | 64    | 64    | 64    | 64    | 64    | 4     | 2 | 2   | 2 | 2 |   |
| MRSA   | 581101692:3 | Clinical Isolate; Resistant |                                                                | 2   | 1   | 2          | 2    | 2   | 2         | 4 | 4   | 4           | 4    | 0.5   | 0.5   | 0.25  | 0.5  | 0.5   | 64    | 64    | 64    | 64    | 64    | 2     | 2 | 2   | 2 | 2 |   |
| MRSA   | 50316-0509  | Clinical Isolate; Resistant |                                                                | 1   | 1   | 1          | 1    | 1   | 2         | 2 | 2   | 2           | 2    | 0.25  | 0.25  | 0.25  | 0.5  | 0.25  | 4     | 4     | 0.125 | 0.125 | 4     | 2     | 2 | 2   | 2 | 2 |   |
| MRSA   | 51418-7407  | Clinical Isolate; Resistant |                                                                | 1   | 1   | 1          | 1    | 1   | 1         | 2 | 1   |             | 1    | 0.5   | 0.5   | 0.5   |      | 0.5   | 0.125 | 0.125 | 0.125 | 0.125 | 0.125 | 2     | 2 | 2   | 2 | 2 |   |
| MRSA   | 49496-1320  | Clinical Isolate; Resistant |                                                                | 1   | 1   | 1          |      | 1   | 1         | 1 | 2   | 1           | 1    | 0.25  | 0.5   | 0.5   | 0.5  | 0.5   | 0.06  | 0.06  | 0.125 | 0.125 | 0.125 | 2     | 2 | 2   | 2 | 2 |   |
| MRSA   | M33376      | Clinical Isolate; Resistant | Fluid Peritoneal                                               | 0.5 | 1   | 1          | 1    | 1   | 2         | 2 | 2   | 2           | 2    | 64    | 64    | 64    | 64   | 64    | 64    | 64    | 64    | 64    | 64    | 2     | 2 | 2   | 2 | 2 |   |
| MRSA   | M35249      | Clinical Isolate; Resistant | ETA                                                            | 1   | 1   | 1          |      | 1   | 1         | 2 | 2   |             | 2    | 0.25  | 0.25  | 0.25  |      | 0.25  | 0.03  | 0.06  | 0.125 | 0.125 | 0.125 | 2     | 1 | 1   |   | 1 |   |
| MRSA   | M38184      | Clinical Isolate; Resistant | Wound                                                          | 1   | 1   | 2          | 1    | 1   | 1         | 1 | 2   | 2           | 2    | 0.25  | 0.25  | 0.25  | 0.25 | 0.25  | 0.125 | 0.125 | 0.125 | 0.125 | 0.125 | 2     | 2 | 4   | 2 | 2 |   |
| MRSA   | M31414      | Clinical Isolate; Resistant | Sternal Wd                                                     | 1   | 1   | 1          | 1    | 1   | 2         | 2 | 1   | 2           | 2    | 0.06  | 0.125 | 0.25  | 0.5  | 0.125 | 64    | 64    | 64    | 64    | 64    | 1     | 2 | 2   | 2 | 2 |   |
| MRSA   | M38509      | Clinical Isolate; Resistant | Abscess                                                        | 1   | 0.5 | 0.5        |      | 0.5 | 1         | 1 | 1   |             | 1    | 0.25  | 0.25  | 0.25  |      | 0.25  | 0.03  | 0.03  | 0.06  | 0.03  | 0.03  | 2     | 2 | 2   |   | 2 |   |

|      |         |                             |         |     |   |   |   |   |       |     |      |     |   |     |       |       |      |       |       |       |       |       |       |       |       |   |   |   |   |   |
|------|---------|-----------------------------|---------|-----|---|---|---|---|-------|-----|------|-----|---|-----|-------|-------|------|-------|-------|-------|-------|-------|-------|-------|-------|---|---|---|---|---|
| MRSA | M39864  | Clinical Isolate; Resistant | Wound   | 1   | 1 | 1 | 1 | 1 | 1     | 2   | 1    | 1   | 1 | 1   | 0.25  | 0.25  | 0.25 | 0.25  | 0.25  | 0.03  | 0.06  | 0.03  | 0.03  | 0.03  | 1     | 1 | 2 | 1 | 1 |   |
| MRSA | M40725  | Clinical Isolate; Resistant | Wound   | 1   | 1 | 1 | 1 | 1 | 2     | 2   | 1    | 1   | 2 | 2   | 2     | 1     | 1    | 1     | 1     | 0.03  | 0.06  | 0.03  | 0.03  | 0.03  | 0.03  | 2 | 2 | 2 | 2 | 2 |
| MRSA | M45447  | Clinical Isolate; Resistant | CSF     | 1   | 1 | 1 | 1 | 1 | 1     | 1   | 1    | 1   | 1 | 1   | 0.25  | 0.25  | 0.25 | 0.25  | 0.25  | 0.06  | 0.03  | 0.06  | 0.06  | 0.06  | 0.06  | 4 | 2 | 2 | 2 | 2 |
| MRSA | M48439  | Clinical Isolate; Resistant | Abscess | 1   | 1 |   |   | 1 | 1     | 1   |      |     |   | 1   | 0.25  | 0.25  |      |       | 0.25  | 0.03  | 0.03  |       |       | 0.03  | 2     | 4 |   |   | 4 |   |
| MRSA | M49406  | Clinical Isolate; Resistant | Wound   | 1   | 1 | 1 | 1 | 1 | 1     | 2   | 1    | 1   | 1 | 1   | 0.25  | 0.25  | 0.5  | 0.5   | 0.5   | 0.125 | 0.125 | 64    | 0.06  | 0.125 | 4     | 2 | 2 | 2 | 2 |   |
| MRSA | M51977  | Clinical Isolate; Resistant | Wound   | 1   | 1 | 1 | 1 | 1 | 2     | 2   | 2    | 2   | 2 | 2   | 0.25  | 0.25  | 0.5  | 0.5   | 0.5   | 64    | 64    | 64    | 64    | 64    | 64    | 2 | 2 | 2 | 2 | 2 |
| MRSA | M52817  | Clinical Isolate; Resistant | Wound   | 1   | 1 | 1 | 1 | 1 | 2     | 2   | 1    | 2   | 2 | 2   | 0.25  | 0.25  | 0.25 | 0.25  | 0.25  | 0.03  | 0.125 | 0.125 | 0.06  | 0.125 | 2     | 4 | 2 | 2 | 2 |   |
| MRSA | M54307  | Clinical Isolate; Resistant | Wound   | 1   | 1 | 1 | 1 | 1 | 0.125 | 1   | 1    |     |   | 1   | 0.03  | 0.5   | 0.5  |       |       | 0.03  | 0.125 | 0.125 |       | 0.125 | 4     | 2 | 2 |   | 2 |   |
| MRSA | M53519  | Clinical Isolate; Resistant | Abscess | 0.5 | 1 | 1 | 1 | 1 | 4     | 1   | 1    | 1   | 1 | 1   | 64    | 64    | 64   | 64    | 64    | 8     | 0.03  | 0.125 | 0.06  | 0.125 | 4     | 4 | 2 | 2 | 4 |   |
| MRSA | M55707  | Clinical Isolate; Resistant | Wound   | 1   | 1 | 1 | 1 | 1 | 2     | 2   | 1    | 2   | 2 | 2   | 0.25  | 0.25  | 0.5  | 0.25  | 0.25  | 0.125 | 0.03  | 0.125 | 0.06  | 0.125 | 4     | 2 | 2 | 2 | 2 |   |
| MRSA | M56123  | Clinical Isolate; Resistant | Wound   | 1   | 1 | 1 | 1 | 1 | 4     | 2   | 1    | 1   | 2 | 2   | 0.25  | 0.5   | 0.5  | 0.5   | 0.5   | 32    | 0.125 | 0.125 | 0.125 | 0.125 | 0.125 | 2 | 2 | 2 | 2 | 2 |
| MRSA | M48662  | Clinical Isolate; Resistant | Ulcer   | 1   | 1 |   |   | 1 | 1     | 1   |      |     |   | 1   | 0.5   | 0.5   |      |       | 0.5   | 64    | 64    |       |       | 64    | 2     | 2 |   |   | 2 |   |
| MRSA | M49378  | Clinical Isolate; Resistant | Wound   | 1   | 1 |   |   | 1 | 2     | 1   |      |     |   | 2   | 0.25  | 0.25  |      |       | 0.25  | 0.06  | 0.125 |       |       | 0.125 | 4     | 2 |   |   | 4 |   |
| MRSA | M49411  | Clinical Isolate; Resistant | Wound   | 1   | 1 | 1 | 1 | 1 | 1     | 2   | 1    | 1   | 1 | 1   | 0.125 | 0.25  | 0.25 | 0.25  | 0.25  | 0.03  | 0.06  | 0.03  | 0.03  | 0.03  | 0.03  | 2 | 4 | 2 | 2 | 2 |
| MRSA | M56924  | Clinical Isolate; Resistant | Wound   | 1   | 1 |   |   | 1 | 1     | 2   |      |     |   | 2   | 0.5   | 0.25  |      |       | 0.5   | 0.125 | 0.125 |       |       | 0.125 | 2     | 1 |   |   | 2 |   |
| MRSA | M57543  | Clinical Isolate; Resistant | Wound   | 1   | 2 |   |   | 2 | 2     | 2   |      |     |   | 2   | 0.25  | 0.5   |      |       | 0.5   | 64    | 64    |       |       | 64    | 4     | 4 |   |   | 4 |   |
| MRSA | M57544  | Clinical Isolate; Resistant | Wound   | 1   | 1 | 1 | 1 | 1 | 1     | 2   | 1    | 1   | 1 | 1   | 0.25  | 0.25  | 0.5  | 0.5   | 0.5   | 0.06  | 0.06  | 0.06  | 0.06  | 0.06  | 0.06  | 4 | 4 | 2 | 2 | 4 |
| MRSA | M59014  | Clinical Isolate; Resistant | Wound   | 1   | 1 | 1 |   | 1 | 2     | 2   | 1    |     |   | 2   | 0.25  | 0.25  | 0.25 |       | 0.25  | 0.125 | 0.06  | 0.125 |       | 0.125 | 4     | 4 | 2 |   | 4 |   |
| MRSA | M60609  | Clinical Isolate; Resistant | Wound   | 1   | 1 | 1 | 1 | 1 | 4     | 1   | 2    | 1   | 1 | 1   | 0.25  | 0.25  | 0.25 | 0.5   | 0.25  | 0.03  | 0.03  | 0.125 | 0.06  | 0.125 | 2     | 4 | 2 | 1 | 2 |   |
| MRSA | M76385  | Clinical Isolate; Resistant | Wound   | 1   | 1 |   |   | 1 | 2     | 1   |      |     |   | 2   | 4     | 0.5   |      |       | 4     | 8     | 4     |       |       | 8     | 4     | 2 |   |   | 4 |   |
| MRSA | M61448  | Clinical Isolate; Resistant | Wound   | 1   | 1 | 1 |   | 1 | 2     | 2   | 2    |     |   | 2   | 0.25  | 0.25  | 0.25 |       | 0.25  | 0.06  | 0.03  | 0.06  |       | 0.06  | 0.5   | 2 | 1 |   | 1 |   |
| MRSA | M63450  | Clinical Isolate; Resistant | Wound   | 1   | 2 | 1 |   | 1 | 2     | 2   | 0.25 |     |   | 2   | 0.5   | 0.25  | 0.5  |       | 0.5   | 64    | 64    | 64    |       | 64    | 2     | 2 | 2 |   | 2 |   |
| MRSA | M74145  | Clinical Isolate; Resistant | Tissue  | 1   | 1 | 1 | 1 | 1 | 4     | 4   | 4    | 4   | 4 | 4   | 0.25  | 0.25  | 0.25 | 0.5   | 0.25  | 1     | 1     | 1     | 1     | 1     | 8     | 8 | 8 | 8 | 8 |   |
| MRSA | M74568  | Clinical Isolate; Resistant | Ulcer   | 1   | 1 | 1 | 1 | 1 | 2     | 2   | 1    | 1   | 2 | 2   | 0.5   | 0.25  | 0.25 | 0.25  | 0.25  | 0.06  | 0.125 | 0.03  | 0.03  | 0.125 | 2     | 2 | 2 | 2 | 2 |   |
| MRSA | M75365  | Clinical Isolate; Resistant | Abscess | 1   | 1 |   |   | 1 | 2     | 1   |      |     |   | 2   | 0.25  | 0.25  |      |       | 0.25  | 0.03  | 0.03  |       |       | 0.03  | 4     | 2 |   |   | 4 |   |
| MRSA | M76558  | Clinical Isolate; Resistant | Wd      | 2   | 1 | 1 | 2 | 2 | 2     | 2   | 2    | 2   | 2 | 2   | 0.25  | 0.5   | 0.5  | 0.5   | 0.5   | 64    | 64    | 64    | 64    | 64    | 64    | 4 | 2 | 2 | 2 | 2 |
| MRSA | M77399  | Clinical Isolate; Resistant | Tissue  | 1   | 1 | 1 | 1 | 1 | 2     | 4   | 2    | 2   | 2 | 2   | 64    | 64    | 64   | 64    | 64    | 0.06  | 0.06  | 0.125 | 0.25  | 0.125 | 4     | 2 | 2 | 2 | 2 |   |
| MRSA | M78036  | Clinical Isolate; Resistant | Wound   | 1   | 1 | 1 |   | 1 | 2     | 2   | 1    |     |   | 2   | 0.25  | 0.25  | 0.25 |       | 0.25  | 0.125 | 0.06  | 0.125 |       | 0.125 | 2     | 4 | 2 |   | 2 |   |
| MRSA | M78540  | Clinical Isolate; Resistant | Wound   | 1   | 1 | 1 | 1 | 1 | 2     | 2   | 2    | 2   | 2 | 2   | 0.125 | 0.25  | 0.5  | 0.5   | 0.5   | 0.03  | 0.06  | 0.125 | 0.125 | 0.125 | 4     | 4 | 2 | 2 | 4 |   |
| MRSA | M81239  | Clinical Isolate; Resistant | Wound   | 1   | 1 | 1 | 1 | 1 | 2     | 2   | 1    | 1   | 2 | 2   | 0.5   | 0.5   | 0.5  | 0.25  | 0.25  | 0.03  | 0.06  | 0.03  | 0.03  | 0.03  | 0.03  | 4 | 4 | 2 | 2 | 4 |
| MRSA | M81986  | Clinical Isolate; Resistant | Wound   | 1   | 1 | 1 | 1 | 1 | 1     | 2   | 1    | 1   | 1 | 1   | 0.5   | 0.5   | 0.5  | 0.25  | 0.5   | 0.06  | 0.03  | 0.125 | 0.03  | 0.125 | 4     | 4 | 2 | 2 | 4 |   |
| MRSA | M82747  | Clinical Isolate; Resistant | Wound   | 1   | 1 | 1 | 1 | 1 | 2     | 2   | 1    | 1   | 2 | 2   | 0.125 | 0.25  | 0.5  | 0.125 | 0.5   | 0.03  | 0.06  | 0.03  | 0.06  | 0.06  | 0.06  | 4 | 4 | 2 | 2 | 4 |
| MRSA | M85049  | Clinical Isolate; Resistant | Wound   | 1   | 1 | 1 |   | 1 | 2     | 1   | 1    |     |   | 1   | 0.5   | 0.06  | 0.25 |       | 0.25  | 0.03  | 0.03  | 0.125 |       | 0.03  | 4     | 2 | 2 |   | 2 |   |
| MRSA | M85511  | Clinical Isolate; Resistant | Wound   | 2   | 2 | 1 | 1 | 2 | 2     | 2   | 1    | 1   | 2 | 2   | 0.25  | 0.25  | 0.25 | 0.25  | 0.25  | 64    | 64    | 64    | 64    | 64    | 64    | 2 | 2 | 2 | 2 | 2 |
| MRSA | M78411  | Clinical Isolate; Resistant | Abscess | 1   | 1 |   |   | 1 | 2     | 2   |      |     |   | 2   | 0.5   | 0.5   |      |       | 0.5   | 0.03  | 0.125 |       |       | 0.125 | 4     | 2 |   |   | 4 |   |
| MRSA | M87512  | Clinical Isolate; Resistant | Wound   | 1   | 1 | 1 | 1 | 1 | 2     | 2   | 1    | 1   | 2 | 2   | 0.5   | 0.5   | 0.5  | 0.5   | 0.5   | 0.06  | 0.06  | 0.06  | 0.03  | 0.06  | 4     | 4 | 2 | 2 | 4 |   |
| MRSA | M90736  | Clinical Isolate; Resistant | Wound   | 2   | 2 |   |   | 2 | 2     | 2   |      |     |   | 2   | 0.25  | 0.25  |      |       | 0.25  | 64    | 64    |       |       | 64    | 4     | 4 |   |   | 4 |   |
| MRSA | M89569  | Clinical Isolate; Resistant | Wound   | 1   | 1 | 1 |   | 1 | 1     | 2   | 1    |     |   | 1   | 0.5   | 0.5   | 0.5  |       | 0.5   | 64    | 64    | 64    |       | 64    | 2     | 2 | 2 |   | 2 |   |
| MRSA | M88418  | Clinical Isolate; Resistant | Wound   | 1   | 1 | 1 |   | 1 | 2     | 2   | 1    |     |   | 2   | 0.25  | 0.25  | 0.25 |       | 0.25  | 0.03  | 0.06  | 0.06  |       | 0.06  | 2     | 2 | 2 |   | 2 |   |
| MRSA | M88210  | Clinical Isolate; Resistant | Wound   | 1   | 1 | 1 | 1 | 1 | 1     | 2   | 1    | 1   | 1 | 1   | 0.5   | 0.5   | 0.5  | 0.5   | 0.5   | 0.06  | 0.06  | 8     | 0.06  | 0.06  | 2     | 2 | 1 | 1 | 2 |   |
| MRSA | M97784  | Clinical Isolate; Resistant | Abscess | 1   | 1 | 1 |   | 1 | 2     | 1   | 1    |     |   | 1   | 0.25  | 0.5   | 0.5  |       | 0.5   | 0.125 | 0.06  | 0.06  |       | 0.06  | 4     | 2 | 2 |   | 2 |   |
| MRSA | M97166  | Clinical Isolate; Resistant | Wound   | 1   | 1 |   |   | 1 | 1     | 1   |      |     |   | 1   | 0.5   | 0.5   |      |       | 0.5   | 0.125 | 0.125 |       |       | 0.125 | 2     | 2 |   |   | 2 |   |
| MRSA | M96912  | Clinical Isolate; Resistant | Wound   | 1   | 1 | 1 |   | 1 | 2     | 0.5 | 0.5  |     |   | 0.5 | 0.5   | 0.5   | 0.5  |       | 0.5   | 64    | 64    | 64    |       | 64    | 4     | 2 | 2 |   | 2 |   |
| MRSA | M234215 | Clinical Isolate; Resistant | Sputum  | 1   | 1 | 1 |   | 1 | 2     | 0.5 | 0.5  |     |   | 0.5 | 0.5   | 0.5   | 0.5  |       | 0.125 | 0.125 | 0.125 |       | 0.125 | 4     | 2     | 2 |   | 2 |   |   |
| MRSA | M121493 | Clinical Isolate; Resistant | Wound   | 2   | 2 | 1 | 1 | 2 | 4     | 4   | 8    | 4   | 4 | 4   | 0.5   | 0.25  | 0.25 | 0.5   | 0.5   | 64    | 64    | 64    | 32    | 64    | 4     | 2 | 4 | 2 | 4 | 4 |
| MRSA | M69739  | Clinical Isolate; Resistant | Wound   | 1   | 1 | 1 | 1 | 1 | 2     | 2   | 0.5  | 0.5 | 2 | 2   | 0.5   | 0.5   | 0.5  | 0.25  | 0.5   | 0.06  | 0.06  | 0.06  | 0.06  | 0.06  | 4     | 4 | 2 | 2 | 4 |   |
| MRSA | M69740  | Clinical Isolate; Resistant | Abscess | 1   | 1 | 1 | 1 | 1 | 2     | 2   | 2    | 4   | 2 | 2   | 0.5   | 0.125 | 0.25 | 0.25  | 0.25  | 64    | 64    | 64    | 64    | 64    | 64    | 4 | 4 | 2 | 2 | 4 |
| MRSA | M70241  | Clinical Isolate; Resistant | Wound   | 1   | 1 | 1 |   | 1 | 0.5   | 1   | 1    |     |   | 1   | 64    | 0.25  | 0.25 |       | 0.25  | 0.06  | 0.06  | 0.06  |       | 0.06  | 2     | 1 | 2 |   | 2 |   |
| MRSA | M70964  | Clinical Isolate; Resistant | Wound   | 1   | 1 | 1 | 1 | 1 | 1     | 2   | 1    | 1   | 1 | 1   | 0.25  | 0.25  | 0.5  | 0.25  | 0.25  | 0.06  | 2     | 0.06  | 0.06  | 0.06  | 0.06  | 2 | 2 | 1 | 1 | 2 |



|      |                          |                             |         |     |     |    |    |    |     |     |    |    |    |       |       |       |       |       |       |       |       |       |       |       |       |     |     |     |     |     |
|------|--------------------------|-----------------------------|---------|-----|-----|----|----|----|-----|-----|----|----|----|-------|-------|-------|-------|-------|-------|-------|-------|-------|-------|-------|-------|-----|-----|-----|-----|-----|
| MRSA | M71121                   | Clinical Isolate; Resistant | Abscess | 1   | 1   | 1  | 1  | 1  | 1   | 0.5 | 1  | 1  | 1  | 1     | 1     | 0.5   | 0.25  | 0.25  | 0.25  | 1     | 2     | 0.125 | 0.03  | 0.6   | 0.125 | 2   | 2   | 2   | 2   | 2   |
| MRSA | M71122                   | Clinical Isolate; Resistant | Wound   | 1   | 1   | 1  | 1  | 1  | 0.5 | 0.5 | 1  | 1  | 1  | 0.06  | 0.125 | 0.125 | 0.25  | 0.25  | 0.125 | 0.03  | 0.03  | 0.06  | 0.03  | 0.03  | 0.125 | 1   | 2   | 1   | 2   | 2   |
| MRSA | M72749                   | Clinical Isolate; Resistant | Abscess | 1   | 1   | 1  | 1  | 1  | 0.5 | 0.5 | 1  | 1  | 1  | 0.5   | 0.25  | 0.5   | 0.5   | 0.5   | 0.5   | 0.25  | 0.125 | 0.125 | 0.125 | 0.125 | 0.125 | 2   | 2   | 2   | 2   | 2   |
| MRSA | M72760                   | Clinical Isolate; Resistant | Urine   | 1   | 1   | 2  | 1  | 1  | 8   | 8   | 4  | 4  | 8  | 0.125 | 1     | 0.125 | 0.125 | 0.125 | 0.125 | 64    | 64    | 64    | 64    | 64    | 64    | 2   | 4   | 2   | 2   | 2   |
| MRSA | M73508                   | Clinical Isolate; Mutant    | Abscess | 1   | 1   | 1  | 1  | 1  | 1   | 1   | 1  | 1  | 1  | 0.125 | 0.25  | 0.5   | 0.125 | 0.125 | 0.125 | 0.125 | 0.125 | 0.06  | 0.125 | 0.125 | 2     | 2   | 1   | 1   | 2   |     |
| MRSA | M74801                   | Clinical Isolate; Resistant | Wound   | 0.5 | 0.5 | 1  | 1  | 1  | 0.5 | 0.5 | 1  | 1  | 1  | 0.25  | 0.5   | 0.5   | 0.5   | 0.5   | 0.5   | 0.125 | 0.06  | 0.125 | 0.125 | 0.125 | 0.125 | 2   | 2   | 2   | 2   | 2   |
| MRSA | M74804                   | Clinical Isolate; Resistant | Wound   | 1   | 1   | 1  | 1  | 1  | 1   | 1   | 1  | 1  | 1  | 0.5   | 0.5   | 0.5   | 0.5   | 0.5   | 0.5   | 0.06  | 0.125 | 0.125 | 0.125 | 0.125 | 0.125 | 2   | 2   | 2   | 2   | 2   |
| MRSA | M64647                   | Clinical Isolate; Resistant | Wound   | 0.5 | 0.5 | 1  | 1  | 1  | 1   | 1   | 2  | 1  | 1  | 0.5   | 0.5   | 1     | 0.5   | 0.5   | 0.5   | 0.06  | 0.06  | 0.125 | 0.125 | 0.125 | 0.125 | 2   | 2   | 2   | 2   | 2   |
| MRSA | M65412                   | Clinical Isolate; Resistant | Wound   | 1   | 1   | 1  | 1  | 1  | 2   | 2   | 1  | 1  | 2  | 0.5   | 0.25  | 0.25  | 0.25  | 0.25  | 0.25  | 0.125 | 0.125 | 0.125 | 0.125 | 0.125 | 0.125 | 2   | 2   | 1   | 1   | 2   |
| MRSA | M65412                   | Clinical Isolate; Resistant | Abscess | 0.5 | 1   | 1  | 1  | 1  | 0.5 | 0.5 | 1  | 1  | 1  | 0.5   | 0.5   | 0.5   | 0.5   | 0.5   | 0.5   | 0.125 | 0.125 | 0.06  | 0.06  | 0.06  | 0.125 | 2   | 2   | 2   | 2   | 2   |
| MRSA | M66471                   | Clinical Isolate; Resistant | Abscess | 1   | 1   | 1  | 1  | 1  | 1   | 1   | 1  | 1  | 1  | 0.5   | 0.25  | 0.25  | 0.25  | 0.25  | 0.5   | 0.06  | 0.06  | 0.06  | 0.06  | 0.06  | 0.06  | 1   | 1   | 1   | 1   | 1   |
| MRSA | M66723                   | Clinical Isolate; Resistant | Abscess | 1   | 1   | 1  | 1  | 1  | 1   | 0.5 | 1  | 1  | 1  | 0.25  | 0.25  | 0.25  | 0.25  | 0.25  | 0.25  | 0.06  | 0.125 | 0.06  | 0.06  | 0.06  | 0.06  | 2   | 2   | 2   | 1   | 2   |
| MRSA | M67645                   | Clinical Isolate; Resistant | Abscess | 1   | 1   | 1  | 1  | 1  | 1   | 2   | 1  | 1  | 1  | 0.5   | 0.5   | 0.25  | 0.25  | 0.25  | 0.5   | 0.125 | 0.125 | 0.06  | 0.125 | 0.125 | 0.125 | 2   | 2   | 1   | 2   | 2   |
| MRSA | M67826                   | Clinical Isolate; Resistant | Abscess | 1   | 1   | 1  | 1  | 1  | 0.5 | 1   | 1  | 1  | 1  | 0.25  | 0.5   | 0.25  | 0.25  | 0.25  | 0.25  | 0.03  | 0.06  | 0.03  | 0.03  | 0.03  | 0.03  | 2   | 2   | 2   | 2   | 2   |
| MRSA | M67934                   | Clinical Isolate; Resistant | Abscess | 1   | 1   | 1  | 1  | 1  | 2   | 0.5 | 1  | 1  | 1  | 0.25  | 0.25  | 0.25  | 0.25  | 0.25  | 0.25  | 0.25  | 0.06  | 0.125 | 0.125 | 0.125 | 0.125 | 2   | 2   | 1   | 2   | 2   |
| MRSA | M68334                   | Clinical Isolate; Resistant | Abscess | 1   | 1   | 1  | 1  | 1  | 1   | 0.5 | 2  | 2  | 2  | 0.125 | 0.125 | 0.5   | 0.5   | 0.5   | 0.5   | 0.06  | 0.03  | 0.06  | 0.06  | 0.06  | 0.06  | 2   | 2   | 2   | 1   | 2   |
| MRSA | M69124                   | Clinical Isolate; Resistant | Sputum  | 1   | 0.5 | 1  | 1  | 1  | 1   | 0.5 | 1  | 1  | 1  | 0.25  | 0.25  | 0.25  | 0.25  | 0.25  | 0.25  | 0.03  | 0.125 | 0.06  | 0.06  | 0.06  | 0.06  | 2   | 2   | 1   | 1   | 2   |
| MRSA | M72169                   | Clinical Isolate; Resistant | Wound   | 1   | 1   | 1  | 1  | 1  | 2   | 2   | 2  | 2  | 2  | 0.5   | 0.5   | 0.5   | 0.5   | 0.5   | 0.5   | 0.125 | 0.125 | 0.125 | 0.125 | 0.125 | 0.125 | 2   | 2   | 2   | 2   | 2   |
| MRSA | M72746                   | Clinical Isolate; Resistant | Pus     | 1   | 1   | 1  | 1  | 1  | 1   | 2   | 1  | 1  | 1  | 0.5   | 0.5   | 0.5   | 0.5   | 0.5   | 0.5   | 0.125 | 0.125 | 0.125 | 0.125 | 0.125 | 0.125 | 2   | 2   | 2   | 2   | 2   |
| MRSA | M73705                   | Clinical Isolate; Mutant    | Wound   | 1   | 1   | 1  | 1  | 1  | 1   | 0.5 | 1  | 1  | 1  | 0.25  | 0.5   | 0.5   | 0.5   | 0.5   | 0.5   | 0.125 | 0.03  | 0.125 | 0.125 | 0.125 | 0.125 | 2   | 2   | 1   | 2   | 2   |
| MRSA | M75392                   | Clinical Isolate; Resistant | Abscess | 1   | 1   | 1  | 1  | 1  | 0.5 | 1   | 2  | 2  | 2  | 0.5   | 2     | 0.5   | 0.5   | 0.5   | 0.5   | 0.25  | 8     | 0.125 | 0.125 | 0.125 | 0.125 | 2   | 2   | 1   | 1   | 2   |
| MRSA | M75683                   | Clinical Isolate; Resistant | Wound   | 1   | 1   | 1  | 1  | 1  | 1   | 0.5 | 2  | 2  | 2  | 0.25  | 0.25  | 0.5   | 0.5   | 0.5   | 0.5   | 0.06  | 0.06  | 0.125 | 0.06  | 0.06  | 0.06  | 2   | 2   | 1   | 1   | 2   |
| MRSA | M75856                   | Clinical Isolate; Resistant | Wound   | 1   | 1   | 1  | 1  | 1  | 0.5 | 1   | 2  | 2  | 2  | 0.125 | 0.125 | 0.5   | 0.5   | 0.5   | 0.5   | 0.06  | 0.03  | 0.03  | 0.125 | 0.125 | 0.125 | 2   | 2   | 1   | 1   | 2   |
| MRSA | M75899                   | Clinical Isolate; Resistant | Abscess | 0.5 | 1   | 1  | 1  | 1  | 0.5 | 0.5 | 2  | 1  | 2  | 0.25  | 0.5   | 0.5   | 0.5   | 0.5   | 0.5   | 64    | 64    | 64    | 64    | 64    | 64    | 2   | 2   | 1   | 2   | 2   |
| MRSA | M76067                   | Clinical Isolate; Resistant | Wound   | 1   | 1   | 1  | 1  | 1  | 2   | 2   | 2  | 2  | 2  | 0.125 | 0.125 | 0.5   | 0.5   | 0.5   | 0.125 | 64    | 64    | 64    | 64    | 64    | 64    | 2   | 2   | 2   | 2   | 2   |
| MRSA | M76386                   | Clinical Isolate; Resistant | Abscess | 1   | 1   | 1  | 1  | 1  | 0.5 | 0.5 | 2  | 2  | 2  | 0.25  | 0.25  | 0.25  | 0.25  | 0.25  | 0.25  | 0.06  | 0.06  | 64    | 64    | 64    | 64    | 2   | 2   | 1   | 2   | 2   |
| MRSA | ATCC 43300               | Induced Daptomycin Resist   | -       | 1   | 0.5 | 1  | 1  | 1  | 16  | 16  | 16 | 16 | 16 | 0.25  | 0.25  | 0.5   | 0.5   | 0.5   | 0.5   | 64    | 64    | 64    | 64    | 64    | 64    | 0.5 | 0.2 | 0.2 | 0.2 | 0.2 |
| MRSA | ATCC 43300               | Induced Linezolid Resist    | -       | 2   | 2   | 2  | 2  | 2  | 4   | 4   | 1  | 4  | 4  | 0.25  | 0.25  | 0.5   | 0.5   | 0.5   | 0.5   | 64    | 64    | 64    | 64    | 64    | 64    | 2   | 2   | 2   | 1   | 2   |
| MRSA | ATCC 43300               | Induced Dalbavancin Resist  | -       | 2   | 2   | 1  | 1  | 2  | 4   | 4   | 1  | 2  | 4  | 0.25  | 0.25  | 0.25  | 0.5   | 0.5   | 0.25  | 64    | 64    | 64    | 64    | 64    | 64    | 2   | 2   | 1   | 1   | 2   |
| MRSA | ATCC 6538; FDA 209       | -                           | -       | 1   | 1   | 1  | 1  | 1  | 0.5 | 0.5 | 1  | 1  | 1  | 0.125 | 0.125 | 0.25  | 0.25  | 0.25  | 0.25  | 0.06  | 0.06  | 0.03  | 0.03  | 0.06  | 0.06  | 2   | 2   | 1   | 1   | 2   |
| MRSA | ATCC 43300               | Induced CBD Resist          | -       | 2   | 2   | 2  | 2  | 2  | 1   | 2   | 2  | 2  | 2  | 0.5   | 0.5   | 0.5   | 0.5   | 0.5   | 0.5   | 64    | 64    | 64    | 64    | 64    | 64    | 2   | 2   | 2   | 2   | 2   |
| VISA | NRS 1; Mu50; ATCC 700699 | Resistant (high level GISA) | -       | 8   | 8   | 8  | 8  | 8  | 8   | 8   | 8  | 8  | 8  | 0.5   | 0.25  | 0.25  | 0.25  | 0.25  | 0.25  | 64    | 64    | 64    | 64    | 64    | 64    | 2   | 2   | 2   | 2   | 2   |
| VISA | NRS 2; ATCC 700698       | Resistant                   | -       | 2   | 2   | 1  | 1  | 2  | 4   | 4   | 4  | 2  | 4  | 0.5   | 0.5   | 0.25  | 0.25  | 0.25  | 0.25  | 64    | 64    | 64    | 64    | 64    | 64    | 2   | 2   | 2   | 2   | 2   |
| VISA | NRS 17                   | Resistant                   | -       | 8   | 8   | 8  | 8  | 8  | 8   | 8   | 8  | 8  | 8  | 0.5   | 0.5   | 0.5   | 0.5   | 0.5   | 0.5   | 0.125 | 0.125 | 0.125 | 0.125 | 0.125 | 0.125 | 2   | 2   | 2   | 2   | 2   |
| VISA | NRS 18                   | Resistant                   | -       | 4   | 4   | 4  | 8  | 4  | 4   | 4   | 4  | 8  | 4  | 16    | 16    | 16    | 16    | 16    | 16    | 64    | 64    | 64    | 64    | 64    | 64    | 2   | 2   | 2   | 2   | 2   |
| VISA | NRS 19                   | Resistant                   | -       | 4   | 2   | 2  | 4  | 4  | 4   | 4   | 4  | 4  | 4  | 1     | 1     | 1     | 1     | 1     | 1     | 64    | 64    | 64    | 64    | 64    | 64    | 2   | 2   | 1   | 1   | 2   |
| VISA | VRS3b                    | Resistant                   | -       | 8   | 16  | 4  | 4  | 8  | 1   | 1   | 1  | 1  | 1  | 0.25  | 0.25  | 0.25  | 0.25  | 0.25  | 0.25  | 64    | 64    | 64    | 64    | 64    | 64    | 2   | 2   | 1   | 1   | 2   |
| VISA | VRS4                     | Resistant                   | -       | 64  | 64  | 16 | 8  | 64 | 4   | 2   | 2  | 2  | 2  | 0.25  | 0.25  | 0.5   | 0.5   | 0.5   | 0.5   | 64    | 64    | 64    | 64    | 64    | 64    | 2   | 2   | 1   | 1   | 2   |
| VISA | VRS1                     | Resistant                   | -       | 64  | 64  | 64 | 64 | 64 | 2   | 2   | 2  | 2  | 2  | 32    | 32    | 16    | 16    | 32    | 32    | 64    | 64    | 64    | 64    | 64    | 64    | 2   | 2   | 1   | 1   | 2   |
| VISA | VRS10                    | Resistant                   | -       | 64  | 64  | 64 | 64 | 64 | 2   | 2   | 4  | 2  | 2  | 0.5   | 0.5   | 0.25  | 0.5   | 0.5   | 0.5   | 64    | 64    | 64    | 64    | 64    | 64    | 2   | 2   | 1   | 1   | 2   |

**Supplementary Table 3. *S. aureus* and beta-hemolytic streptococci MIC90 summary**  
(Micromyx Isolates,  $\mu\text{g mL}^{-1}$ , n = 1)

| Organism                                       | Drug | MIC Range |   |       | Mode       | MIC50 | MIC90 | %S    | %R    |
|------------------------------------------------|------|-----------|---|-------|------------|-------|-------|-------|-------|
| <i>Staphylococcus aureus</i> (100)             | CBD  | 1         | - | 2     | 1          | 1     | 1     | NA    | NA    |
|                                                | CLI  | ≤0.015    | - | >16   | 0.12       | 0.12  | >16   | 83.0% | 17.0% |
|                                                | ERY  | 0.25      | - | >16   | >16        | >16   | >16   | 42.0% | 56.0% |
|                                                | LVX  | 0.03      | - | >16   | 0.12, 0.25 | 0.25  | >16   | 55.0% | 44.0% |
|                                                | MUP  | ≤0.25     | - | >256  | ≤0.25      | ≤0.25 | ≤0.25 | NA    | NA    |
|                                                | OXA  | 0.12      | - | >32   | >32        | 2     | >32   | 50.0% | 50.0% |
|                                                | RET  | ≤0.03     | - | 0.12  | ≤0.03      | ≤0.03 | 0.12  | NA    | NA    |
|                                                | VAN  | 0.25      | - | 4     | 0.5        | 0.5   | 1     | 98.0% | 0.0%  |
| subset of MSSA (50)                            | CBD  | 1         | - | 2     | 1          | 1     | 1     | NA    | NA    |
|                                                | CLI  | ≤0.015    | - | >16   | 0.12       | 0.12  | 0.25  | 92.0% | 8.0%  |
|                                                | ERY  | 0.25      | - | >16   | 0.25       | 0.5   | >16   | 70.0% | 28.0% |
|                                                | LVX  | 0.03      | - | >16   | 0.12       | 0.12  | 0.5   | 90.0% | 10.0% |
|                                                | MUP  | ≤0.25     | - | ≤0.25 | ≤0.25      | ≤0.25 | ≤0.25 | NA    | NA    |
|                                                | OXA  | 0.12      | - | 2     | 0.25       | 0.5   | 1     | 100%  | 0.0%  |
|                                                | RET  | ≤0.03     | - | 0.12  | ≤0.03      | ≤0.03 | 0.12  | NA    | NA    |
|                                                | VAN  | 0.25      | - | 1     | 0.5        | 0.5   | 1     | 100%  | 0.0%  |
| subset of MRSA (50)                            | CBD  | 1         | - | 2     | 1          | 1     | 1     | NA    | NA    |
|                                                | CLI  | 0.06      | - | >16   | 0.12       | 0.12  | >16   | 74.0% | 26.0% |
|                                                | ERY  | 0.25      | - | >16   | >16        | >16   | >16   | 14.0% | 84.0% |
|                                                | LVX  | 0.12      | - | >16   | 4          | 4     | >16   | 20.0% | 78.0% |
|                                                | MUP  | ≤0.25     | - | >256  | ≤0.25      | ≤0.25 | 32    | NA    | NA    |
|                                                | OXA  | 4         | - | >32   | >32        | >32   | >32   | 0.0%  | 100%  |
|                                                | RET  | ≤0.03     | - | 0.12  | ≤0.03      | ≤0.03 | 0.12  | NA    | NA    |
|                                                | VAN  | 0.25      | - | 4     | 0.5        | 0.5   | 1     | 96.0% | 0.0%  |
| Beta-hemolytic streptococci (59) <sup>1</sup>  | CBD  | 8         | - | 32    | 16         | 16    | 16    | NA    | NA    |
|                                                | CLI  | 0.03      | - | >16   | 0.03       | 0.06  | >16   | 72.9% | 27.1% |
|                                                | ERY  | ≤0.015    | - | >16   | 0.03, 0.06 | 0.06  | >16   | 57.6% | 42.4% |
|                                                | LVX  | 0.12      | - | 2     | 0.5        | 0.5   | 1     | 100%  | 0.0%  |
|                                                | MUP  | ≤0.25     | - | 2     | ≤0.25      | ≤0.25 | 1     | NA    | NA    |
|                                                | OXA  | ≤0.03     | - | 0.5   | ≤0.03      | 0.25  | 0.5   | NA    | NA    |
|                                                | RET  | ≤0.03     | - | 0.06  | ≤0.03      | ≤0.03 | ≤0.03 | NA    | NA    |
|                                                | VAN  | 0.25      | - | 1     | 0.25       | 0.25  | 0.5   | 100%  | 0.0%  |
| subset of <i>Streptococcus pyogenes</i> (29)   | CBD  | 8         | - | 32    | 16         | 16    | 16    | NA    | NA    |
|                                                | CLI  | 0.03      | - | >16   | 0.03       | 0.06  | >16   | 89.7% | 10.3% |
|                                                | ERY  | ≤0.015    | - | >16   | 0.03       | 0.06  | >16   | 86.2% | 13.8% |
|                                                | LVX  | 0.12      | - | 2     | 0.5        | 0.5   | 1     | 100%  | 0.0%  |
|                                                | MUP  | ≤0.25     | - | 0.5   | ≤0.25      | ≤0.25 | ≤0.25 | NA    | NA    |
|                                                | OXA  | ≤0.03     | - | 0.12  | ≤0.03      | ≤0.03 | 0.06  | NA    | NA    |
|                                                | RET  | ≤0.03     | - | 0.06  | ≤0.03      | ≤0.03 | ≤0.03 | NA    | NA    |
|                                                | VAN  | 0.25      | - | 1     | 0.25       | 0.25  | 0.5   | 100%  | 0.0%  |
| subset of <i>Streptococcus agalactiae</i> (30) | CBD  | 8         | - | 32    | 16         | 16    | 16    | NA    | NA    |
|                                                | CLI  | 0.03      | - | >16   | >16        | 0.06  | >16   | 56.7% | 43.3% |
|                                                | ERY  | 0.03      | - | >16   | >16        | 2     | >16   | 30.0% | 70.0% |
|                                                | LVX  | 0.5       | - | 1     | 0.5        | 0.5   | 1     | 100%  | 0.0%  |
|                                                | MUP  | ≤0.25     | - | 2     | ≤0.25      | ≤0.25 | 1     | NA    | NA    |
|                                                | OXA  | 0.25      | - | 0.5   | 0.25       | 0.25  | 0.5   | NA    | NA    |
|                                                | RET  | ≤0.03     | - | ≤0.03 | ≤0.03      | ≤0.03 | ≤0.03 | NA    | NA    |
|                                                | VAN  | 0.25      | - | 0.5   | 0.5        | 0.5   | 0.5   | 100%  | 0.0%  |

CLI, clindamycin; ERY, erythromycin, LVX, levofloxacin; MUP, mupirocin; OXA, oxacillin; RET, retapamulin; VAN, vancomycin; MSSA, methicillin-susceptible *S. aureus*; MRSA, methicillin-resistant *S. aureus*; NA, not applicable; %S, percentage of isolates that are susceptible according to established CLSI breakpoints; %R, percentage of isolates that are resistant according to established CLSI breakpoints; parentheses denote number of isolates tested in each group

**Supplementary Table 4. *S. aureus* MIC90 (Micromyx Isolate individual MIC)**

| MMX number | Pheno-type | MIC ( $\mu\text{g mL}^{-1}$ ) (n = 1) |              |     |      |     |      |     |             |      |   |             |      |     |  |
|------------|------------|---------------------------------------|--------------|-----|------|-----|------|-----|-------------|------|---|-------------|------|-----|--|
|            |            | CBD                                   |              | CLI |      | ERY |      | LVX |             | MUP  |   | OXA         |      | RET |  |
| 7793       | MSSA       | 1                                     | 0.12         | S   | 0.5  | S   | 0.25 | S   | $\leq 0.25$ | 0.25 | S | 0.06        | 1    | S   |  |
| 7794       | MSSA       | 1                                     | 0.12         | S   | 0.25 | S   | 0.5  | S   | $\leq 0.25$ | 1    | S | 0.06        | 1    | S   |  |
| 7795       | MSSA       | 1                                     | 0.12         | S   | 0.5  | S   | 0.12 | S   | $\leq 0.25$ | 1    | S | 0.06        | 1    | S   |  |
| 7797       | MSSA       | 1                                     | 0.12         | S   | >16  | R   | 0.5  | S   | $\leq 0.25$ | 1    | S | 0.12        | 1    | S   |  |
| 7798       | MSSA       | 1                                     | 0.12         | S   | 0.25 | S   | 0.12 | S   | $\leq 0.25$ | 0.5  | S | 0.06        | 0.5  | S   |  |
| 7799       | MSSA       | 1                                     | 0.12         | S   | 0.25 | S   | 0.12 | S   | $\leq 0.25$ | 1    | S | 0.06        | 0.25 | S   |  |
| 7800       | MSSA       | 1                                     | 0.12         | S   | 0.25 | S   | 0.03 | S   | $\leq 0.25$ | 0.25 | S | 0.06        | 0.5  | S   |  |
| 7801       | MSSA       | 1                                     | 0.12         | S   | >16  | R   | 0.12 | S   | $\leq 0.25$ | 0.5  | S | 0.12        | 0.5  | S   |  |
| 7802       | MSSA       | 1                                     | 0.12         | S   | >16  | R   | 16   | R   | $\leq 0.25$ | 0.5  | S | 0.06        | 0.5  | S   |  |
| 7803       | MSSA       | 1                                     | 0.12         | S   | 0.25 | S   | 0.25 | S   | $\leq 0.25$ | 1    | S | 0.12        | 1    | S   |  |
| 7804       | MSSA       | 1                                     | 0.12         | S   | 0.25 | S   | 0.25 | S   | $\leq 0.25$ | 1    | S | 0.06        | 1    | S   |  |
| 7805       | MSSA       | 1                                     | 0.12         | S   | 0.25 | S   | 0.25 | S   | $\leq 0.25$ | 0.25 | S | 0.12        | 0.5  | S   |  |
| 7806       | MSSA       | 1                                     | 0.12         | S   | 0.25 | S   | 0.12 | S   | $\leq 0.25$ | 0.5  | S | 0.06        | 0.5  | S   |  |
| 7894       | MSSA       | 1                                     | >16          | R   | >16  | R   | 4    | R   | $\leq 0.25$ | 0.5  | S | $\leq 0.03$ | 1    | S   |  |
| 7909       | MSSA       | 1                                     | 0.06         | S   | 0.25 | S   | 0.12 | S   | $\leq 0.25$ | 0.25 | S | $\leq 0.03$ | 1    | S   |  |
| 7910       | MSSA       | 1                                     | 0.06         | S   | 0.25 | S   | 0.25 | S   | $\leq 0.25$ | 0.25 | S | $\leq 0.03$ | 1    | S   |  |
| 7911       | MSSA       | 1                                     | 0.06         | S   | 0.25 | S   | 0.12 | S   | $\leq 0.25$ | 0.12 | S | $\leq 0.03$ | 0.5  | S   |  |
| 7912       | MSSA       | 1                                     | 0.25         | S   | 0.5  | S   | 0.25 | S   | $\leq 0.25$ | 0.25 | S | $\leq 0.03$ | 0.5  | S   |  |
| 7913       | MSSA       | 1                                     | 0.06         | S   | 0.25 | S   | 0.25 | S   | $\leq 0.25$ | 0.5  | S | $\leq 0.03$ | 1    | S   |  |
| 7914       | MSSA       | 2                                     | 0.12         | S   | 16   | R   | 8    | R   | $\leq 0.25$ | 1    | S | $\leq 0.03$ | 1    | S   |  |
| 7915       | MSSA       | 1                                     | 0.06         | S   | 0.5  | S   | 0.25 | S   | $\leq 0.25$ | 0.25 | S | $\leq 0.03$ | 0.5  | S   |  |
| 7916       | MSSA       | 1                                     | 0.06         | S   | 0.25 | S   | 0.12 | S   | $\leq 0.25$ | 0.25 | S | $\leq 0.03$ | 0.5  | S   |  |
| 7917       | MSSA       | 1                                     | 0.06         | S   | 0.25 | S   | 0.12 | S   | $\leq 0.25$ | 0.5  | S | $\leq 0.03$ | 0.5  | S   |  |
| 7918       | MSSA       | 1                                     | 0.12         | S   | 0.5  | S   | 0.25 | S   | $\leq 0.25$ | 0.5  | S | $\leq 0.03$ | 1    | S   |  |
| 7919       | MSSA       | 1                                     | >16          | R   | >16  | R   | >16  | R   | $\leq 0.25$ | 0.25 | S | $\leq 0.03$ | 1    | S   |  |
| 7920       | MSSA       | 1                                     | 0.06         | S   | 0.5  | S   | 0.06 | S   | $\leq 0.25$ | 0.25 | S | $\leq 0.03$ | 0.5  | S   |  |
| 7921       | MSSA       | 1                                     | 0.06         | S   | 0.25 | S   | 0.12 | S   | $\leq 0.25$ | 0.25 | S | $\leq 0.03$ | 0.5  | S   |  |
| 7922       | MSSA       | 1                                     | 0.06         | S   | 0.5  | S   | 0.25 | S   | $\leq 0.25$ | 0.25 | S | $\leq 0.03$ | 0.5  | S   |  |
| 7923       | MSSA       | 1                                     | 0.12         | S   | 0.5  | S   | 0.25 | S   | $\leq 0.25$ | 0.12 | S | $\leq 0.03$ | 1    | S   |  |
| 8834       | MSSA       | 1                                     | 0.06         | S   | >16  | R   | 16   | R   | $\leq 0.25$ | 1    | S | $\leq 0.03$ | 0.5  | S   |  |
| 8836       | MSSA       | 1                                     | 0.12         | S   | >16  | R   | 0.12 | S   | $\leq 0.25$ | 0.5  | S | $\leq 0.03$ | 0.5  | S   |  |
| 8838       | MSSA       | 1                                     | 0.12         | S   | 0.5  | S   | 0.12 | S   | $\leq 0.25$ | 0.5  | S | $\leq 0.03$ | 0.5  | S   |  |
| 8839       | MSSA       | 1                                     | 0.12         | S   | 0.5  | S   | 0.12 | S   | $\leq 0.25$ | 0.25 | S | $\leq 0.03$ | 0.5  | S   |  |
| 8840       | MSSA       | 1                                     | 0.06         | S   | 0.25 | S   | 0.12 | S   | $\leq 0.25$ | 0.5  | S | $\leq 0.03$ | 0.5  | S   |  |
| 9093       | MSSA       | 1                                     | >16          | R   | >16  | R   | 0.06 | S   | $\leq 0.25$ | 1    | S | $\leq 0.03$ | 0.5  | S   |  |
| 9094       | MSSA       | 1                                     | 0.06         | S   | 0.25 | S   | 0.12 | S   | $\leq 0.25$ | 0.5  | S | $\leq 0.03$ | 0.5  | S   |  |
| 9095       | MSSA       | 1                                     | 0.12         | S   | >16  | R   | 0.12 | S   | $\leq 0.25$ | 0.5  | S | $\leq 0.03$ | 0.5  | S   |  |
| 9116       | MSSA       | 1                                     | $\leq 0.015$ | S   | 0.25 | S   | 0.25 | S   | $\leq 0.25$ | 0.12 | S | $\leq 0.03$ | 0.5  | S   |  |
| 9179       | MSSA       | 1                                     | 0.06         | S   | 0.5  | S   | 0.12 | S   | $\leq 0.25$ | 0.25 | S | $\leq 0.03$ | 0.5  | S   |  |
| 9180       | MSSA       | 1                                     | 0.12         | S   | 8    | R   | 0.12 | S   | $\leq 0.25$ | 1    | S | $\leq 0.03$ | 0.5  | S   |  |
| 9181       | MSSA       | 1                                     | 0.06         | S   | 0.25 | S   | 0.12 | S   | $\leq 0.25$ | 0.5  | S | $\leq 0.03$ | 1    | S   |  |
| 9182       | MSSA       | 1                                     | 0.12         | S   | 8    | R   | 0.12 | S   | $\leq 0.25$ | 1    | S | $\leq 0.03$ | 0.5  | S   |  |
| 9183       | MSSA       | 1                                     | 0.25         | S   | 0.5  | S   | 0.12 | S   | $\leq 0.25$ | 0.5  | S | $\leq 0.03$ | 0.5  | S   |  |
| 9184       | MSSA       | 1                                     | 0.12         | S   | 0.5  | S   | 0.25 | S   | $\leq 0.25$ | 0.25 | S | $\leq 0.03$ | 1    | S   |  |
| 9185       | MSSA       | 1                                     | 0.12         | S   | 0.5  | S   | 0.25 | S   | $\leq 0.25$ | 0.25 | S | $\leq 0.03$ | 0.5  | S   |  |
| 9233       | MSSA       | 1                                     | 0.12         | S   | 0.25 | S   | 0.12 | S   | $\leq 0.25$ | 0.25 | S | $\leq 0.03$ | 0.5  | S   |  |
| 10714      | MSSA       | 1                                     | 0.25         | S   | 1    | I   | 0.25 | S   | $\leq 0.25$ | 2    | S | 0.12        | 1    | S   |  |
| 10716      | MSSA       | 1                                     | 0.25         | S   | 0.5  | S   | 0.25 | S   | $\leq 0.25$ | 1    | S | 0.12        | 1    | S   |  |
| 10718      | MSSA       | 1                                     | 0.25         | S   | >16  | R   | 0.25 | S   | $\leq 0.25$ | 1    | S | 0.12        | 1    | S   |  |
| 10719      | MSSA       | 1                                     | >16          | R   | >16  | R   | 0.25 | S   | $\leq 0.25$ | 0.5  | S | 0.06        | 1    | S   |  |

| MMX number | Pheno-type | MIC ( $\mu\text{g mL}^{-1}$ ) |      |   |      |   |      |   |             |     |   |             |      |   |
|------------|------------|-------------------------------|------|---|------|---|------|---|-------------|-----|---|-------------|------|---|
|            |            | CBD                           | CLI  |   | ERY  |   | LVX  |   | MUP         | OXA |   | RET         | VAN  |   |
| 7774       | MRSA       | 1                             | 0.12 | S | >16  | R | >16  | R | $\leq 0.25$ | >32 | R | 0.06        | 0.5  | S |
| 7775       | MRSA       | 1                             | 0.12 | S | >16  | R | 16   | R | $\leq 0.25$ | >32 | R | 0.12        | 0.5  | S |
| 7776       | MRSA       | 1                             | >16  | R | >16  | R | 4    | R | $\leq 0.25$ | >32 | R | $\leq 0.03$ | 0.5  | S |
| 7777       | MRSA       | 1                             | >16  | R | >16  | R | >16  | R | $\leq 0.25$ | >32 | R | 0.06        | 1    | S |
| 7778       | MRSA       | 1                             | 0.25 | S | >16  | R | 0.12 | S | 16          | >32 | R | 0.06        | 0.5  | S |
| 7779       | MRSA       | 1                             | 0.12 | S | >16  | R | 4    | R | >256        | >32 | R | 0.06        | 0.5  | S |
| 7780       | MRSA       | 2                             | 0.12 | S | 0.5  | S | 16   | R | $\leq 0.25$ | >32 | R | 0.06        | 1    | S |
| 7781       | MRSA       | 1                             | 0.12 | S | 0.25 | S | 4    | R | $\leq 0.25$ | >32 | R | 0.06        | 0.5  | S |
| 7782       | MRSA       | 1                             | 0.12 | S | >16  | R | 4    | R | >256        | >32 | R | 0.06        | 0.5  | S |
| 7783       | MRSA       | 1                             | 0.12 | S | 16   | R | 4    | R | $\leq 0.25$ | 16  | R | 0.12        | 0.5  | S |
| 7784       | MRSA       | 1                             | >16  | R | >16  | R | >16  | R | $\leq 0.25$ | >32 | R | 0.12        | 0.5  | S |
| 7785       | MRSA       | 1                             | 0.12 | S | >16  | R | 8    | R | $\leq 0.25$ | >32 | R | 0.06        | 0.5  | S |
| 7786       | MRSA       | 1                             | >16  | R | >16  | R | 8    | R | $\leq 0.25$ | >32 | R | 0.12        | 0.5  | S |
| 7787       | MRSA       | 1                             | 0.12 | S | >16  | R | 4    | R | $\leq 0.25$ | >32 | R | 0.06        | 0.5  | S |
| 7788       | MRSA       | 1                             | 0.25 | S | >16  | R | 16   | R | $\leq 0.25$ | >32 | R | 0.06        | 1    | S |
| 7792       | MRSA       | 1                             | 0.12 | S | 1    | I | 4    | R | $\leq 0.25$ | 4   | R | 0.06        | 1    | S |
| 7796       | MRSA       | 1                             | 0.12 | S | 0.5  | S | 0.25 | S | $\leq 0.25$ | 4   | R | 0.12        | 4    | I |
| 7892       | MRSA       | 1                             | >16  | R | >16  | R | >16  | R | 4           | >32 | R | $\leq 0.03$ | 0.5  | S |
| 7893       | MRSA       | 1                             | 0.06 | S | >16  | R | 8    | R | $\leq 0.25$ | >32 | R | $\leq 0.03$ | 0.5  | S |
| 7895       | MRSA       | 1                             | 0.12 | S | >16  | R | 4    | R | $\leq 0.25$ | >32 | R | $\leq 0.03$ | 0.5  | S |
| 7896       | MRSA       | 1                             | 0.12 | S | >16  | R | 4    | R | $\leq 0.25$ | >32 | R | $\leq 0.03$ | 0.5  | S |
| 7897       | MRSA       | 1                             | >16  | R | >16  | R | >16  | R | $\leq 0.25$ | >32 | R | $\leq 0.03$ | 1    | S |
| 7898       | MRSA       | 2                             | 0.12 | S | >16  | R | 0.25 | S | $\leq 0.25$ | >32 | R | $\leq 0.03$ | 1    | S |
| 7899       | MRSA       | 1                             | 0.06 | S | >16  | R | 0.12 | S | $\leq 0.25$ | >32 | R | $\leq 0.03$ | 0.25 | S |
| 7900       | MRSA       | 1                             | 0.06 | S | 0.25 | S | 0.12 | S | $\leq 0.25$ | >32 | R | $\leq 0.03$ | 0.5  | S |
| 7901       | MRSA       | 1                             | 0.06 | S | >16  | R | 0.25 | S | $\leq 0.25$ | >32 | R | $\leq 0.03$ | 0.5  | S |
| 7902       | MRSA       | 1                             | >16  | R | >16  | R | >16  | R | $\leq 0.25$ | >32 | R | $\leq 0.03$ | 1    | S |
| 7903       | MRSA       | 1                             | >16  | R | >16  | R | 16   | R | $\leq 0.25$ | >32 | R | $\leq 0.03$ | 1    | S |
| 7904       | MRSA       | 1                             | 0.12 | S | >16  | R | 4    | R | $\leq 0.25$ | >32 | R | $\leq 0.03$ | 0.5  | S |
| 7905       | MRSA       | 1                             | 0.06 | S | >16  | R | 0.25 | S | $\leq 0.25$ | >32 | R | $\leq 0.03$ | 1    | S |
| 7906       | MRSA       | 1                             | >16  | R | >16  | R | >16  | R | 32          | >32 | R | 0.06        | 2    | S |
| 8841       | MRSA       | 1                             | 0.06 | S | >16  | R | >16  | R | $\leq 0.25$ | >32 | R | $\leq 0.03$ | 0.5  | S |
| 8842       | MRSA       | 1                             | >16  | R | >16  | R | 16   | R | $\leq 0.25$ | 32  | R | $\leq 0.03$ | 0.5  | S |
| 8844       | MRSA       | 1                             | 0.06 | S | 0.25 | S | 0.25 | S | $\leq 0.25$ | >32 | R | $\leq 0.03$ | 0.5  | S |
| 8845       | MRSA       | 1                             | >16  | R | >16  | R | >16  | R | >256        | >32 | R | $\leq 0.03$ | 1    | S |
| 9096       | MRSA       | 1                             | 0.06 | S | >16  | R | 2    | I | $\leq 0.25$ | >32 | R | $\leq 0.03$ | 1    | S |
| 9117       | MRSA       | 1                             | >16  | R | >16  | R | >16  | R | $\leq 0.25$ | >32 | R | $\leq 0.03$ | 1    | S |
| 9201       | MRSA       | 1                             | 0.06 | S | >16  | R | 4    | R | $\leq 0.25$ | >32 | R | $\leq 0.03$ | 1    | S |
| 9202       | MRSA       | 1                             | >16  | R | >16  | R | >16  | R | >256        | >32 | R | 0.12        | 1    | S |
| 9203       | MRSA       | 1                             | 0.06 | S | >16  | R | 4    | R | $\leq 0.25$ | >32 | R | $\leq 0.03$ | 0.5  | S |
| 9204       | MRSA       | 1                             | 0.12 | S | >16  | R | 4    | R | $\leq 0.25$ | >32 | R | $\leq 0.03$ | 0.5  | S |
| 9210       | MRSA       | 1                             | 0.12 | S | >16  | R | 4    | R | $\leq 0.25$ | 32  | R | $\leq 0.03$ | 0.5  | S |
| 9213       | MRSA       | 1                             | 0.06 | S | >16  | R | 16   | R | $\leq 0.25$ | 32  | R | $\leq 0.03$ | 0.5  | S |
| 9216       | MRSA       | 1                             | 0.06 | S | >16  | R | 0.25 | S | $\leq 0.25$ | 32  | R | $\leq 0.03$ | 0.5  | S |
| 10715      | MRSA       | 1                             | 0.12 | S | >16  | R | 8    | R | $\leq 0.25$ | >32 | R | 0.06        | 1    | S |
| 10717      | MRSA       | 1                             | 0.12 | S | >16  | R | 8    | R | $\leq 0.25$ | >32 | R | 0.12        | 1    | S |
| 10720      | MRSA       | 1                             | 0.12 | S | >16  | R | 16   | R | $\leq 0.25$ | >32 | R | 0.06        | 4    | I |
| 10721      | MRSA       | 1                             | 0.12 | S | 0.5  | S | 8    | R | >256        | >32 | R | $\leq 0.03$ | 1    | S |
| 10722      | MRSA       | 1                             | 0.12 | S | >16  | R | 16   | R | $\leq 0.25$ | >32 | R | 0.06        | 1    | S |
| 10723      | MRSA       | 1                             | 0.12 | S | 0.5  | S | 0.25 | S | $\leq 0.25$ | 16  | R | 0.06        | 1    | S |
| 10723      | MRSA       | 1                             | 0.12 | S | 0.5  | S | 0.25 | S | $\leq 0.25$ | 16  | R | 0.06        | 1    | S |

MMX, Micromyx repository number; MRSA, methicillin-resistant *S. aureus*; S, susceptible by CLSI breakpoints; R, resistant by CLSI breakpoints; CLI, clindamycin; ERY, erythromycin; LVX, levofloxacin; MUP, mupirocin; OXA, oxacillin; RET, retapamulin; VAN, vancomycin

**Supplementary Table 5. -hemolytic streptococci MIC90 (Micromyx isolate MIC)**

| MMX number | <i>Streptococcus pyogenes</i> MIC ( $\mu\text{g mL}^{-1}$ ) (n = 1) |      |   |              |   |      |     |             |             |             |      |     |     |     |
|------------|---------------------------------------------------------------------|------|---|--------------|---|------|-----|-------------|-------------|-------------|------|-----|-----|-----|
|            | CBD                                                                 |      |   | CLI          |   |      | ERY |             | LVX         |             | MUP  | OXA | RET | VAN |
| 8781       | 8                                                                   | 0.06 | S | 0.03         | S | 0.5  | S   | $\leq 0.25$ | $\leq 0.03$ | $\leq 0.03$ | 0.25 | S   |     |     |
| 8790       | 16                                                                  | 0.03 | S | 0.03         | S | 0.5  | S   | $\leq 0.25$ | $\leq 0.03$ | $\leq 0.03$ | 0.25 | S   |     |     |
| 8817       | 16                                                                  | 0.03 | S | 0.03         | S | 0.25 | S   | $\leq 0.25$ | $\leq 0.03$ | $\leq 0.03$ | 0.25 | S   |     |     |
| 8818       | 8                                                                   | 0.03 | S | $\leq 0.015$ | S | 0.25 | S   | $\leq 0.25$ | $\leq 0.03$ | $\leq 0.03$ | 0.25 | S   |     |     |
| 8819       | 8                                                                   | 0.03 | S | 0.03         | S | 0.25 | S   | $\leq 0.25$ | $\leq 0.03$ | $\leq 0.03$ | 0.25 | S   |     |     |
| 8820       | 16                                                                  | 0.03 | S | 0.06         | S | 0.5  | S   | $\leq 0.25$ | $\leq 0.03$ | $\leq 0.03$ | 0.25 | S   |     |     |
| 8821       | 8                                                                   | 0.03 | S | 0.03         | S | 0.5  | S   | $\leq 0.25$ | $\leq 0.03$ | $\leq 0.03$ | 0.25 | S   |     |     |
| 8822       | 16                                                                  | 0.03 | S | 0.06         | S | 0.5  | S   | $\leq 0.25$ | 0.06        | $\leq 0.03$ | 0.5  | S   |     |     |
| 8823       | 8                                                                   | 0.06 | S | >16          | R | 0.25 | S   | $\leq 0.25$ | 0.06        | $\leq 0.03$ | 0.25 | S   |     |     |
| 8824       | 16                                                                  | 0.03 | S | 0.03         | S | 0.25 | S   | $\leq 0.25$ | 0.06        | $\leq 0.03$ | 0.25 | S   |     |     |
| 8825       | 16                                                                  | 0.03 | S | 0.03         | S | 1    | S   | $\leq 0.25$ | $\leq 0.03$ | $\leq 0.03$ | 0.25 | S   |     |     |
| 8827       | 16                                                                  | 0.03 | S | 0.03         | S | 0.5  | S   | $\leq 0.25$ | $\leq 0.03$ | $\leq 0.03$ | 0.25 | S   |     |     |
| 8828       | 16                                                                  | >16  | R | >16          | R | 0.5  | S   | $\leq 0.25$ | $\leq 0.03$ | $\leq 0.03$ | 0.25 | S   |     |     |
| 8829       | 8                                                                   | >16  | R | >16          | R | 0.5  | S   | 0.5         | $\leq 0.03$ | $\leq 0.03$ | 0.25 | S   |     |     |
| 8902       | 8                                                                   | 0.06 | S | 0.06         | S | 0.5  | S   | $\leq 0.25$ | $\leq 0.03$ | $\leq 0.03$ | 0.25 | S   |     |     |
| 9170       | 16                                                                  | 0.06 | S | 0.03         | S | 0.5  | S   | $\leq 0.25$ | $\leq 0.03$ | $\leq 0.03$ | 0.25 | S   |     |     |
| 9171       | 16                                                                  | 0.06 | S | 0.06         | S | 0.5  | S   | $\leq 0.25$ | $\leq 0.03$ | $\leq 0.03$ | 0.25 | S   |     |     |
| 9172       | 16                                                                  | 0.03 | S | 0.03         | S | 1    | S   | $\leq 0.25$ | $\leq 0.03$ | $\leq 0.03$ | 0.25 | S   |     |     |
| 9173       | 16                                                                  | 0.06 | S | 0.06         | S | 0.25 | S   | $\leq 0.25$ | $\leq 0.03$ | $\leq 0.03$ | 0.25 | S   |     |     |
| 9174       | 8                                                                   | 0.06 | S | 0.06         | S | 0.5  | S   | $\leq 0.25$ | $\leq 0.03$ | $\leq 0.03$ | 0.25 | S   |     |     |
| 9175       | 16                                                                  | 0.06 | S | 0.06         | S | 0.5  | S   | $\leq 0.25$ | $\leq 0.03$ | $\leq 0.03$ | 0.25 | S   |     |     |
| 9176       | 32                                                                  | 0.12 | S | 0.12         | S | 0.12 | S   | $\leq 0.25$ | 0.12        | 0.06        | 1    | S   |     |     |
| 9177       | 16                                                                  | 0.06 | S | 0.06         | S | 2    | S   | $\leq 0.25$ | $\leq 0.03$ | $\leq 0.03$ | 0.25 | S   |     |     |
| 9178       | 16                                                                  | 0.06 | S | 0.06         | S | 2    | S   | $\leq 0.25$ | 0.06        | $\leq 0.03$ | 0.25 | S   |     |     |
| 10604      | 16                                                                  | 0.06 | S | 0.06         | S | 0.5  | S   | $\leq 0.25$ | $\leq 0.03$ | $\leq 0.03$ | 0.25 | S   |     |     |
| 10605      | 16                                                                  | 0.06 | S | 0.06         | S | 1    | S   | $\leq 0.25$ | 0.06        | $\leq 0.03$ | 0.5  | S   |     |     |
| 10606      | 16                                                                  | 0.03 | S | 0.03         | S | 0.5  | S   | $\leq 0.25$ | $\leq 0.03$ | $\leq 0.03$ | 0.25 | S   |     |     |
| 10607      | 16                                                                  | >16  | R | >16          | R | 0.5  | S   | $\leq 0.25$ | $\leq 0.03$ | $\leq 0.03$ | 0.25 | S   |     |     |
| 10608      | 8                                                                   | 0.03 | S | 0.03         | S | 0.5  | S   | $\leq 0.25$ | $\leq 0.03$ | $\leq 0.03$ | 0.25 | S   |     |     |
| MMX number | <i>Streptococcus agalactiae</i> MIC ( $\mu\text{g mL}^{-1}$ )       |      |   |              |   |      |     |             |             |             |      |     |     |     |
|            | CBD                                                                 |      |   | CLI          |   |      | ERY |             | LVX         |             | MUP  | OXA | RET | VAN |
| 8696       | 16                                                                  | 0.06 | S | 0.06         | S | 0.5  | S   | $\leq 0.25$ | 0.25        | $\leq 0.03$ | 0.5  | S   |     |     |
| 8697       | 16                                                                  | 0.06 | S | 4            | R | 1    | S   | $\leq 0.25$ | 0.5         | $\leq 0.03$ | 0.5  | S   |     |     |
| 8698       | 16                                                                  | 0.03 | S | 0.03         | S | 0.5  | S   | $\leq 0.25$ | 0.25        | $\leq 0.03$ | 0.25 | S   |     |     |
| 8699       | 16                                                                  | 0.03 | S | 2            | R | 0.5  | S   | $\leq 0.25$ | 0.5         | $\leq 0.03$ | 0.25 | S   |     |     |
| 8700       | 16                                                                  | 0.03 | S | 0.03         | S | 0.5  | S   | $\leq 0.25$ | 0.25        | $\leq 0.03$ | 0.25 | S   |     |     |
| 8701       | 16                                                                  | 0.03 | S | 2            | R | 0.5  | S   | $\leq 0.25$ | 0.5         | $\leq 0.03$ | 0.25 | S   |     |     |
| 8702       | 16                                                                  | 0.06 | S | 2            | R | 0.5  | S   | $\leq 0.25$ | 0.5         | $\leq 0.03$ | 0.5  | S   |     |     |
| 8703       | 16                                                                  | 0.03 | S | 0.06         | S | 0.5  | S   | $\leq 0.25$ | 0.5         | $\leq 0.03$ | 0.5  | S   |     |     |
| 8704       | 16                                                                  | 0.03 | S | 0.03         | S | 0.5  | S   | $\leq 0.25$ | 0.25        | $\leq 0.03$ | 0.5  | S   |     |     |
| 8705       | 16                                                                  | 0.03 | S | 4            | R | 0.5  | S   | $\leq 0.25$ | 0.25        | $\leq 0.03$ | 0.5  | S   |     |     |
| 8786       | 16                                                                  | >16  | R | >16          | R | 0.5  | S   | 1           | 0.5         | $\leq 0.03$ | 0.25 | S   |     |     |
| 8787       | 16                                                                  | 0.03 | S | 1            | R | 0.5  | S   | 1           | 0.25        | $\leq 0.03$ | 0.25 | S   |     |     |
| 8788       | 8                                                                   | >16  | R | >16          | R | 1    | S   | 0.5         | 0.5         | $\leq 0.03$ | 0.25 | S   |     |     |
| 8789       | 16                                                                  | >16  | R | >16          | R | 0.5  | S   | 0.5         | 0.25        | $\leq 0.03$ | 0.5  | S   |     |     |
| 8791       | 16                                                                  | >16  | R | >16          | R | 0.5  | S   | 1           | 0.25        | $\leq 0.03$ | 0.5  | S   |     |     |
| 8792       | 16                                                                  | >16  | R | 1            | R | 1    | S   | 2           | 0.5         | $\leq 0.03$ | 0.5  | S   |     |     |
| 8793       | 16                                                                  | 0.12 | S | 1            | R | 0.5  | S   | 1           | 0.25        | $\leq 0.03$ | 0.25 | S   |     |     |
| 8794       | 16                                                                  | 0.03 | S | 0.03         | S | 0.5  | S   | 1           | 0.25        | $\leq 0.03$ | 0.5  | S   |     |     |
| 8795       | 16                                                                  | >16  | R | >16          | R | 0.5  | S   | 0.5         | 0.25        | $\leq 0.03$ | 0.5  | S   |     |     |
| 8796       | 16                                                                  | 0.06 | S | 0.06         | S | 1    | S   | 1           | 0.25        | $\leq 0.03$ | 0.5  | S   |     |     |
| 8892       | 16                                                                  | >16  | R | >16          | R | 0.5  | S   | $\leq 0.25$ | 0.25        | $\leq 0.03$ | 0.25 | S   |     |     |
| 10609      | 16                                                                  | >16  | R | >16          | R | 0.5  | S   | $\leq 0.25$ | 0.25        | $\leq 0.03$ | 0.25 | S   |     |     |
| 10610      | 32                                                                  | >16  | R | 8            | R | 1    | S   | 1           | 0.5         | $\leq 0.03$ | 0.5  | S   |     |     |
| 10611      | 16                                                                  | 0.06 | S | 0.06         | S | 0.5  | S   | $\leq 0.25$ | 0.25        | $\leq 0.03$ | 0.5  | S   |     |     |
| 10612      | 16                                                                  | >16  | R | >16          | R | 0.5  | S   | $\leq 0.25$ | 0.25        | $\leq 0.03$ | 0.5  | S   |     |     |
| 10613      | 16                                                                  | 0.06 | S | 0.06         | S | 0.5  | S   | $\leq 0.25$ | 0.25        | $\leq 0.03$ | 0.5  | S   |     |     |
| 10729      | 16                                                                  | 0.03 | S | 2            | R | 0.5  | S   | $\leq 0.25$ | 0.25        | $\leq 0.03$ | 0.25 | S   |     |     |
| 10730      | 16                                                                  | >16  | R | >16          | R | 0.5  | S   | $\leq 0.25$ | 0.25        | $\leq 0.03$ | 0.5  | S   |     |     |
| 10731      | 16                                                                  | >16  | R | >16          | R | 0.5  | S   | $\leq 0.25$ | 0.25        | $\leq 0.03$ | 0.5  | S   |     |     |
| 10732      | 16                                                                  | >16  | R | >16          | R | 0.5  | S   | $\leq 0.25$ | 0.25        | $\leq 0.03$ | 0.5  | S   |     |     |

MMX, Micromyx repository number; S, susceptible by CLSI breakpoints; R, resistant by CLSI breakpoints; CLI, clindamycin; ERY, erythromycin; LVX, levofloxacin; MUP, mupirocin; OXA, oxacillin; RET, retapamulin; VAN, vancomycin

**Supplementary Table 6:** Minimum inhibitory concentrations (MICs) of CBD ( $\mu\text{g mL}^{-1}$ ) against other classes of microorganisms (n = 4).

| <b>Yeasts</b>                                                      | <b>Strain</b> | <b>Flucon-azole</b> | <b>5-fluoro-cytosine</b> |                  |                    | <b>CBD</b>      |
|--------------------------------------------------------------------|---------------|---------------------|--------------------------|------------------|--------------------|-----------------|
| <i>Candida albicans</i> <sup>1</sup>                               | ATCC 90028    | 1                   | 0.5-1                    |                  |                    | >128            |
| <i>Cryptococcus neoformans</i> var. <i>grubii</i> <sup>1</sup> H99 | ATCC 208821   | 8-16                | 0.5-1                    |                  |                    | 128             |
| <b>Mycobacteria</b>                                                | <b>Strain</b> | <b>Mupirocin</b>    | <b>Isoniazid</b>         | <b>Linezolid</b> | <b>Rifam-picin</b> | <b>CBD</b>      |
| <i>Mycobacterium smegmatis</i> Mc(2)155 <sup>1</sup>               | ATCC 700084   | 256                 | 8                        | 0.5              | 32                 | 16              |
| <i>Mycobacterium tuberculosis</i> H37Rv <sup>1</sup>               |               |                     | 1                        |                  | 2                  | >64 (70% inhib) |

<sup>1</sup>MIC assays at UQ

**Supplementary Table 7.** Minimum inhibitory concentrations (MICs) of CBD ( $\mu\text{g mL}^{-1}$ ) against Gram-negative bacteria.

| Species                                           | Strain                    | Colistin    | Trimethoprim  | Mupirocin      | Clindamycin  | CBD |
|---------------------------------------------------|---------------------------|-------------|---------------|----------------|--------------|-----|
| <i>Escherichia coli</i> <sup>1</sup>              | ATCC 25922                | 0.06–0.125  | 0.5–2         | >64            | >64          | >64 |
| <i>Klebsiella pneumoniae</i> <sup>1</sup>         | ATCC 700603               | 0.125–1     | 8–16          | >64            | >64          | >64 |
| <i>Pseudomonas aeruginosa</i> <sup>1</sup>        | ATCC 27853                | 0.25–1      | >64           | >64            | >64          | >64 |
| <i>Neisseria gonorrhoeae</i> 24h/48h <sup>1</sup> | ATCC 19424                | 32/32       |               | ≤0.03/0.03     | 1/1          | 2/2 |
| Species                                           | Strain                    | Vanco-mycin | Levo-floxacin | Mero-penem     | Genta-micin  | CBD |
| <i>Campylobacter jejuni</i> <sup>2</sup>          | MMX 5491                  | >32         | 0.25          | ≤0.03          | 1            | >64 |
| <i>Escherichia coli</i> <sup>2</sup>              | ATCC 25922                | >32         | 0.015         | ≤0.03          | 0.25         | >64 |
| <i>Escherichia coli</i> <sup>2</sup>              | MMX 9022 ESBL             | >32         | 16            | 0.06           | 0.5          | >64 |
| <i>Enterobacter cloacae</i> <sup>2</sup>          | MMX 6089                  | >32         | 0.015         | ≤0.03          | 0.12         | >64 |
| <i>Enterobacter cloacae</i> <sup>2</sup>          | MMX 6308 MDR              | >32         | 32            | 16             | >32          | >64 |
| <i>Klebsiella pneumoniae</i> <sup>2</sup>         | ATCC 13883                | >32         | 0.12          | ≤0.03          | 0.25         | >64 |
| <i>Klebsiella pneumoniae</i> <sup>2</sup>         | MMX 4623 KPC-2            | >32         | 1             | >32            | >32          | >64 |
| <i>Serratia marcescens</i> <sup>2</sup>           | MMX 6462                  | >32         | 0.06          | 0.12           | 1            | >64 |
| <i>Serratia marcescens</i> <sup>2</sup>           | MMX 4544 MDR              | >32         | 0.06          | 0.06           | >32          | >64 |
| <i>Stenotrophomonas maltophilia</i> <sup>2</sup>  | MMX 4746                  | >32         | 0.5           | 8              | 0.5          | >64 |
| <i>Stenotrophomonas maltophilia</i> <sup>2</sup>  | MMX 4708 MDR              | >32         | 1             | >32            | >32          | >64 |
| <i>Burkholderia cepacia</i> <sup>2</sup>          | MMX 547 GM <sup>R</sup>   | >32         | 2             | 2              | >32          | >64 |
| <i>Proteus mirabilis</i> <sup>2</sup>             | MMX 6442                  | >32         | 0.015         | ≤0.03          | 0.25         | >64 |
| <i>Proteus mirabilis</i> <sup>2</sup>             | MMX 4524 MDR              | >32         | 8             | 0.06           | 8            | >64 |
| <i>Salmonella typhimurium</i> <sup>2</sup>        | ATCC 35987                | >32         | 0.03          | ≤0.03          | 0.25         | >64 |
| <i>Salmonella</i> Group C <sup>2</sup>            | MMX 5238                  | >32         | 0.03          | ≤0.03          | 0.25         | >64 |
| <i>Shigella dysenteriae</i> <sup>2</sup>          | ATCC 29026                | >32         | 0.03          | ≤0.03          | 0.5          | >64 |
| <i>Shigella sonnei</i> <sup>2</sup>               | ATCC 25931                | >32         | 0.015         | ≤0.03          | 0.5          | >64 |
| <i>Morganella morganii</i> <sup>2</sup>           | MMX 6234                  | >32         | 0.03          | 0.06           | 0.5          | >64 |
| <i>Morganella morganii</i> <sup>2</sup>           | MMX 6437 MDR              | >32         | 32            | 0.06           | 4            | >64 |
| <i>Providencia stuartii</i> <sup>2</sup>          | MMX 6630                  | >32         | 0.06          | ≤0.03          | 0.25         | >64 |
| <i>Providencia stuartii</i> <sup>2</sup>          | MMX 6488 MDR              | >32         | 4             | ≤0.03          | 1            | >64 |
| <i>Pseudomonas aeruginosa</i> <sup>2</sup>        | ATCC 27853                | >32         | 1             | 0.5            | 1            | >64 |
| <i>Haemophilus influenzae</i> <sup>2</sup>        | ATCC 49247                | >32         | 0.03          | 1              | 2            | >64 |
| <i>Haemophilus influenzae</i> <sup>2</sup>        | MMX 7988 BL+ve            | >32         | 0.015         | ≤0.03          | 2            | >64 |
| <i>Moraxella catarrhalis</i> <sup>2</sup>         | MMX 3782 BL+ve            | >32         | 0.03          | ≤0.03          | 0.12         | 1   |
| <i>Acinetobacter baumannii</i> <sup>2</sup>       | ATCC 19606                | >32         | 0.25          | 2              | 16           | >64 |
| <i>Acinetobacter baumannii</i> <sup>2</sup>       | MMX 6334 MDR              | >32         | 8             | >32            | >32          | >64 |
| <i>Citrobacter freundii</i> <sup>2</sup>          | MMX 6077                  | >32         | 0.03          | ≤0.03          | 0.5          | >64 |
| <i>Citrobacter freundii</i> <sup>2</sup>          | MMX 6602 MDR              | >32         | 0.06          | 0.06           | 0.5          | >64 |
| <i>Neisseria gonorrhoeae</i> <sup>2</sup>         | ATCC 49226                | 8           | 0.004         | ≤0.03          | 8            | 2   |
| <i>Neisseria gonorrhoeae</i> <sup>2</sup>         | MMX 6746 CIP <sup>R</sup> | 32          | 4             | ≤0.03          | 16           | 2   |
| <i>Neisseria gonorrhoeae</i> <sup>2</sup>         | MMX 6757 CTXNS            | 32          | 0.015         | ≤0.03          | 8            | 2   |
| <i>Neisseria meningitidis</i> <sup>2</sup>        | ATCC 13090                | >32         | 0.008         | ≤0.03          | 32           | 1   |
| <i>Legionella pneumophila</i> <sup>2</sup>        | MMX 7515                  | 0.12        | 0.25          | 0.5            | 2            | 1   |
| Gram-Negative: Anaerobic Conditions               |                           |             |               |                |              |     |
| Species                                           | Strain                    |             |               | Metro-nidazole | Clinda-mycin | CBD |
| <i>Bacteroides fragilis</i> <sup>2</sup>          | ATCC 25285                |             |               | 1              | 0.5          | 16  |
| <i>Bacteroides ovatus</i> <sup>2</sup>            | MMX 3506                  |             |               | 4              | 2            | >64 |
| <i>Prevotella bivia</i> <sup>2</sup>              | MMX 3447                  |             |               | 4              | >32          | 8   |
| <i>Veillonella parvula</i> <sup>2</sup>           | MMX 1272                  |             |               | 2              | 0.06         | >64 |
| <i>Fusobacterium nucleatum</i> <sup>2</sup>       | MMX 9914                  |             |               | 0.06           | ≤0.03        | >64 |

<sup>1</sup>MIC assays at UQ (n = 4), <sup>2</sup>MIC assays at Micromyx (n = 1)

ESBL, extended-spectrum beta-lactamase producing; KPC, *Klebsiella pneumoniae* carbapenemase; MDR, multi-drug resistant; BL+ve, beta-lactamase positive; CIP<sup>R</sup>, ciprofloxacin resistant; GM<sup>R</sup>, gentamicin resistant; CTXNS, ceftriaxone non-susceptible

**Supplementary Table 8.** Minimum inhibitory concentrations (MICs) of CBD ( $\mu\text{g mL}^{-1}$ ) and comparators against 30 isolates of *Neisseria gonorrhoeae* by broth microdilution assay (n = 1), and 26 isolates by agar dilution assay (n = 3).

| Strain                       | Type                              | MIC ( $\mu\text{g mL}^{-1}$ ) |                               |                                            |                                            |                  |                        |                        |
|------------------------------|-----------------------------------|-------------------------------|-------------------------------|--------------------------------------------|--------------------------------------------|------------------|------------------------|------------------------|
|                              |                                   | Broth Microdilution           |                               |                                            |                                            | Agar Dilution    |                        |                        |
|                              |                                   | CBD                           | Azithromycin                  | Ceftriaxone                                | Ciprofloxacin                              | CBD              | Ceftriaxone            | Ciprofloxacin          |
| <i>Staphylococcus aureus</i> |                                   |                               |                               |                                            |                                            |                  |                        |                        |
| ATCC 29213                   | QC                                | 0.5                           | 0.5<br>(0.5-2) <sup>1</sup>   | 2<br>(1-8) <sup>1</sup>                    | 0.25<br>(0.12-0.5) <sup>1</sup>            |                  |                        |                        |
| <i>Neisseria gonorrhoeae</i> |                                   |                               |                               |                                            |                                            |                  |                        |                        |
| ATCC 49226                   | QC                                | 2                             | 0.25<br>(0.25-1) <sup>1</sup> | $\leq 0.008$<br>(0.016-0.004) <sup>1</sup> | $\leq 0.008$<br>(0.008-0.001) <sup>1</sup> | 4                | 0.015<br>(0.004-0.015) | 0.004<br>(0.001-0.008) |
| NCTC 13477                   | WHO F; CIP-S: AZI MIC 0.12        | 0.5                           | 0.06                          | $\leq 0.008$                               | $\leq 0.008$                               | 1                | $\leq 0.005$           | 0.004                  |
| NCTC 13478                   | WHO G; CIP-I: AZI MIC 0.25        | 2                             | 0.25                          | $\leq 0.008$                               | 0.06                                       | 2                | 0.015                  | 0.12                   |
| NCTC 13479                   | WHO K; CIP-R: AZI MIC 0.25        | 2                             | 0.25                          | 0.03                                       | >8                                         | 1                | 0.06                   | >8                     |
| NCTC 13480                   | WHO L; CIP-R: AZI MIC 0.5         | 0.5                           | 0.25                          | 0.06                                       | >8                                         | 2                | 0.25                   | >8                     |
| NCTC 13481                   | WHO M; CIP-R: AZI MIC 0.25        | 1                             | 0.12                          | $\leq 0.008$                               | 1                                          | 2                | 0.015                  | 2                      |
| NCTC 13482                   | WHO N; CIP-R: AZI MIC 0.25        | 2                             | 0.12                          | $\leq 0.008$                               | 4                                          | 1                | 0.008                  | 4                      |
| NCTC 13483                   | WHO O; CIP-S: AZI MIC 0.25        | 2                             | 0.25                          | $\leq 0.008$                               | $\leq 0.008$                               | 2                | 0.015                  | 0.015                  |
| NCTC 13484                   | WHO P; CIP-S: AZI MIC 4           | >32 <sup>2</sup>              | 4                             | $\leq 0.008$                               | $\leq 0.008$                               | >32 <sup>2</sup> | 0.008                  | 0.008                  |
| NCTC 13817                   | WHO U; CIP-S: AZI MIC 4           | 1                             | 2                             | $\leq 0.008$                               | $\leq 0.008$                               | 4                | 0.002                  | 0.004                  |
| NCTC 13818                   | WHO V; CIP-R: AZI MIC >256        | 1                             | >8                            | $\leq 0.008$                               | >8                                         | 1                | 0.03                   | >8                     |
| NCTC 13819                   | WHO W; CIP-R, AZI MIC 0.5         | 1                             | 0.25                          | 0.015                                      | >8                                         | 2                | 0.12                   | >8                     |
| NCTC 13820                   | WHO X; CRO-NS, CIP-R: AZI MIC 0.5 | 2                             | 0.25                          | 1                                          | >8                                         | 2                | 2                      | >8                     |
| NCTC 13821                   | WHO Y; CIP-R: AZI MIC 1           | 1                             | 0.5                           | 0.5                                        | >8                                         | 4                | 1                      | >8                     |
| MMX 10409                    | CIP-R                             | 2                             | 0.25                          | 0.015                                      | >8                                         | 2                | 0.03                   | >8                     |
| MMX 10410                    | CIP-S                             | 2                             | 0.12                          | $\leq 0.008$                               | $\leq 0.008$                               |                  |                        |                        |
| MMX 10447                    | CIP-S                             | 1                             | 0.06                          | $\leq 0.008$                               | $\leq 0.008$                               |                  |                        |                        |
| MMX 10450                    | CIP-S                             | 0.5                           | 0.12                          | $\leq 0.008$                               | $\leq 0.008$                               |                  |                        |                        |
| MMX 10452                    | CIP-R                             | 2                             | 0.12                          | $\leq 0.008$                               | >8                                         |                  |                        |                        |
| MMX 10454                    | CIP-R                             | 1                             | 0.12                          | 0.015                                      | 8                                          |                  |                        |                        |
| MMX 6921                     | CIP-R                             | 1                             | 8                             | $\leq 0.008$                               | 8                                          |                  |                        |                        |
| MMX 6938                     | CIP-S                             | 2                             | 0.25                          | $\leq 0.008$                               | $\leq 0.008$                               |                  |                        |                        |
| CDC 0165                     | CIP-R: AZI MIC 1                  | 8                             | 1                             | 0.015                                      | >8                                         | 2                | 0.06                   | >8                     |
| CDC 0166                     | CIP-R: AZI MIC 1                  | 2                             | 0.5                           | 0.015                                      | 8                                          | 2                | 0.06                   | >8                     |
| CDC 0167                     | CIP-S: AZI MIC 8                  | 1                             | >8                            | $\leq 0.008$                               | $\leq 0.008$                               | 2                | 0.008                  | 0.004                  |
| CDC 0172                     | CIP-R: AZI MIC 0.5                | 2                             | 0.25                          | $\leq 0.008$                               | 8                                          | 2                | 0.06                   | >8                     |
| CDC 0174                     | NA                                |                               |                               |                                            |                                            | 2                | 0.06                   | >8                     |
| CDC 0175                     | CIP-S: AZI MIC 16                 | 2                             | >8                            | $\leq 0.008$                               | $\leq 0.008$                               | 2                | 0.008                  | 0.004                  |
| CDC 0177                     | CIP-S: AZI MIC 2                  | 2                             | 2                             | $\leq 0.008$                               | $\leq 0.008$                               | 2                | 0.015                  | 0.015                  |
| CDC 0178                     | NA                                |                               |                               |                                            |                                            | 2                | 0.06                   | >8                     |
| CDC 0180                     | NA                                |                               |                               |                                            |                                            | 2                | 0.03                   | >8                     |
| CDC 0181                     | CIP-S: AZI MIC 256                | 1                             | >8                            | $\leq 0.008$                               | $\leq 0.008$                               | 1                | 0.015                  | 0.015                  |
| CDC 0194                     | CRO-NS, CIP-S: AZI MIC 0.5        | 2                             | 0.25                          | 0.03                                       | $\leq 0.008$                               | 2                | 0.25                   | 0.004                  |

<sup>1</sup>CLSI QC ranges shown in parentheses; <sup>2</sup>growth above 32  $\mu\text{g mL}^{-1}$  was unable to be determined due to CBD precipitation.

AZI, azithromycin; CRO, ceftriaxone; CIP, ciprofloxacin; S, susceptible; R, resistant; NS, non-susceptible; NG, no growth



**Supplementary Table 9.** Minimum inhibitory concentrations (MICs) of antibiotics and CBD ( $\mu\text{g mL}^{-1}$ ) against Gram-negative mutant bacteria.

| Species                                     | Strain                                                                                                        |             |             |            |            | CBD  |
|---------------------------------------------|---------------------------------------------------------------------------------------------------------------|-------------|-------------|------------|------------|------|
| <i>Escherichia coli</i> <sup>1</sup>        | Control strain, parent of mutant <i>E. coli</i> below                                                         |             |             |            |            | >128 |
| <i>Escherichia coli</i> <sup>1</sup>        | DC2                                                                                                           |             |             |            |            | >128 |
| <i>Escherichia coli</i> <sup>1</sup>        | Deficient in lpxC                                                                                             |             |             |            |            | 128  |
| <i>Escherichia coli</i> <sup>1</sup>        | tolC efflux pump                                                                                              |             |             |            |            | >128 |
| <i>Escherichia coli</i> <sup>1</sup>        | Mutant of lpxC and tolC                                                                                       |             |             |            |            | 128  |
| <i>Pseudomonas aeruginosa</i> <sup>1</sup>  | PAO1 expressing MexAB-OprM,                                                                                   |             |             |            |            | >128 |
| <i>Pseudomonas aeruginosa</i> <sup>1</sup>  | Efflux pump mutant: d(mex-oprM) d(mexCD-oprJ) d(mexEF-oprN) d(mexJKL) d(mexXY) d(opmH) d(pscC), PAO750 PAO397 |             |             |            |            | >128 |
| Species                                     | Strain                                                                                                        | Polymyxin B | Teicoplanin | Gentamicin | CBD        |      |
| <i>Acinetobacter baumannii</i> <sup>1</sup> | ATCC 19606 parent strain                                                                                      | 0.25-0.5    | >128        | 32-64      | >128       |      |
| <i>Acinetobacter baumannii</i> <sup>1</sup> | AL1851, lpxA mutant; Lipid A deficient                                                                        | 128->128    | 0.125-0.5   | 0.5-2      | 0.125-0.25 |      |

<sup>1</sup>MIC assays at UQ (n = 4)

**Supplementary Table 10.** Broth microdilution MIC ( $\mu\text{g mL}^{-1}$ ) synergy assay of CBD in combination with colistin, polymyxin B and polymyxin B nonapeptide against Gram-negative bacteria. Data is n=2 with all data points presented.

|            |                                |                        |                                   | CBD MIC ( $\mu\text{g mL}^{-1}$ ) with Colistin at conc ( $\mu\text{g mL}^{-1}$ ) of |      |       |      | Colistin MIC ( $\mu\text{g mL}^{-1}$ ) |
|------------|--------------------------------|------------------------|-----------------------------------|--------------------------------------------------------------------------------------|------|-------|------|----------------------------------------|
| Antibiotic | Species                        | Strain/Description     | CBD MIC ( $\mu\text{g mL}^{-1}$ ) | 0.5                                                                                  | 0.25 | 0.125 | 0.06 |                                        |
| Colistin   | <i>Escherichia coli</i>        | ATCC 25922 FDA control | 64                                |                                                                                      | 1    | 4     | >64  | 0.5                                    |
|            |                                |                        | >64                               |                                                                                      | 0.5  | 8     | >64  | 0.5                                    |
|            | <i>Klebsiella pneumoniae</i>   | ATCC 700603 ESBL       | >64                               |                                                                                      | 4    | >64   | >64  | 0.5                                    |
|            |                                |                        | >64                               |                                                                                      | >64  | >64   | >64  | 0.5                                    |
|            | <i>Acinetobacter baumannii</i> | ATCC 19606 Type strain | >64                               | 1                                                                                    | 1    | 16    | 8    | 1                                      |
|            |                                |                        | >64                               | 8                                                                                    | >64  | >64   | >64  | 1                                      |
|            | <i>Pseudomonas aeruginosa</i>  | ATCC 27853 QC strain   | >64                               |                                                                                      | >64  | >64   | >64  | 0.5                                    |
|            |                                |                        | >64                               |                                                                                      | >64  | >64   | >64  | 0.5                                    |

The grey/yellow shaded values indicate synergy, where synergy is defined by FICI value of  $\leq 0.5$ .

Where no value is given, CBD concentration is irrelevant as the combination is at the MIC concentration of colistin.

| CBD with Colistin FICI values |                                |                        |       |       |       |       |  |
|-------------------------------|--------------------------------|------------------------|-------|-------|-------|-------|--|
| Antibiotic                    | Species                        | Strain/Description     | 0.5   | 0.25  | 0.125 | 0.06  |  |
| Colistin                      | <i>Escherichia coli</i>        | ATCC 25922 FDA control |       | 0.516 | 0.313 |       |  |
|                               |                                |                        |       | 0.508 | 0.375 |       |  |
|                               | <i>Klebsiella pneumoniae</i>   | ATCC 700603 ESBL       |       |       | 0.563 |       |  |
|                               |                                |                        |       |       |       |       |  |
|                               | <i>Acinetobacter baumannii</i> | ATCC 19606 Type strain | 0.516 | 0.266 | 0.375 | 0.185 |  |
|                               |                                |                        | 0.625 |       |       |       |  |
|                               | <i>Pseudomonas aeruginosa</i>  | ATCC 27853 QC strain   |       |       |       |       |  |
|                               |                                |                        |       |       |       |       |  |

FICI scores were calculated using an MIC of  $64 \mu\text{g mL}^{-1}$  for cannabidiol.

The shaded values indicate synergy, where synergy is defined by FICI value of  $\leq 0.5$ .

Where an FICI value is not displayed one could not be calculated as there was no relevant inhibitory activity to record, i.e. either CBD inactive  $>64 \mu\text{g mL}^{-1}$  or concentration was equal to the MIC of colistin.

|             |                                |                        |                                   | CBD MIC ( $\mu\text{g mL}^{-1}$ ) with Polymyxin B at conc ( $\mu\text{g mL}^{-1}$ ) of |      |       |      | Polymyxin B MIC ( $\mu\text{g mL}^{-1}$ ) |
|-------------|--------------------------------|------------------------|-----------------------------------|-----------------------------------------------------------------------------------------|------|-------|------|-------------------------------------------|
| Antibiotic  | Species                        | Strain/Description     | CBD MIC ( $\mu\text{g mL}^{-1}$ ) | 0.5                                                                                     | 0.25 | 0.125 | 0.06 |                                           |
| Polymyxin B | <i>Escherichia coli</i>        | ATCC 25922 FDA control | 64                                |                                                                                         |      | >64   | >64  | 0.25                                      |
|             |                                |                        | >64                               |                                                                                         | 32   | 16    | >64  | 0.5                                       |
|             | <i>Klebsiella pneumoniae</i>   | ATCC 700603 ESBL       | >64                               | 4                                                                                       | >64  | >64   | >64  | 1                                         |
|             |                                |                        | >64                               | 4                                                                                       | >64  | >64   | >64  | 1                                         |
|             | <i>Acinetobacter baumannii</i> | ATCC 19606 Type strain | >64                               | 1                                                                                       | 4    | >64   | >64  | 1                                         |
|             |                                |                        | >64                               | >64                                                                                     | >64  | >64   | >64  | 1                                         |
|             | <i>Pseudomonas aeruginosa</i>  | ATCC 27853 QC strain   | >64                               |                                                                                         | >64  | >64   | >64  | 0.5                                       |
|             |                                |                        | >64                               |                                                                                         | >64  | >64   | >64  | 0.5                                       |

The grey/yellow shaded values indicate synergy, where synergy is defined by FICI value of  $\leq 0.5$ .

Where no value is given, CBD concentration is irrelevant as the combination is at the MIC concentration of polymyxin B.

| CBD with Polymyxin B FICI values |                                |                        |     |       |       |      |  |
|----------------------------------|--------------------------------|------------------------|-----|-------|-------|------|--|
| Antibiotic                       | Species                        | Strain/Description     | 0.5 | 0.25  | 0.125 | 0.06 |  |
| Polymyxin B                      | <i>Escherichia coli</i>        | ATCC 25922 FDA control |     | 1.063 |       |      |  |
|                                  |                                |                        |     | 1.000 | 0.5   |      |  |
|                                  | <i>Klebsiella pneumoniae</i>   | ATCC 700603 ESBL       |     | 0.563 |       |      |  |
|                                  |                                |                        |     | 0.563 |       |      |  |
|                                  | <i>Acinetobacter baumannii</i> | ATCC 19606 Type strain |     | 0.516 | 0.313 |      |  |
|                                  |                                |                        |     |       |       |      |  |
|                                  | <i>Pseudomonas aeruginosa</i>  | ATCC 27853 QC strain   |     |       |       |      |  |
|                                  |                                |                        |     |       |       |      |  |

FICI scores were calculated using an MIC of  $64 \mu\text{g mL}^{-1}$  for cannabidiol.

The shaded values indicate synergy, where synergy is defined by FICI value of  $\leq 0.5$ .

Where an FICI value is not displayed one could not be calculated as there was no relevant inhibitory activity to record, i.e. either CBD inactive  $>64 \mu\text{g mL}^{-1}$  or concentration was equal to the MIC of polymyxin B.

|            |                                |                        |                                   | CBD MIC ( $\mu\text{g mL}^{-1}$ ) with PMBN at conc ( $\mu\text{g mL}^{-1}$ ) of |      |      |      |      |      | PMBN MIC ( $\mu\text{g mL}^{-1}$ ) |     |
|------------|--------------------------------|------------------------|-----------------------------------|----------------------------------------------------------------------------------|------|------|------|------|------|------------------------------------|-----|
| Antibiotic | Species                        | Strain/Description     | CBD MIC ( $\mu\text{g mL}^{-1}$ ) | 32                                                                               | 16   | 8    | 4    | 2    | 1    |                                    |     |
| PMBN       | <i>Escherichia coli</i>        | ATCC 25922 FDA control | >256                              | 64                                                                               | 64   | 64   | 64   | 64   | 64   | >32                                |     |
|            |                                |                        | >256                              | 64                                                                               | >256 | >256 | >256 | 64   | 64   | >32                                |     |
|            |                                |                        | >256                              | 64                                                                               | 64   | 64   | 64   | >256 | >256 | >32                                |     |
|            |                                |                        | >256                              | 64                                                                               | 64   | >256 | >256 | >256 | >256 | >32                                |     |
|            | <i>Klebsiella pneumoniae</i>   | ATCC 700603 ESBL       | >256                              | 64                                                                               | >256 | >256 | >256 | >256 | >256 | >256                               | >32 |
|            |                                |                        | >256                              | 32                                                                               | 32   | 32   | 64   | >256 | >256 | >32                                |     |
|            |                                |                        | >256                              | >256                                                                             | >256 | >256 | >256 | >256 | >256 | >32                                |     |
|            | <i>Acinetobacter baumannii</i> | ATCC 19606 Type strain | >256                              | 32                                                                               | 32   | 32   | 32   | 32   | 32   | 32                                 | >32 |
|            |                                |                        | >256                              | 32                                                                               | 32   | 32   | 32   | 32   | 32   | >32                                |     |
|            |                                |                        | >256                              | 32                                                                               | 32   | 32   | 32   | 64   | >256 | >32                                |     |
|            |                                |                        | >256                              | 32                                                                               | 32   | 32   | 32   | 64   | 64   | >32                                |     |
|            | <i>Pseudomonas aeruginosa</i>  | ATCC 27853 QC strain   | >256                              | 32                                                                               | 64   | 64   | 64   | 64   | 64   | >32                                |     |
|            |                                |                        | >256                              | 32                                                                               | 32   | 32   | 32   | 64   | 64   | >32                                |     |
|            |                                |                        | >256                              | 16                                                                               | 32   | 64   | 32   | 32   | >256 | >32                                |     |
|            |                                |                        | >256                              | 16                                                                               | 32   | 64   | 32   | 32   | >256 | >32                                |     |

The grey/yellow shaded values indicate synergy, where synergy is defined by FICI value of  $\leq 0.5$ .

Where no value is given, CBD concentration is irrelevant as the combination is at the MIC concentration of polymyxin B.

| CBD with PMBN FICI values |                                |                        |       |       |       |       |        |       |
|---------------------------|--------------------------------|------------------------|-------|-------|-------|-------|--------|-------|
| Antibiotic                | Species                        | Strain/Description     | 32    | 16    | 8     | 4     | 2      | 1     |
| PMBN                      | <i>Escherichia coli</i>        | ATCC 25922 FDA control | 1.25  | 0.75  | 0.5   | 0.375 | 0.3125 | 0.281 |
|                           |                                |                        | 1.25  | 1.5   | 1.25  | 1.125 | 0.3125 | 0.281 |
|                           |                                |                        | 1.25  | 0.75  | 0.5   | 0.375 | 1.062  | 1.031 |
|                           |                                |                        | 1.25  | 0.75  | 1.25  | 1.125 | 1.062  | 1.031 |
|                           | <i>Klebsiella pneumoniae</i>   | ATCC 700603 ESBL       | 1.25  | 1.5   | 1.25  | 1.125 | 1.062  | 1.031 |
|                           |                                |                        | 1.125 | 0.625 | 0.375 | 0.375 | 1.062  | 1.031 |
|                           |                                |                        | 2     | 1.5   | 1.25  | 1.125 | 1.062  | 1.031 |
|                           |                                |                        | 2     | 1.5   | 1.25  | 1.125 | 1.062  | 1.031 |
|                           | <i>Acinetobacter baumannii</i> | ATCC 19606 Type strain | 1.125 | 0.625 | 0.375 | 0.25  | 0.188  | 0.156 |
|                           |                                |                        | 1.125 | 0.625 | 0.375 | 0.25  | 0.188  | 0.156 |
|                           |                                |                        | 1.125 | 0.625 | 0.375 | 0.25  | 0.312  | 1.031 |
|                           |                                |                        | 1.125 | 0.625 | 0.375 | 0.25  | 0.312  | 0.281 |
|                           | <i>Pseudomonas aeruginosa</i>  | ATCC 27853 QC strain   | 1.125 | 0.75  | 0.5   | 0.375 | 0.312  | 0.281 |
|                           |                                |                        | 1.125 | 0.625 | 0.375 | 0.25  | 0.312  | 0.281 |
|                           |                                |                        | 1.062 | 0.625 | 0.5   | 0.25  | 0.187  | 1.031 |
|                           |                                |                        | 1.062 | 0.625 | 0.5   | 0.25  | 0.187  | 1.031 |

FICI scores were calculated using an MIC of  $64 \mu\text{g mL}^{-1}$  for cannabidiol.

The shaded values indicate synergy, where synergy is defined by FICI value of  $\leq 0.5$ .

Where an FICI value is not displayed one could not be calculated as there was no relevant inhibitory activity to record, i.e. either CBD inactive  $>64 \mu\text{g mL}^{-1}$  or concentration was equal to the MIC of polymyxin B.

**Supplementary Table 11.** Frequency resistanceTiter of 18 h stationary phase culture of *Staphylococcus aureus* (MRSA ATCC 43300)

| Dilution Tube    | Cfu per plate |      | Average cfu per plate | Dilution factor | Average cfu mL <sup>-1</sup>  |
|------------------|---------------|------|-----------------------|-----------------|-------------------------------|
| 10 <sup>-6</sup> | 1728          | 2368 | 2048                  | 10 <sup>7</sup> | 2.05 × 10 <sup>10</sup>       |
| 10 <sup>-7</sup> | 832           | 728  | 780                   | 10 <sup>8</sup> | 7.80 × 10 <sup>10</sup>       |
| 10 <sup>-8</sup> | 332           | 264  | 298                   | 10 <sup>9</sup> | 2.98 × 10 <sup>11</sup>       |
|                  |               |      |                       |                 | <b>1.32 × 10<sup>11</sup></b> |

**Resistance Determination**

| CBD conc. in plate<br>(Fold MIC) | Colony Counts on Plate<br>(MRSA dilution tube/volume applied) |   |                           |   | Average<br>cfu per<br>plate | Resistance<br>frequency        |
|----------------------------------|---------------------------------------------------------------|---|---------------------------|---|-----------------------------|--------------------------------|
|                                  | Neat in 100µL                                                 |   | 10 <sup>-1</sup> in 100µL |   |                             |                                |
| 16×                              | 0                                                             | 0 | 0                         | 0 | 0                           | -                              |
| 8×                               | 0                                                             | 0 | 0                         | 0 | 0                           | -                              |
| 4×                               | 0                                                             | 0 | 0                         | 0 | 0                           | -                              |
| 2×                               | 5                                                             | 0 | 0                         | 0 | 5                           | <b>3.78 × 10<sup>-10</sup></b> |

**Supplementary Table 12.** Haemolysis Data

| Compound Name | ARCBS whole blood                       |      |                                         |      |
|---------------|-----------------------------------------|------|-----------------------------------------|------|
|               | HC <sub>10</sub> (µg mL <sup>-1</sup> ) |      | HC <sub>50</sub> (µg mL <sup>-1</sup> ) |      |
| Melittin      | 3.42                                    | 3.63 | 5.93                                    | 5.71 |
| Cannabidiol   | >256                                    | >256 | >256                                    | >256 |
|               | >256                                    | >256 | >256                                    | >256 |
|               | >256                                    | >256 | >256                                    | >256 |

ARCBS, Australian Red Cross Blood Service.

HC<sub>10</sub>/HC<sub>50</sub>, concentration required to induce 10% and 50% haemolysis.**Supplementary Table 13.** Cytotoxicity Data

| Compound Name | HEK-293<br>(ATCC CRL-1573)              |      |
|---------------|-----------------------------------------|------|
|               | CC <sub>50</sub> (µg mL <sup>-1</sup> ) |      |
| Tamoxifen     | 15.5                                    | 13.3 |
| Cannabidiol   | 231                                     | 247  |
|               | 244                                     | 251  |
|               | 224                                     | 194  |

CC<sub>50</sub>, concentration required to induce 50% cell cytotoxicity/growth inhibition.

**Supplementary Table 14.** Topical CBD formulation compositions.

| Formulation Number                   | 1         | 2         | 3         | 4        | 5         | 6         | 7         | 8         | 9         | 10        | 11        | 12        |
|--------------------------------------|-----------|-----------|-----------|----------|-----------|-----------|-----------|-----------|-----------|-----------|-----------|-----------|
| <b>Ingredients (%w/w)</b>            |           |           |           |          |           |           |           |           |           |           |           |           |
| Dow Q7-9180 Silicone Fluid 0.65 cst  | 0         | 0         | 0         | 92       | 44.5      | 13.3      | 3.5       | 57.3      | 42        | 47        | 67        | 33.5      |
| Dow Q7-9120 Silicone Fluid 12500 cst | 0         | 0         | 0         | 1        | 0         | 2.0       | 2.5       | 0         | 0         | 0         | 0         | 0         |
| Dow 9045 Silicone Elastomer Blend    | 0         | 0         | 0         | 0        | 25        | 69.7      | 79.0      | 18.3      | 0         | 0         | 0         | 0         |
| Dow Corning BY 11-030                | 0         | 0         | 0         | 0        | 0         | 0         | 0         | 0         | 0         | 0         | 17        | 15        |
| Arlamol PS15E                        | 0         | 14.1      | 0         | 2        | 8         | 5.0       | 5.3       | 4.6       | 3         | 10        | 3         | 0         |
| Dow Corning 9041 Elastomer Blend     | 0         | 0         | 0         | 0        | 0         | 0         | 0         | 0         | 25        | 0         | 0         | 0         |
| Compritol 888 ATO                    | 0         | 0         | 0         | 0        | 10        | 0         | 0         | 0         | 10        | 0         | 0         | 0         |
| Petrolatum                           | 80        | 0         | 0         | 0        | 2.5       | 0         | 0         | 0         | 0         | 0         | 0         | 0         |
| Castorwax                            | 0         | 0         | 0         | 0        | 0         | 0         | 0         | 7.6       | 0         | 0         | 0         | 0         |
| Isopropyl Alcohol                    | 0         | 3.4       | 0         | 0        | 0         | 0         | 0         | 2.3       | 0         | 3         | 2         | 0         |
| Isopropyl Myristate                  | 0         | 0         | 0         | 0        | 0         | 0         | 0         | 0         | 5         | 0         | 0         | 0         |
| Plural diisostearique                | 0         | 0         | 0         | 0        | 0         | 0         | 0         | 0         | 2         | 0         | 0         | 0         |
| Monosteol (PG Stearate)              | 0         | 0         | 0         | 0        | 0         | 0         | 0         | 0         | 3         | 0         | 0         | 0         |
| Transcutol                           | 0         | 62.5      | 0         | 0        | 0         | 0         | 0         | 0         | 0         | 20        | 0         | 30        |
| PEG 400                              | 0         | 0         | 50        | 0        | 0         | 0         | 0         | 0         | 0         | 0         | 0         | 0         |
| PEG 4000                             | 0         | 0         | 30        | 0        | 0         | 0         | 0         | 0         | 0         | 0         | 0         | 0         |
| Water                                | 0         | 0         | 0         | 0        | 0         | 0         | 0         | 0         | 0         | 0         | 1         | 1.5       |
| <b>Cannabidiol</b>                   | <b>20</b> | <b>20</b> | <b>20</b> | <b>5</b> | <b>10</b> | <b>10</b> | <b>10</b> | <b>10</b> | <b>10</b> | <b>20</b> | <b>10</b> | <b>20</b> |
