# Supplementary material for: The antimicrobial potential of cannabidiol
Source: Commun Biol. 2021 Jan 19;4:7. doi: 10.1038/s42003-020-01530-y (PMC7815910; doi:10.1038/s42003-020-01530-y)
Supplement: Supplementary file 3 — Supplementary Data 1 [file 42003_2020_1530_MOESM3_ESM.xlsx]

## Sheet: Fig 1c
Fig 1C Time kill Assay
		0.25 μg/mL				0.5 μg/mL				1 μg/mL				2 μg/mL				4 μg/mL				8 μg/mL				Bacteria				Limit of detection
0 h	0	5.44716	5.41497	5.5563	5.50515	5.47712	5.53148	5.5563	5.47712	5.50515	5.44716	5.38021	5.53148	5.47712	5.5563	5.64345	5.47712	5.41497	5.38021	5.47712	5.44716	5.34242	5.50515	5.41497	5.30103	5.50515	5.5563	5.47712	5.66276	2
1 h	1	5.34242	5.14613	5.30103	5.20412	5.25527	5.30103	5.34242	5.07918	5.07918	4.90309	4.90309	5.20412	3.90309	4.38021	4.14613	4	3.90309	3.60206	3.90309	3.90309	3.30103	3.30103	3.30103	3.60206					2
2 h	2	6.20412	6.07918	6.20412	5.77815	6	6.20412	6.07918	6.34242	6.77815	6.60206	6.60206	6.30103	4.20412	4.07918	4.25527	4.20412	3.60206	3.77815	3.60206	2	3.30103	2	2	2	6.38021	6.5563	6.34242	6.41497	2
3 h	3	6.38021	6.34242	6.38021	6.25527	6.14613	6.41497	6.34242	6.34242	5.30103	5.14613	5.07918	5.07918	3.30103	2	2	2	2	2	2	2	2	2	2	2					2
4 h	4	6.60206	7.20412	6.77815	6.60206	6.77815	6.90309	6.77815	6.60206	5.30103	5.30103	5.60206	2	2	2	2	2	2	2	2	2	2	2	2	2	7.14613	7.34242	7.25527	7.38021	2
6 h	6	8.69897	8.66276	8.62325	8.64345	8.44716	8.57978	8.41497	8.68124	6.07918	6.14613	5.30103	2	2	2	2	2	2	2	2	2	2	2	2	2	8.83251	8.64345	8.716	8.80618	2
24 h	24	9.31387	9.31387	9.31387	9.31387	9.31387	9.31387	9.31387	9.31387	9.31387	9.31387	9.31387	9.31387	2	2	2	2	2	2	2	2	2	2	2	2	9.31387	9.31387	9.31387	9.31387	2

## Sheet: Fig 1b,1d 
See SI for Tables of MIC values
S. aureus MIC distribution (µg mL-1) broth microdilution assay (132 Australian isolates
MIC:	0.015	0.03	0.06	0.125	0.25	0.5	1	2	4	8	16	≥ 32														MIC:	0.015	0.03	0.06	0.125	0.25	0.5	1	2	4	8	16	≥ 32
Daptomycin	0	0	0	0	0	2	46	68	12	3	1	0														Daptomycin	0	0	0	0	0	2	48	116	128	131	132	132
dap-1	0	0	0	1	0	11	42	60	14	2	1	0														dap-1	0	0	0	1	1	12	54	114	128	130	131	131
dap-2	0	0	0	0	0	16	35	63	12	3	1	0														dap-2	0	0	0	0	0	16	51	114	126	129	130	130
dap-3	0	0	0	0	1	4	54	45	10	3	1	0														dap-3	0	0	0	0	1	5	59	104	114	117	118	118
dap-4	0	0	0	0	1	1	43	39	10	3	1	0														dap-4	0	0	0	0	1	2	45	84	94	97	98	98
Vancomycin	0	0	0	0	0	2	106	16	3	2	0	3														Vancomycin	0	0	0	0	0	2	108	124	127	129	129	132
van-1	0	0	0	0	0	10	99	14	3	3	0	3														van-1	0	0	0	0	0	10	109	123	126	129	129	132
van-2	0	0	0	0	0	8	101	14	1	2	1	3														van-2	0	0	0	0	0	8	109	123	124	126	127	130
van-3	0	0	0	0	0	1	100	11	2	2	1	2														van-3	0	0	0	0	0	1	101	112	114	116	117	119
van-4	0	0	0	0	1	0	82	7	2	5		2														van-4	0	0	0	0	1	1	83	90	92	97	97	99
Mupirocin	0	0	0	5	41	75	3	1	1	0	1	5														Mupirocin	0	0	0	5	46	121	124	125	126	126	127	132
mup-1	0	1	2	10	53	54	2	2	1	0	1	6														mup-1	0	1	3	13	66	120	122	124	125	125	126	132
mup-2	0	0	1	8	59	52	4	1	0	0	1	5														mup-2	0	0	1	9	68	120	124	125	125	125	126	131
mup-3	0	0	1	3	43	60	4	1	0	0	2	6														mup-3	0	0	1	4	47	107	111	112	112	112	114	120
mup-4	0	0	1	3	35	49	3	0	0	0	2	6														mup-4	0	0	1	4	39	88	91	91	91	91	93	99
Clindamycin	0	10	26	54	1	0	2	0	1	1	0	37														Clindamycin	0	10	36	90	91	91	93	93	94	95	95	132
cli-1	0	24	28	32	4	1	2	1	1	2	0	37														cli-1	0	24	52	84	88	89	91	92	93	95	95	132
cli-2	0	20	34	35	1	0	2	1	2	1	0	36														cli-2	0	20	54	89	90	90	92	93	95	96	96	132
cli-3	0	11	28	38	0	1	2	0	0	1	0	36														cli-3	0	11	39	77	77	78	80	80	80	81	81	117
cli-4	0	11	22	39	1	1	2	0	0	0	0	29														cli-4	0	11	33	72	73	74	76	76	76	76	76	105
Cannabidiol	0	0	0	0	1	0	6	106	18	1	0	0														Cannabidiol	0	0	0	0	1	1	7	113	131	132	132	132
cbd-1	0	0	0	0	0	2	6	94	27	1	0	0														cbd-1	0	0	0	0	0	2	8	102	129	130	130	130
cbd-2	0	0	0	0	1	0	7	105	18	1	0	0														cbd-2	0	0	0	0	1	1	8	113	131	132	132	132
cbd-3	0	0	0	0	1	1	44	69	2	1	0	0														cbd-3	0	0	0	0	1	2	46	115	117	118	118	118
cbd-4	0	0	0	0	1	0	42	52	0	1	0	0														cbd-4	0	0	0	0	1	1	43	95	95	96	96	96
MIC:	0.015	0.03	0.06	0.125	0.25	0.5	1	2	4	8	16	≥ 32															0.015	0.03	0.06	0.125	0.25	0.5	1	2	4	8	16	≥ 32
Daptomycin	0	0	0	0	0	2	48	116	128	131	132	132														Daptomycin	0	0	0	0	0	1.51515	36.3636	87.8788	96.9697	99.2424	100	100
dap-1	0	0	0	1	1	12	54	114	128	130	131	131														dap-1	0	0	0	0.763359	0.763359	9.16031	41.2214	87.0229	97.7099	99.2366	100	100
dap-2	0	0	0	0	0	16	51	114	126	129	130	130														dap-2	0	0	0	0	0	12.3077	39.2308	87.6923	96.9231	99.2308	100	100
dap-3	0	0	0	0	1	5	59	104	114	117	118	118														dap-3	0	0	0	0	0.847458	4.23729	50	88.1356	96.6102	99.1525	100	100
dap-4	0	0	0	0	1	2	45	84	94	97	98	98														dap-4	0	0	0	0	1.02041	2.04082	45.9184	85.7143	95.9184	98.9796	100	100
Vancomycin	0	0	0	0	0	2	108	124	127	129	129	132														Vancomycin	0	0	0	0	0	1.51515	81.8182	93.9394	96.2121	97.7273	97.7273	100
van-1	0	0	0	0	0	10	109	123	126	129	129	132														van-1	0	0	0	0	0	7.57576	82.5758	93.1818	95.4545	97.7273	97.7273	100
van-2	0	0	0	0	0	8	109	123	124	126	127	130														van-2	0	0	0	0	0	6.15385	83.8462	94.6154	95.3846	96.9231	97.6923	100
van-3	0	0	0	0	0	1	101	112	114	116	117	119														van-3	0	0	0	0	0	0.840336	84.8739	94.1176	95.7983	97.479	98.3193	100
van-4	0	0	0	0	1	1	83	90	92	97	97	99														van-4	0	0	0	0	1.0101	1.0101	83.8384	90.9091	92.9293	97.9798	97.9798	100
Mupirocin	0	0	0	5	46	121	124	125	126	126	127	132														Mupirocin	0	0	0	3.78788	34.8485	91.6667	93.9394	94.697	95.4545	95.4545	96.2121	100
mup-1	0	1	3	13	66	120	122	124	125	125	126	132														mup-1	0	0.757576	2.27273	9.84848	50	90.9091	92.4242	93.9394	94.697	94.697	95.4545	100
mup-2	0	0	1	9	68	120	124	125	125	125	126	131														mup-2	0	0	0.763359	6.87023	51.9084	91.6031	94.6565	95.4198	95.4198	95.4198	96.1832	100
mup-3	0	0	1	4	47	107	111	112	112	112	114	120														mup-3	0	0	0.833333	3.33333	39.1667	89.1667	92.5	93.3333	93.3333	93.3333	95	100
mup-4	0	0	1	4	39	88	91	91	91	91	93	99														mup-4	0	0	1.0101	4.0404	39.3939	88.8889	91.9192	91.9192	91.9192	91.9192	93.9394	100
Clindamycin	0	10	36	90	91	91	93	93	94	95	95	132														Clindamycin	0	7.57576	27.2727	68.1818	68.9394	68.9394	70.4545	70.4545	71.2121	71.9697	71.9697	100
cli-1	0	24	52	84	88	89	91	92	93	95	95	132														cli-1	0	18.1818	39.3939	63.6364	66.6667	67.4242	68.9394	69.697	70.4545	71.9697	71.9697	100
cli-2	0	20	54	89	90	90	92	93	95	96	96	132														cli-2	0	15.1515	40.9091	67.4242	68.1818	68.1818	69.697	70.4545	71.9697	72.7273	72.7273	100
cli-3	0	11	39	77	77	78	80	80	80	81	81	117														cli-3	0	9.40171	33.3333	65.812	65.812	66.6667	68.3761	68.3761	68.3761	69.2308	69.2308	100
cli-4	0	11	33	72	73	74	76	76	76	76	76	105														cli-4	0	10.4762	31.4286	68.5714	69.5238	70.4762	72.381	72.381	72.381	72.381	72.381	100
Cannabidiol	0	0	0	0	1	1	7	113	131	132	132	132														Cannabidiol	0	0	0	0	0.757576	0.757576	5.30303	85.6061	99.2424	100	100	100
cbd-1	0	0	0	0	0	2	8	102	129	130	130	130														cbd-1	0	0	0	0	0	1.53846	6.15385	78.4615	99.2308	100	100	100
cbd-2	0	0	0	0	1	1	8	113	131	132	132	132														cbd-2	0	0	0	0	0.757576	0.757576	6.06061	85.6061	99.2424	100	100	100
cbd-3	0	0	0	0	1	2	46	115	117	118	118	118														cbd-3	0	0	0	0	0.847458	1.69492	38.9831	97.4576	99.1525	100	100	100
cbd-4	0	0	0	0	1	1	43	95	95	96	96	96														cbd-4	0	0	0	0	1.04167	1.04167	44.7917	98.9583	98.9583	100	100	100
																											0
S. aureus MIC distribution (µg mL-1) broth microdilution assay (100 USA isolates
MIC:	0.015	0.03	0.06	0.125	0.25	0.5	1	2	4	8	16	≥ 32
Oxacillin	0	0	0	3	17	16	13	1	2	0	2	46
Levofloxacin	0	1	2	25	25	2	0	1	15	7	10	12
Erythromycin	0	0	0	0	23	19	2	0	0	2	2	52
Vancomycin	0	0	0	0	2	56	39	1	2	0	0	0
Mupirocin	0	0	0	0	92	0	0	0	1	0	1	6
Clindamycin	1	0	27	48	7	0	0	0	0	0	0	17
Cannabidiol	0	0	0	0	0	0	97	3	0	0	0	0
MIC:	0.015	0.03	0.06	0.125	0.25	0.5	1	2	4	8	16	≥ 32
Oxacillin	0	0	0	3	20	36	49	50	52	52	54	100
Levofloxacin	0	1	3	28	53	55	55	56	71	78	88	100
Erythromycin	0	0	0	0	23	42	44	44	44	46	48	100
Vancomycin	0	0	0	0	2	58	97	98	100	100	100	100
Mupirocin	0	0	0	0	92	92	92	92	93	93	94	100
Clindamycin	1	1	28	76	83	83	83	83	83	83	83	100
Cannabidiol	0	0	0	0	0	0	97	100	100	100	100	100
N. gonorrheae MIC distribution (µg mL-1) broth microdilution assay (30 isolates)
MIC:	≤0.004	0.008	0.015	0.03	0.06	0.12	0.25	0.5	1	2	4	8	>8
Ceftriaxone	20	0	5	2	1	0	0	1	1	0	0	0	0
Azithromycin	0	0	0	0	2	6	11	2	1	2	1	1	4
Ciprofloxacin	14	0	0	0	1	0	0	0	1	0	1	4	9
Cannabidiol	0	0	0	0	0	0	0	3	10	15	0	1	1
MIC:	≤0.004	0.008	0.015	0.03	0.06	0.12	0.25	0.5	1	2	4	8	>8
Ceftriaxone	20	20	25	27	28	28	28	29	30	30	30	30	30
Azithromycin	0	0	0	0	2	8	19	21	22	24	25	26	30
Ciprofloxacin	14	14	14	14	15	15	15	15	16	16	17	21	30
Cannabidiol	0	0	0	0	0	0	0	3	13	28	28	29	30
N. gonorrheae MIC distribution (µg mL-1) agar dilution assay (26 isolates)
MIC:	≤0.004	0.008	0.015	0.03	0.06	0.12	0.25	0.5	1	2	4	8	>8
Ceftriaxone	2	4	6	3	6	1	2	0	1	1	0	0	0
Cef-1	3	5	6	1	6	1	2	0	0	1	0	0	0
Cef-2	2	2	6	4	5	3	1	0	1	1	0	0	0
Cef-3	2	5	3	10	0	3	1	0	1	1	0	0	0
Ciprofloxacin	6	1	3	0	0	1	0	0	0	1	1		13
cip-1	6	1	3	0	0	1	0	0	0	1	2	0	11
cip-2	4	3	2	1	0	1	0	0	0	1	1	0	13
cip-3	6	1	3	0	0	1	0	0	0	1	0	4	10
Cannabidiol	0	0	0	0	0	0	0	0	5	17	3	0	1
cbd-1	0	0	0	0	0	0	0	2	14	9	0	0	0
cbd-2	0	0	0	0	0	0	0	0	0	10	12	1	3
cbd-3	0	0	0	0	0	0	0	1	7	15	2	0	1
MIC:	≤0.004	0.008	0.015	0.03	0.06	0.12	0.25	0.5	1	2	4	8	>8
Ceftriaxone	2	6	12	15	21	22	24	24	25	26	26	26	26
Cef-1	3	8	14	15	21	22	24	24	24	25	25	25	25
Cef-2	2	4	10	14	19	22	23	23	24	25	25	25	25
Cef-3	2	7	10	20	20	23	24	24	25	26	26	26	26
Ciprofloxacin	6	7	2	10	10	11	11	11	11	12	13	13	26
cip-1	6	7	3	10	10	11	11	11	11	12	14	14	25
cip-2	4	7	4	10	10	11	11	11	11	12	13	13	26
cip-3	6	7	5	10	10	11	11	11	11	12	12	16	26
Cannabidiol	0	0	0	0	0	0	0	0	5	22	25	25	26
cbd-1	0	0	0	0	0	0	0	2	16	25	25	25	25
cbd-2	0	0	0	0	0	0	0	0	0	10	22	23	26
cbd-3	0	0	0	0	0	0	0	1	8	23	25	25	26

## Sheet: Fig 1d agar replicate data
Table 1. In vitro activity of CBD and comparators against 26 isolates of Neisseria gonorrhoeae
Isolate			Type			Run			MIC (µg/mL)
									CBD			CIP				CRO
ATCC 49226			QC			1			2			0.004 (0.001-0.008)1				0.015 (0.004-0.015)1
						2			4			0.004 (0.001-0.008)1				0.015 (0.004-0.015)1
						3			4			0.004 (0.001-0.008)1				0.03 (0.004-0.015)1
						Median			4			0.004				0.015
NCTC 13477			WHO F; CIP-S, AZI MIC 0.12			1			1			0.004				≤0.0005
						2			2			0.004				*
						3			1			0.004				≤0.0005
						Median			1			0.004				≤0.0005
NCTC 13478			WHO G; CIP-I, AZI MIC 0.25			1			1			0.12				0.015
						2			2			0.12				0.015
						3			2			0.12				0.03
						Median			2			0.12				0.015
NCTC 13479			WHO K; CIP-R, AZI MIC 0.25			1			0.5			4				0.015
						2			2			>8				0.06
						3			1			>8				0.12
						Median			1			>8				0.06
NCTC 13480			WHO L; CIP-R, AZI MIC 0.5			1			2			>8				0.25
						2			2			>8				0.12
						3			2			>8				0.25
						Median			2			>8				0.25
NCTC 13481			WHO M; CIP-R, AZI MIC 0.25			1			1			2				0.008
						2			2			2				0.015
						3			2			2				0.03
						Median			2			2				0.015
NCTC 13482			WHO N; CIP-R, AZI MIC 0.25			1			1			4				0.008
						2			4			4				0.015
						3			1			8				0.008
						Median			1			4				0.008
NCTC 13483			WHO O; CIP-S, AZI MIC 0.25			1			1			0.015				0.015
						2			2			0.015				0.03
						3			2			0.015				0.008
						Mode			2			0.015				0.015
NCTC 13484			WHO P; CIP-S, AZI MIC 4			1			2			0.008				0.008
						2			>32			0.008				0.008
						3			>32			0.008				0.015
						Median			>32			0.008				0.008
Isolate			Type			Run			MIC (µg/mL)
									CBD			CIP				CRO
NCTC 13817			WHO U; CIP-S, AZI MIC 4			1			1			0.004				0.002
						2			4			0.004				0.002
						3			4			0.004				0.002
						Median			4			0.004				0.002
NCTC 13818			WHO V; CIP-R, AZI MIC >256			1			1			>8				0.015
						2			4			>8				0.03
						3			1			>8				0.03
						Median			1			>8				0.03
NCTC 13819			WHO W; CIP-R, AZI MIC 0.5			1			1			>8				0.12
						2			4			>8				0.12
						3			2			>8				0.12
						Median			2			>8				0.12
NCTC 13820			WHO X; CRO-NS, CIP-R,			1			1			>8				2
						2			4			>8				2
						3			2			>8				2
						Median			2			>8				2
NCTC 13821			WHO Y; CIP-R, AZI MIC 1			1			NG			NG				NG
						2			4			>8				1
						3			2			8				1
						Median			4			>8				1
MMX 10409			CIP-R			1			1			>8				0.06
						2			4			>8				0.03
						3			2			>8				0.03
						Median			2			>8				0.03
CDC 0165			CIP-R, AZI MIC 1			1			2			>8				0.06
						2			8			>8				0.06
						3			2			>8				0.03
						Median			2			>8				0.06
CDC 0166			CIP-R, AZI MIC 1			1			2			>8				0.06
						2			16			>8				0.06
						3			2			8				0.03
						Median			2			>8				0.06
CDC 0167			CIP-S, AZI MIC 8			1			1			0.004				0.004
						2			2			0.008				0.008
						3			2			0.004				0.008
						Median			2			0.004				0.008
Isolate			Type			Run			MIC (µg/mL)
									CBD			CIP				CRO
CDC 0172			CIP-R, AZI MIC 0.5			1			2			>8				0.06
						2			4			>8				0.06
						3			1			>8				0.03
						Median			2			>8				0.06
CDC 0177			CIP-S, AZI MIC 2			1			1			0.015				0.015
						2			2			0.03				0.015
						3			2			0.015				0.03
						Median			2			0.015				0.015
CDC 0175			CIP-S, AZI MIC16			1			1			0.004				0.008
						2			4			0.008				0.004
						3			2			0.004				0.008
						Median			2			0.004				0.008
CDC 0181			CIP-S, AZI MIC 256			1			0.5			0.015				0.008
						2			2			0.015				0.015
						3			1			0.015				0.03
						Median			1			0.015				0.015
CDC 0194			CRO-NS, CIP-S, AZI MIC 0.5			1			1			0.004				0.25
						2			4			0.004				0.25
						3			2			0.004				0.12
						Median			2			0.004				0.25
CDC 0174			NA			1			2			>8				0.06
						2			2			>8				0.12
						3			0.5			>8				0.015
						Median			2			>8				0.06
CDC178			NA			1			2			>8				0.06
						2			>32			>8				0.06
						3			2			8				0.015
						Median			2			>8				0.06
CDC 0180			NA			1			2			>8				0.03
						2			4			>8				0.03
						3			1			>8				0.008
						Median			2			>8				0.03
1CLSI QC ranges shown in parentheses; AZI, azithromycin; CIP, ciprofloxacin; CRO, ceftriaxone; S, susceptible; R, resistant; NS, non-susceptible; *, result uninterpretable; NG, no growth. When isolate only had two values, the median was represented by the higher MIC value
Table 2. Summary of activity of CBD and comparators against 26 Isolates of N. gonorrhoeae
Drug	Median MIC value (µg/mL)
	≤0.004	0.008			0.015	0.03		0.06		0.12			0.25	0.5		1	2	4			8	>8	>32
CBD																5	17	3					1
CIP	6	1			3					1							1	1				13
CRO	2	4			6	3		6		1			2			1	1
Drug					MIC Range (µg/mL)					MIC Mode (µg/mL)						MIC50 (µg/mL)					MIC90 (µg/mL)
CBD					1 - >32					2						2					4
CIP					0.004 - >8					>8						4					>8
CRO					<0.0005 - 2					0.015, 0.06						0.03					0.25
CBD, cannabidiol; CRO, ceftriaxone; CIP, ciprofloxacin. MIC range, mode, MIC50, and MIC90 calculations are taken from median value of the three independent agar dilution experiments (Table 1)
Figure 1. Histograms of the median MIC values of CBD and comparators against 26 isolates of N. gonorrhoeae CBD, cannabidiol; CRO, ceftriaxone; CIP, ciprofloxacin. MIC values are taken from median value of the three agar dilution experiments (Table 1
	CBD			CIP			CRO
	0.5	2	0.5	0.004 (0.001-0.008)1	0.004 (0.001-0.008)1	0.004 (0.001-0.008)1	≤0.0005	0.015 (0.004-0.015)1	≤0.0005
	0.5	2	1	0.004	0.004	0.004	0.015 (0.004-0.015)1	0.002	0.002
	1	2	1	0.004	0.004	0.004	0.002	0.004	0.008
	1	2	1	0.004	0.004	0.004	0.004	0.008	0.008
	1	2	1	0.004	0.008	0.004	0.008	0.008	0.008
	1	2	1	0.004	0.008	0.004	0.008	0.015	0.008
	1	2	1	0.008	0.008	0.008	0.008	0.015	0.008
	1	2	1	0.015	0.015	0.015	0.008	0.015	0.015
	1	2	2	0.015	0.015	0.015	0.008	0.015	0.015
	1	2	2	0.015	0.03	0.015	0.015	0.015	0.015
	1	4	2	0.12	0.12	0.12	0.015	0.03	0.03 (0.004-0.015)1
	1	4	2	2	2	2	0.015	0.03	0.03
	1	4	2	4	4	8	0.015	0.03	0.03
	1	4	2	4	>8	8	0.015	0.03	0.03
	1	4	2	>8	>8	8	0.03	0.06	0.03
	1	4	2	>8	>8	8	0.06	0.06	0.03
	2	4	2	>8	>8	>8	0.06	0.06	0.03
	2	4	2	>8	>8	>8	0.06	0.06	0.03
	2	4	2	>8	>8	>8	0.06	0.06	0.03
	2	4	2	>8	>8	>8	0.06	0.12	0.03
	2	4	2	>8	>8	>8	0.06	0.12	0.12
	2	4	2	>8	>8	>8	0.12	0.12	0.12
	2	8	2	>8	>8	>8	0.25	0.25	0.12
	2	16	4	>8	>8	>8	0.25	1	0.25
	2	>32	4	>8	>8	>8	2	2	1
	NG	>32	>32	NG	>8	>8	NG	*	2

## Sheet: Fig 2b biofilm
Staphylococcus aureus
ATCC 25923
Compound ID	Compound name	CAMHB	TSB+ 3% Glucose
		Broth MIC (µg/mL)
MCC_000095	Vancomycin	1, 2	1,1
MCC_000561	Daptomycin	2,2	16/32
MCC_008132	Clindamycin	0.06/0.125	0.06/0.125/0.25
MCC_009395	Mupirocin	0.5	0.125
MCC_009427	Cannabidiol	0.5/1	0.5/0.25
Staphylococcus aureus
ATCC 25923
Compound ID	Compound name	Biofilm MIC (TSB+ 3% Gluc) 20/03/20		Biofilm MIC (TSB+ 3% Gluc) 26/03/20
		MIC (µg/mL)
MCC_000095	Vancomycin	8	4	16	4
MCC_000561	Daptomycin	16	16	16	32
MCC_008132	Clindamycin	0.125	0.06	0.06	0.125
MCC_009395	Mupirocin	0.125	0.125	0.06	0.25
MCC_009427	Cannabidiol	1	1	2	2
Staphylococcus aureus
ATCC 43300
Compound ID	Compound name	CAMHB	TSB+ 5% Glucose
		Broth MIC (µg/mL)
MCC_000095	Vancomycin	0.5	1
MCC_000561	Daptomycin	0.5/1	32
MCC_000191	Trimethoprim	1	4
MCC_009395	Mupirocin	0.25	0.25
MCC_008132	Clindamycin*	>64	>64
MCC_009427	Cannabidiol	1	0.5
Staphylococcus aureus
ATCC 43300
Compound ID	Compound name	Biofilm MIC (TSB+ 5% Gluc) 07/112/18		Biofilm MIC (TSB+ 5% Gluc) 14/112/18
		MIC (µg/mL)
MCC_000095	Vancomycin	4	4	4	4
MCC_000561	Daptomycin	32	16	16	16
MCC_000191	Trimethoprim	8	8	16	>64
MCC_009395	Mupirocin	0.25	0.125	0.25	0.25
MCC_008132	Clindamycin	>64	>64	>64	>64
MCC_009427	Cannabidiol	4	4	2	2

## Sheet: Fig 2c biofilm
20190415	cannabidiol-GP_20		results
cannabidiol-untreated(0 ug/ml)
	Image020(manually)	Image025	Image027	Image024	Image018
green	2782	2987	2682	1594	1710
red	707	512	578	247	275
viable cells	2075	2475	2104	1347	1435
%viable cells	0.745866	0.828591	0.784489	0.845044	0.839181
average
cannabidiol-(1 ug/ml)
	Image031(manually)	Image029(manually)	Image013(manually)	Image010(manually)	Image027	Image026	Image025	Image024	Image023	Image016	Image020	Image019	Image018	Image015	Image014	Image017	Image004	Image006
green	2709	2914	2802	3246	2123	1562	1594	1936	1509	1945	1635	1764	2128	1954	2000	2003	1761	2760
red	634	660	737	757	479	341	344	458	219	206	284	297	247	197	185	193	303	828
viable cells	2075	2254	2065	2489	1644	1221	1250	1478	1290	1739	1351	1467	1881	1757	1815	1810	1458	1932
%viable cells	0.765965	0.773507	0.736974	0.76679	0.774376	0.78169	0.784191	0.76343	0.854871	0.894087	0.8263	0.831633	0.883929	0.899181	0.9075	0.903645	0.827939	0.7
average
cannabidiol-(8 ug/ml)
	Image025(manually)	Image031	Image030	Image028	Image027	Image024	Image023	Image012	Image021	Image020	Image019	Image018	Image017	Image007	Image005
green	1918	1598	1620	2140	1583	970	1771	3384	1693	1091	1721	1690	1645	3102	2981
red	362	220	319	492	290	335	278	817	267	222	258	145	187	758	760
viable cells	1556	1378	1301	1648	1293	635	1493	2567	1426	869	1463	1545	1458	2344	2221
%viable cells	0.811262	0.862328	0.803086	0.770093	0.816804	0.654639	0.843027	0.75857	0.842292	0.796517	0.850087	0.914201	0.886322	0.755642	0.745052
average
cannabidiol-(32 ug/ml)														from here---threshold
	Image002(manually)	Image003(manually)	Image005(manually)	Image008(manually)	Image010(manually)	Image011(manually)	Image012(manually)	Image013(manually)	Image014(manually)	Image016(manually)	Image001	Image030(manually)	Image029(manually)	Image028	Image027	Image016	Image013	Image005	Image009	Image008	Image006	Image004	Image001
green	1772	2420	675	358	1444	371	120	200	340	392	2620	421	1006	1481	1589	2434	2764	1731	2765	1425	2047	1572	2488
red	1206	1710	483	224	898	241	90	154	267	334	2477	349	861	1187	1327	1547	2094	1187	2239	631	1180	1518	2267
viable cells	566	710	192	134	546	130	30	46	73	58	143	72	145	294	262	887	670	544	526	794	867	54	221
%viable cells	0.319413	0.293388	0.284444	0.374302	0.378116	0.350404	0.25	0.23	0.214706	0.147959	0.0545802	0.171021	0.144135	0.198515	0.164884	0.364421	0.242402	0.314269	0.190235	0.557193	0.423547	0.0343511	0.0888264
average
cannabidiol-(128 ug/ml)
	Image018(manually)	Image020	Image019	Image017	Image014	Image012
green	2842	292	418	582	738	576
red	2595	279	358	503	607	516
viable cells	247	13	60	79	131	60
%viable cells	0.0869106	0.0445205	0.143541	0.135739	0.177507	0.104167
average
20190417	cannabidiol-GP_20		results
cannabidiol-untreated(0 ug/ml)
	Image029(manually)	Image028(manually)	Image027(manually)	Image026(manually)	Image020
green	936	782	1317	1486	531
red	210	183	381	456	184
viable cells	726	599	936	1030	347
%viable cells	0.775641	0.765985	0.710706	0.693136	0.653484
average
cannabidiol-(1 ug/ml)
	Image025(manually)	Image024(manually)	Image010(manually)	Image002(manually)	Image011(manually)	Image031	Image030	Image026	Image013	Image029	Image028	Image013	Image001
green	989	198	1678	1107	1675	2526	2074	630	453	3188	2479	447	537
red	324	60	520	514	513	538	528	268	119	666	535	145	308
viable cells	665	138	1158	593	1162	1988	1546	362	334	2522	1944	302	229
%viable cells	0.672396	0.69697	0.690107	0.535682	0.693731	0.787015	0.745419	0.574603	0.737307	0.791092	0.784187	0.675615	0.426443
average
cannabidiol-(8 ug/ml)
	Image030	Image029	Image028	Image027	Image026	Image025	Image024	Image023	Image021	Image020	Image019	Image018	Image017	Image015	Image014	Image006	Image005	Image004	Image003
green	1559	1169	1175	696	1132	415	223	488	350	1433	1403	1288	849	404	794	854	926	1032	1156
red	637	488	434	249	409	169	108	177	120	555	649	504	291	288	249	367	352	363	344
viable cells	922	681	741	447	723	246	115	311	230	878	754	784	558	116	545	487	574	669	812
%viable cells	0.591405	0.582549	0.630638	0.642241	0.638693	0.592771	0.515695	0.637295	0.657143	0.612701	0.53742	0.608696	0.657244	0.287129	0.686398	0.570258	0.61987	0.648256	0.702422
average
cannabidiol-(32 ug/ml)
	Image030(manually)	Image027(manually)	Image010(manually)	Image032	Image024	Image016	Image017	Image031	Image020	Image014	Image010
green	947	792	1263	1452	2163	1896	1207	655	906	1596	1238
red	701	601	1245	954	1077	1312	595	473	695	1409	1205
viable cells	246	191	18	498	1086	584	612	182	211	187	33
%viable cells	0.259768	0.241162	0.0142518	0.342975	0.50208	0.308017	0.507042	0.277863	0.232892	0.117168	0.0266559
average
cannabidiol-(128 ug/ml)
	Image027	Image021	Image022	Image024	Image019	Image018	Image016	Image015	Image011
green	1142	1004	1238	1483	359	250	896	981	1115
red	907	729	1076	1448	327	231	670	805	959
viable cells	235	275	162	35	32	19	226	176	156
%viable cells	0.205779	0.273904	0.130856	0.0236008	0.0891365	0.076	0.252232	0.179409	0.13991
average
20190424	cannabidiol-GP_20		results
cannabidiol-untreated(0 ug/ml)
	Image039	Image038	Image037	Image035	Image018	Image029	Image028	Image026	Image025	Image024	Image019	Image017	Image011	Image006	Image003
green	1538	1245	1493	1417	1772	1693	1080	3149	1694	781	1654	1692	2935	2114	1795
red	279	177	280	323	161	397	125	515	262	202	249	169	479	574	291
viable cells	1259	1068	1213	1094	1611	1296	955	2634	1432	579	1405	1523	2456	1540	1504
%viable cells	0.818596	0.857831	0.812458	0.772054	0.909142	0.765505	0.884259	0.836456	0.845336	0.741357	0.849456	0.900118	0.836797	0.728477	0.837883
average
cannabidiol-(1 ug/ml)
	Image039	Image038	Image037	Image036	Image035	Image034	Image033	Image032	Image031	Image030	Image029	Image028	Image027	Image026	Image025	Image024	Image023	Image021	Image012	Image009	Image005	Image003	Image001
green	1545	1841	1815	1773	1516	1567	1482	1478	1428	1605	1378	1336	1431	1545	1658	1590	1283	1878	2184	2289	3200	1776	2083
red	175	176	214	186	152	197	171	256	215	270	212	178	165	159	234	118	114	234	431	341	546	250	354
viable cells	1370	1665	1601	1587	1364	1370	1311	1222	1213	1335	1166	1158	1266	1386	1424	1472	1169	1644	1753	1948	2654	1526	1729
%viable cells	0.886731	0.9044	0.882094	0.895093	0.899736	0.874282	0.884615	0.826793	0.84944	0.831776	0.846154	0.866766	0.884696	0.897087	0.858866	0.925786	0.911146	0.875399	0.802656	0.851027	0.829375	0.859234	0.830053
average
cannabidiol-(8 ug/ml)
	Image026	Image025	Image023	Image022	Image021	Image019	Image020	Image018	Image013	Image016	Image014	Image009	Image003	Image030
green	913	1207	1240	1328	1646	769	771	977	1042	2798	2546	3335	2110	2404
red	160	252	214	94	101	252	139	245	202	899	756	844	1023	738
viable cells	753	955	1026	1234	1545	517	632	732	840	1899	1790	2491	1087	1666
%viable cells	0.824754	0.791218	0.827419	0.929217	0.938639	0.672302	0.819715	0.749232	0.806142	0.678699	0.703064	0.746927	0.515166	0.693012
average
cannabidiol-(32 ug/ml)
	Image054	Image053	Image052	Image051	Image050	Image049	Image048	Image045	Image017	Image015	Image013	Image011	Image009	Image039	Image032	Image031	Image030	Image025	Image008
green	736	1252	1410	1252	1014	1282	1174	2264	2052	2339	2562	2126	1859	815	1366	1106	1819	1130	413
red	558	1027	1096	882	634	772	615	1687	1735	1829	2295	1795	1771	681	650	726	1356	966	371
viable cells	178	225	314	370	380	510	559	577	317	510	267	331	88	134	716	380	463	164	42
%viable cells	0.241848	0.179712	0.222695	0.295527	0.374753	0.397816	0.47615	0.254859	0.154483	0.218042	0.104215	0.155691	0.0473373	0.164417	0.524158	0.34358	0.254535	0.145133	0.101695
average
cannabidiol-(128 ug/ml)
	Image044	Image033	Image032	Image031	Image029	Image028	Image036
green	358	229	406	426	434	479	2823
red	305	200	331	423	375	467	2782
viable cells	53	29	75	3	59	12	41
%viable cells	0.148045	0.126638	0.184729	0.00704225	0.135945	0.0250522	0.0145236
average

## Sheet: Fig 3
Cannabidiol MIC
	Day	Replicate1	Replicate2	Replicate3	Replicate4	Replicate5	Replicate6	Replicate7	Replicate8
	1	1	1.25	1.25	2	1.25	2	1.25	2
	2	1.5	1.5	1.5	1.5	1.5	1.5	1.5	1.5
	3	1.5	2	2	2	2	2	2	2.5
	4	2	2.5	2.5	2	2	2	1.5	2.5
	5	3	3	3	3	3	2.5	2.5	3
	6	2.5	2.5	3	3	2.5	2.5	2.5	3
	7	2	2.5	2.5	2.5	2.5	2.5	2.5	3
	8	2.5	2.5	2.5	2.5	2.5	2.5	2.5	2.5
	9	2.5	2.5	3	3	3	2.5	2.5	3
	10	3	4	3	4	3	4	4	4
	11	2	2	2	2	2	2	2	2
	12	3	2.5	2.5	2.5	2.5	2.5	2.5	3
	13	3	2.5	2.5	2.5	2.5	2.5	2.5	3
	14	2.5	2.5	2.5	2.5	2.5	2.5	2.5	2.5
	15	2	2	2	2	2	2	2	2
	16	2	2	2	2	2	2	2	2
	17	2	2	1.5	1.5	1.5	2	2	2.5
	18	2	2	2	2	2	2.5	2	2.5
	19	2	2	2	2	2	2	2	3
	20	3	2	2	2	2	2	2	3
	21	2	2	2	2	2.5	2	2	2
	22	2.5	2	2	2	2	2	2	2
	23	2.5	2.5	2.5	2.5	2.5	2.5	2.5	2.5
	24	2.5	2.5	2.5	2.5	2.5	2.5	2.5	2.5
Daptomycin MIC
	Day	Replicate1	Replicate2	Replicate3	Replicate4	Replicate5	Replicate6	Replicate7	Replicate8
	1	0.375	0.25	0.25	0.25	0.375	0.375	0.25	0.25
	2	0.75	0.75	0.5	0.375	0.75	0.75	0.75	0.75
	3	1	0.75	0.75	0.75	0.75	0.75	1	1
	4	1.5	0.75	0.75	0.75	0.75	0.75	0.75	1
	5	1.5	1.5	1	1	1	1	1	3
	6	1.5	1.5	0.75	0.75	0.75	1	1	4
	7	1.5	1.5	0.75	0.75	0.75	0.75	0.75	4
	8	2	4	1.5	1.5	1	1.5	1	6
	9	2.5	4	2	3	1.5	2.5	1.5	7
	10	2	4	1.5	2.5	1.5	2.5	1.5	4
	11	2	4	1.5	2.5	1.25	3	2	3
	12	2	5	2	3	1.5	3	2	5
	13	2.5	5	2	3	1.5	5	2.5	5
	14	2.5	7	1.6	4	1.25	4.5	2.5	5
	15	4	6	2.5	4	2	4	2.5	6
	16	6	8	2.5	5	2.5	6	3	8
	17	7	8	3	5	4	6	6	9
	18	9	7	4	4.5	2.5	5	7	7
	19	9	8	4	5	3	6	9	8
	20	10	10	5	5	4	7	10	10
	21	16	8	2.5	4	4	5	8	8
	22	16	16	2.5	4	4	5	8	8
	23	16	16	2.5	2.5	2.5	5	5	5
	24	16	16	2.5	2.5	2.5	5	5	5

## Sheet: Fig 4a
[Agonist], M	DNA (EC50=~2.794)			RNA (EC50=~2.847)			Protein (EC50=~2.844)			Phospholipid (EC50=1.036)			Peptidoglycan (EC50=3.374)
80	11.6596	12.9496		10.6581	12.2724		24.0159	24.618		33.0427	28.4733		7.94579	4.86448
26.6667	13.3466	13.6443		15.9975	12.024		28.4676	28.2852		39.5588	35.6305		3.66619	4.09415
8.88889	15.8273	16.3235		22.7028	22.7028		37.6811	33.9957		45.7019	47.6718		6.14836	4.09415
2.96296	43.8105	37.0628		66.5356	49.3998		59.9395	51.0726		54.8873	56.6474		64.9501	48.4308
0.987654	110.593	113.123		132.347	137.935		136.184	132.097		87.2928	86.1854		89.087	77.8745
0.329218	99.1317	106.822		138.431	121.171		113.761	122.683		103.787	102.878		88.4023	91.4836
0.109739	97.4448	102.853		124.772	117.819		122.664	119.909		107.715	105.186		92.3395	88.5735
0.0365798	94.2198	99.876		131.229	119.805		125.583	116.133		126.564	132.206		90.1997	88.4879

## Sheet: Fig 4b
Data Analysis
Treatment Time (s)	DMSO	16 ug/ml 9427 (8 X MIC)	8 ug/ml 9427 (4 X MIC)	4 ug/ml 9427 (2 X MIC)	2 ug/ml 9427 (1 X MIC)	1 ug/ml 9427 (0.5 X MIC)
0	4337	2977	3088	2715	2400	2538
10	4611	3341	3239	2940	2937	2821
20	4395	3290	3314	2819	2378	2713
30	4429	3593	3456	2839	2760	2673
40	4551	3773	3102	2722	2711	2790
50	4580	3696	3449	2797	2219	2414
60	4643	3834	2953	2649	2592	2467
70	4293	3384	3237	2819	2535	2504
80	4348	3357	3017	2727	2403	2352
90	3774	3448	3323	2667	2477	2579
100	4401	3417	3431	2750	2338	2565
110	4475	3908	3473	2815	2569	2295
120	4580	4075	3905	3456	3007	2657
130	4289	3718	3713	2967	2723	2735
140	4291	3986	3619	3227	2639	2728
150	4321	4134	3506	2818	2858	2616
160	4504	3906	3772	3094	2760	2893
170	4648	3698	3722	2990	2991	2783
180	4424	3861	3450	2819	2702	2687
190	4536	3909	3585	3145	2887	2565
200	4793	4502	3633	3239	2935	2654
210	4568	4455	3800	3096	2921	2844
220	4863	4551	4075	3226	3118	2587
230	4648	4519	3766	3614	3254	3026
240	4640	4513	4096	3691	3592	2913
250	4418	4307	3992	3787	3116	2909
260	4778	4589	4687	3959	3345	3284
270	4783	4624	4095	3753	3326	2857
280	4610	4553	4316	4000	3503	3024
290	4780	4660	4126	3353	3588	2619
300	4430	4561	4213	3489	3603	2771
310	4535	4764	4044	3346	3222	3234
320	4643	4327	4214	3597	3259	3059
330	4782	4407	3791	3489	3181	2538
340	4487	4753	4098	3560	3070	3085
350	4631	4850	4333	3611	3712	3202
360	4608	4775	4533	3997	3576	3346
370	4794	4242	3835	3384	3302	3118
380	4787	5295	4636	3890	3742	3173
390	4301	4418	4289	3710	3444	3160
400	4513	5012	4551	3817	3463	2590
410	4414	4592	4254	3678	3471	3039
420	4434	4690	4211	3439	3396	2987
430	4596	5324	4621	3506	3612	3459
440	4075	4668	4012	3318	3184	2759
450	4239	4577	4285	3642	3325	2935
460	4309	4841	4353	3799	3428	3028
470	4790	4831	4435	4287	3355	3133
480	4273	5043	4462	3702	3055	2990
490	4239	5056	4135	3606	3790	3205
500	4330	5027	4591	4095	3871	3288
510	4338	4932	4579	3615	3549	3212
520	4279	5106	4374	3735	3670	3173
530	4711	5345	4385	3891	3546	2939
540	4619	5192	5014	4333	4005	3596
550	5130	5687	5021	4258	4117	3915
560	4682	5369	4603	4204	3849	3731
570	4793	5851	4760	4382	3818	3398
580	4916	5390	4992	4057	3632	3208
590	4355	5536	4786	4085	3676	3323
600	4505	5370	5023	4203	3636	3399
610	4483	5596	4747	3916	3694	3468
620	5005	5821	5020	4344	3773	3371
630	4553	5388	4825	4138	3584	3036
640	4477	5652	4871	4071	3981	3594
650	4708	6004	5224	4331	3999	3635
660	5009	5922	5051	4571	3847	3438
670	4608	5831	5221	4500	3868	3597
680	4819	5863	5251	4485	4179	3659
690	5148	6038	5230	4924	4476	3863
700	4613	5822	5132	4558	4344	3611
710	4671	5838	5098	4596	3968	3603
720	4627	5803	4916	4428	4154	3416
730	4570	6148	5080	4492	4078	3748
740	4553	5803	5055	4400	4276	3721
750	5038	6199	5247	4899	4262	4115
760	4913	5958	5195	4968	4470	3995
770	5029	6485	5486	4919	4321	3925
780	5495	6323	5766	4760	4311	3955
790	5091	6408	5396	5089	4454	3809
800	4690	6156	5529	4945	4330	4010
810	4736	6093	5349	4648	4379	3510
820	5051	6042	5401	4634	4200	3566
830	4762	6045	5335	4850	4416	3914
840	4626	5994	5489	4613	4460	3983
850	4874	6527	5273	4954	4268	3995
860	4335	6256	5273	4705	4071	3664
870	4610	6458	5762	4800	4385	3707
880	4644	6203	5462	4736	4258	3973
890	4875	6590	5593	4984	4705	3647
900	4791	6748	5436	4504	4223	3599
910	4820	6503	5793	4689	4652	3944
920	4792	6916	5882	4985	4307	4150
930	5054	6616	5777	4801	3881	4155
940	4636	6534	5328	4779	4317	3697
950	4613	6466	5487	4600	4115	3609
960	4719	6401	5768	4755	4582	4215
970	4775	6755	5566	4728	4466	3987
980	4354	6376	5195	4766	4325	3680
990	4433	6708	5491	4914	4309	3742
1000	4847	6568	5738	5156	4637	3901
1010	4632	6313	5726	4799	4096	4010
1020	4566	6674	5433	4980	4259	3736
1030	4555	6621	5521	4735	4579	3812
1040	4958	6549	5915	5089	4408	3762
1050	4765	6777	5253	4521	4370	3587
1060	4532	6414	5209	4509	4188	3610
1070	4277	6038	5316	4603	4073	3898
1080	4358	6822	6019	5041	4174	3840
1090	4497	6473	5443	4924	4273	3665
1100	4619	6637	5677	4838	4085	3958
1110	4606	6613	5693	5008	4480	3931
1120	4836	6602	6006	5031	4582	4088
1130	4487	6795	5620	4826	4969	4138
1140	4394	6518	5822	4958	4745	3830
1150	5061	7005	5571	5403	4638	3978
1160	4705	6616	6085	5220	4812	3959
1170	4995	6926	5974	5406	5068	4160
1180	4740	6795	5906	5159	4493	4080
1190	4685	6848	5603	5328	4524	4170
1200	4648	6905	6339	5380	4748	4004
1210	4618	6959	6251	5191	4678	3988
1220	4632	6352	5763	4780	4370	3732
1230	4910	7306	6010	5307	4527	3951
1240	4355	6954	5629	4938	4737	4054
1250	4956	6937	6172	5398	4786	4006
1260	4830	6830	6420	5307	5026	4539
1270	4583	7157	5751	5210	4801	4398
1280	4244	6785	5807	5150	4886	4109
1290	4653	6552	5993	4718	4685	3824
1300	4202	6594	5583	4683	4257	3676
1310	4297	6555	5807	4609	4293	3693
1320	4272	6804	5471	4833	4652	3672
1330	4430	6622	5376	5005	4446	3824
1340	4200	6927	5985	4745	4651	3988
1350	4425	7030	5877	5211	4552	3831
1360	4271	6875	6283	5271	4796	3926
1370	4500	6824	6032	5093	4672	4096
1380	4506	7021	5686	5231	4250	3616
1390	4421	6687	5641	4957	4161	3712
1400	4011	6451	5364	4406	4230	3683
1410	3977	6572	5898	5180	4957	4022
1420	4500	7108	5783	5159	4690	3951
1430	4552	6871	6247	5078	4540	4139
1440	4741	6851	6258	5462	4701	3851
1450	4347	7079	5849	5108	4309	3885
1460	4187	6511	5562	5123	4232	3801
1470	4450	6911	5902	5114	4431	3919
1480	4331	6751	5803	4977	4879	3928
1490	4629	7108	6461	5368	4837	4073

## Sheet: Fig 4c
Data Analysis
Treatment Time (s)	DMSO	16 ug/ml 9427	8 ug/ml 9427	4 ug/ml 9427	2 ug/ml 9427	1 ug/ml 9427
0	17158	11503	9861	9831	9176	10010
20	16418	11237	9695	9276	8621	9124
40	15920	11563	10125	9760	9167	10358
60	15572	11937	10230	9479	9295	10112
80	15317	11822	10088	9664	9540	10255
100	15273	11881	10141	9720	9623	10660
120	14798	12017	10264	10047	10009	10642
140	15036	12145	10340	9892	10275	11135
160	15438	12424	10381	10199	10714	11651
180	14926	12628	10368	10263	10714	11195
200	15002	12693	10939	10800	10931	11932
220	15155	12699	10963	10992	10919	11988
240	15317	12471	11565	11095	11396	12687
260	14583	12431	11044	10683	11504	12444
280	15095	13427	11329	10936	11187	12856
300	14766	12935	11457	11644	11693	13126
320	14586	12902	11903	11593	11663	12861
340	14687	13154	11592	11366	11619	13089
360	14692	12950	11629	11495	11619	13160
380	14285	13108	11406	11350	11645	12821
400	14145	13347	11796	11797	11614	12493
420	14292	12877	11691	11382	11416	12921
440	14136	13404	12223	11805	11946	12589
460	13996	13913	12206	12306	12151	13123
480	13794	12822	11574	11490	11152	12350
500	13749	13146	11441	11389	11087	12219
520	13587	12694	11515	11267	11378	12306
540	13553	12933	11462	11619	11663	12423
560	13430	13082	11583	11753	11751	12215
580	13909	13387	11754	12299	11664	12219
600	13247	13525	11861	12009	11668	12422
620	13946	13100	11927	12244	11639	12558
640	13828	13012	12044	11600	11533	12357
660	13656	13529	12214	12395	11961	12693
680	13415	13377	11809	12356	12056	12503
700	13556	13331	12013	11989	11661	12391
720	13550	13579	11873	11809	11658	12421
740	13247	13152	12281	12349	11672	12367
760	12820	13254	12135	11987	11565	12382
780	13421	13345	11952	11776	11960	12623
800	13086	13234	12128	11998	12344	12830
820	13381	13813	12548	12021	11995	12302
840	13360	14027	12555	12150	11970	12542
860	13270	13841	12403	11989	12179	12578
880	13150	13599	12406	11752	11842	12027
900	12715	13230	11944	11616	11492	12079
920	12567	13352	12035	11562	11603	12313
940	12731	13369	11836	12059	11497	11956
960	12106	13226	11893	11865	11573	12167
980	12180	13503	11821	11607	11483	12009
1000	12260	13395	11851	11781	11427	11507
1020	12236	13676	12076	11538	11256	11930
1040	12327	13631	11961	11504	11241	12084
1060	12159	13407	12012	11467	11618	11717
1080	12536	13641	12005	11630	11655	12018
1100	12373	13502	11422	11827	11602	12152
1120	12101	13222	12023	11376	11488	12553
1140	11945	13457	11505	11456	11261	11816
1160	12089	13756	11685	11160	11287	12019
1180	11980	13901	11610	11510	11354	12038
1200	12217	13432	11846	11493	11212	11939
1220	12334	13570	12132	11909	11462	11668
1240	12237	13633	12002	12038	11352	12132
1260	12259	13234	11731	11849	11455	12050
1280	11795	13540	11947	11174	10874	11639
1300	12217	13514	12096	11705	11590	11870
1320	12039	13079	11949	11637	11149	11580
1340	11766	14046	12449	11795	11532	11942
1360	11583	13348	11868	11246	11364	12010
1380	11337	12722	11116	11269	10697	11561
1400	11419	12765	11462	11128	10833	11580
1420	11218	12991	11055	11112	10732	11161
1440	11500	13159	11214	10967	10676	11258
1460	11421	13416	12008	11354	11366	11497
1480	11375	13324	11644	11111	10975	11852
1500	11525	12822	11620	11322	10929	11699
1520	11452	13529	11684	11207	11121	11463
1540	11331	13500	11527	11022	10977	11425
1560	11547	13363	11732	11031	10634	11051
1580	11311	13465	11583	11025	10824	11557
1600	11030	13360	11350	11170	10802	11454
1620	11481	13523	11732	11467	11412	11597
1640	11413	13849	11794	11565	11390	11274
1660	11574	13454	11828	11271	10811	11481
1680	11437	13595	11614	11109	10689	11584
1700	11315	13555	11343	10860	10717	11296
1720	11210	13050	11524	10757	10630	11161
1740	11347	13418	11708	11143	10951	11200
1760	11191	12631	11026	10807	10556	10817
1780	11140	13278	11491	11272	10655	11310

## Sheet: Fig 4d,e
		10 min	30 min	120 min
Methanol 2.5%		1.1	0.3	0.9
CBD 5 μg mL-1		0.8	0.4	0.9
CBD 10 μg/mL		84.7	80.5	86.4
CBD 25 μg mL-1		81.3	80.2	88.3
		10 min	30 min	120 min
Methanol 2.5%		1.1	0.3	0.9
CBD 5 μg mL-1		0.8	0.4	0.9
CBD 10 μg/mL		84.7	80.5	86.4
CBD 25 μg mL-1		81.3	80.2	88.3

[truncated: 7 more sheets: Fig 5a,b, Fig 5c,d, Fig5e-h, Fig 5j,k, Fig S1, Fig S2, Fig S3]
